# Supplementary material for: Dihydrobis(methimazolyl)borato complexes of ruthenium and osmium
Source: Royal Society of Chemistry journal article supplement (doi:10.1039/c7dt02420g), 2017-01-01

## Characterisation of $[\text{RuH}(\text{CO})(\text{PPh}_3)_3\{\text{H}_2\text{B}(\text{mt})_2\}]$ (3a)

### Commentary

The infrared spectrum reveals absorptions at  $\nu = 1936 \text{ cm}^{-1}$ ,  $2110 \text{ cm}^{-1}$ ,  $2201 \text{ cm}^{-1}$  and  $2399 \text{ cm}^{-1}$  in  $\text{CH}_2\text{Cl}_2$  attributable to the carbonyl, Ru–H, B–H–Ru and terminal B–H groups, respectively. Consistent with  $C_1$  symmetry, the  $^1\text{H}$  NMR spectrum shows two distinct  $\text{NCH}_3$  singlets ( $\delta_{\text{H}} = 3.10, 3.57$ ) and four doublets for the methimazolyl groups ( $\delta_{\text{H}} = 6.35, 6.45, 6.62, 6.64$ ;  $^3J_{\text{HH}} = 2.0 \text{ Hz}$ ). The retention of a ruthenium hydride ligand in the resulting complex is indicated by the appearance in the  $^1\text{H}$  NMR spectrum of a high frequency resonance ( $\delta_{\text{H}} = -12.22$ ) the doublet multiplicity of which confirms a monophosphine complex with hydride and phosphine ligands mutually *cis*-coordinated ( $^2J_{\text{PH}} = 23.1 \text{ Hz}$ ).

The 3c-2e Ru–H–B interaction gives rise to a resonance at  $\delta_{\text{H}} = -5.45$ , the broadness of which is due to the coupling to the quadrupolar boron nuclei ( $^{10}\text{B}$  and  $^{11}\text{B}$ ). The terminal B–H resonance was not located, however there is no apparent site exchange between the terminal B–H and B–H–Ru groups over the temperature range 193 – 305 K, although at 305 K the  $^{11}\text{B}$  quadrupole was sufficiently thermally decoupled that a  $^1J_{\text{BH}}$  coupling of *ca* 85 Hz could be discerned. The  $^{31}\text{P}\{^1\text{H}\}$  NMR spectrum shows a singlet at  $\delta 56.7 \text{ ppm}$  and the gross molecular composition was further confirmed by an APCI mass spectrum which included a molecular ion in addition to fragmentations attributable to loss of CO and  $\text{PPh}_3$ .

# <sup>1</sup>H NMR Spectrum of 3a

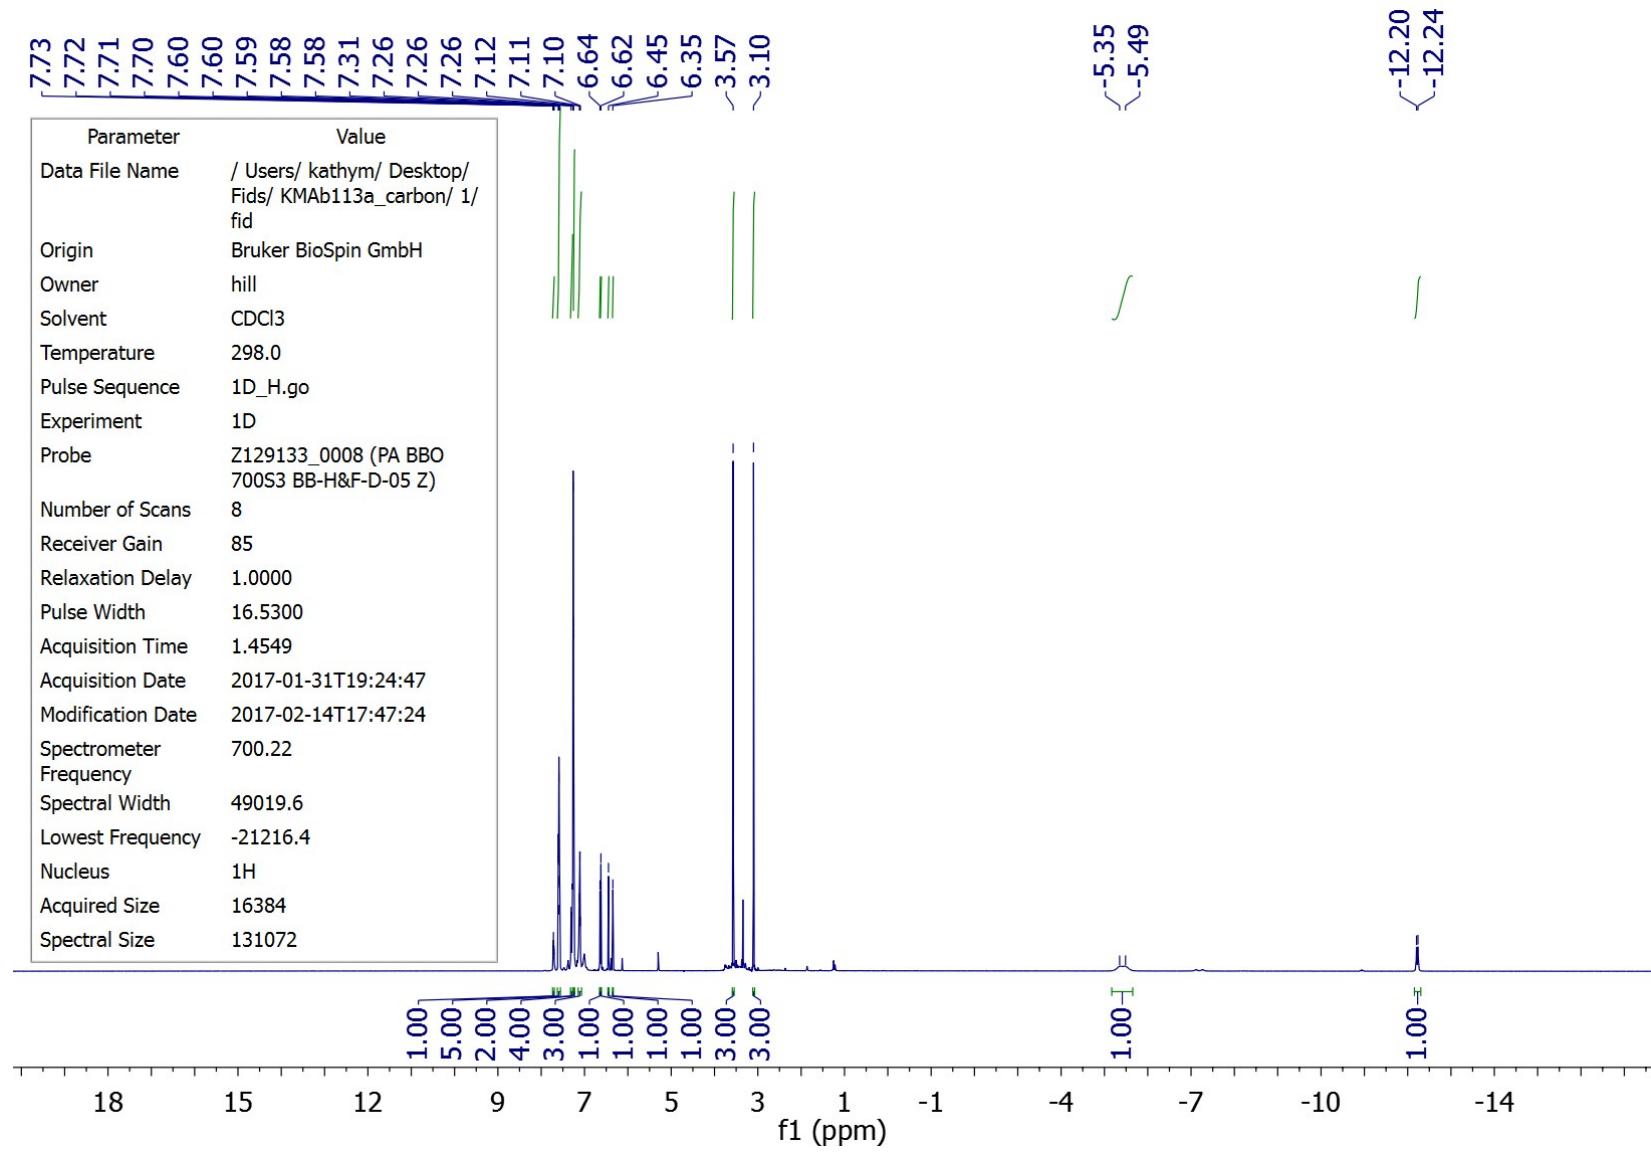

| Parameter         | Value                                                   |
|-------------------|---------------------------------------------------------|
| Data File Name    | / Users/ kathym/ Desktop/ Fids/ KMAB113a_carbon/ 1/ fid |
| Origin            | Bruker BioSpin GmbH                                     |
| Owner             | hill                                                    |
| Solvent           | CDCl3                                                   |
| Temperature       | 298.0                                                   |
| Pulse Sequence    | 1D_H.go                                                 |
| Experiment        | 1D                                                      |
| Probe             | Z129133_0008 (PA BBO 700S3 BB-H&F-D-05 Z)               |
| Number of Scans   | 8                                                       |
| Receiver Gain     | 85                                                      |
| Relaxation Delay  | 1.0000                                                  |
| Pulse Width       | 16.5300                                                 |
| Acquisition Time  | 1.4549                                                  |
| Acquisition Date  | 2017-01-31T19:24:47                                     |
| Modification Date | 2017-02-14T17:47:24                                     |
| Spectrometer      | 700.22                                                  |
| Frequency         |                                                         |
| Spectral Width    | 49019.6                                                 |
| Lowest Frequency  | -21216.4                                                |
| Nucleus           | 1H                                                      |
| Acquired Size     | 16384                                                   |
| Spectral Size     | 131072                                                  |

# <sup>1</sup>H NMR Spectrum of 3a (High Field Expansion)

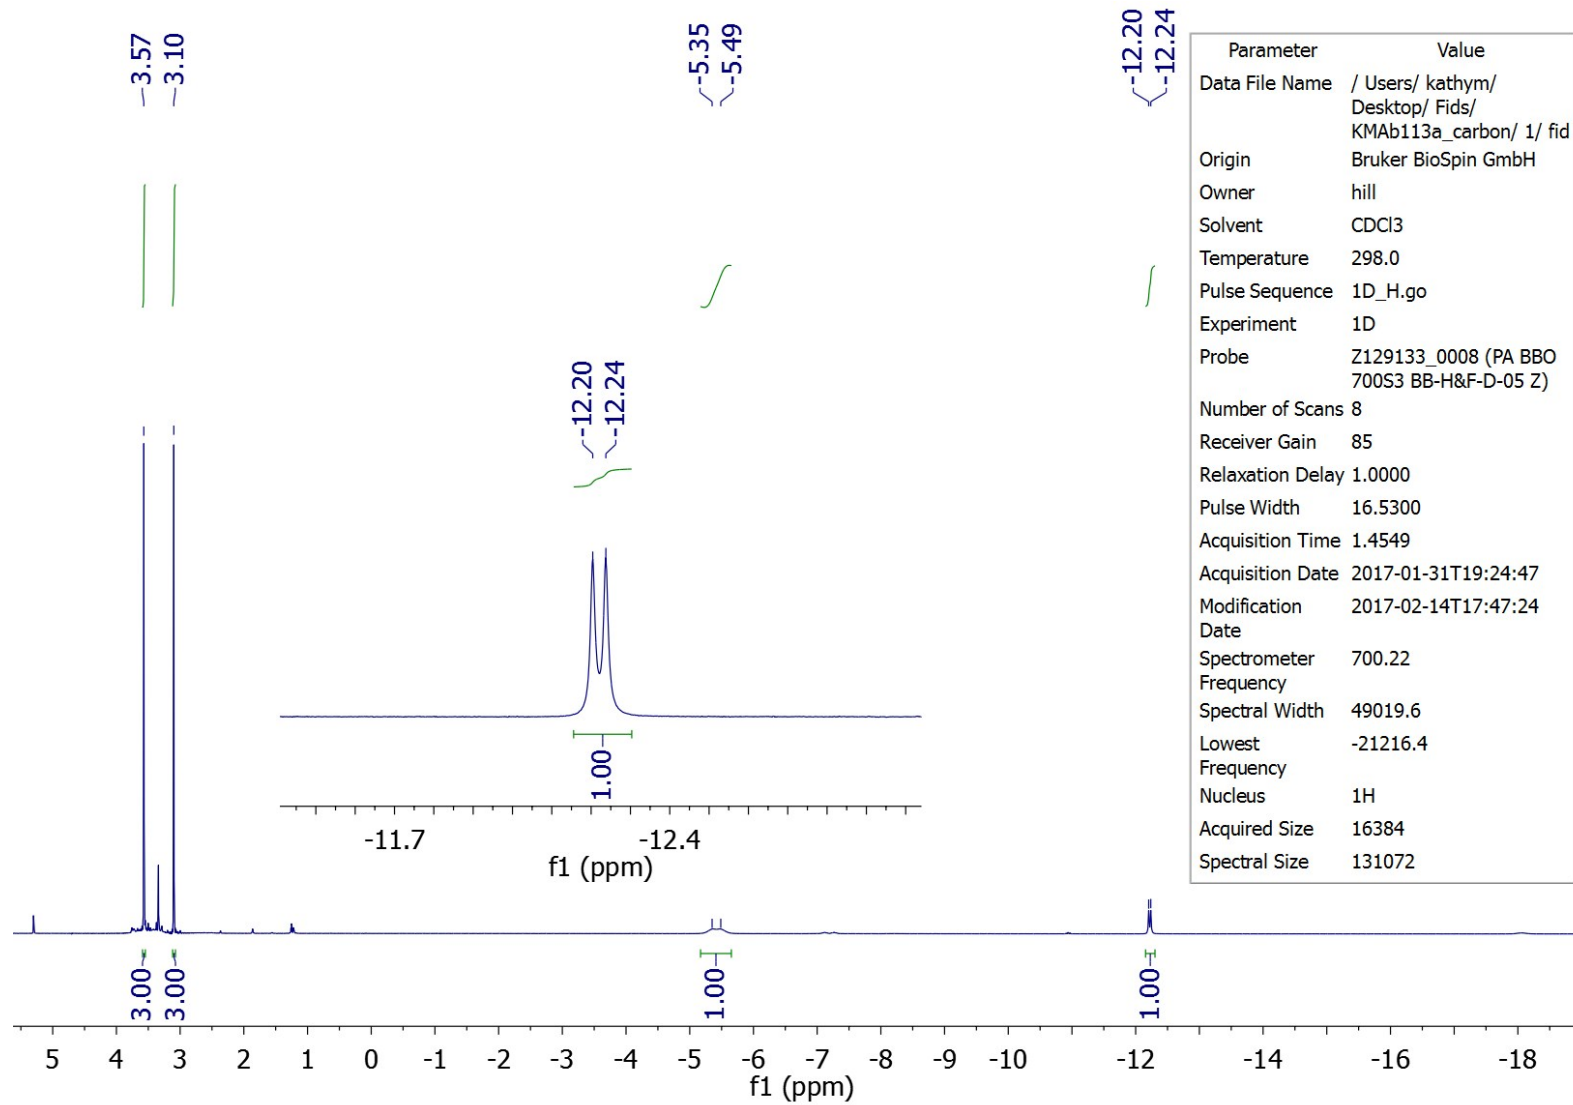

| Parameter              | Value                                                         |
|------------------------|---------------------------------------------------------------|
| Data File Name         | / Users/ kathym/<br>Desktop/ Fids/<br>KMAb113a_carbon/ 1/ fid |
| Origin                 | Bruker BioSpin GmbH                                           |
| Owner                  | hill                                                          |
| Solvent                | CDCl3                                                         |
| Temperature            | 298.0                                                         |
| Pulse Sequence         | 1D_H.go                                                       |
| Experiment             | 1D                                                            |
| Probe                  | Z129133_0008 (PA BBO<br>700S3 BB-H&F-D-05 Z)                  |
| Number of Scans        | 8                                                             |
| Receiver Gain          | 85                                                            |
| Relaxation Delay       | 1.0000                                                        |
| Pulse Width            | 16.5300                                                       |
| Acquisition Time       | 1.4549                                                        |
| Acquisition Date       | 2017-01-31T19:24:47                                           |
| Modification Date      | 2017-02-14T17:47:24                                           |
| Spectrometer Frequency | 700.22                                                        |
| Spectral Width         | 49019.6                                                       |
| Lowest Frequency       | -21216.4                                                      |
| Nucleus                | 1H                                                            |
| Acquired Size          | 16384                                                         |
| Spectral Size          | 131072                                                        |

# $^{11}\text{B}\{^1\text{H}\}$ NMR Spectrum of 3a

| Parameter         | Value                                                                          |
|-------------------|--------------------------------------------------------------------------------|
| Data File Name    | / Users/ kathym/<br>Documents/ APhD2015/<br>Abragam/ KMAB113_CDCl3/<br>12/ fid |
| Origin            | Bruker BioSpin GmbH                                                            |
| Owner             | av400bb                                                                        |
| Solvent           | CDCl3                                                                          |
| Temperature       | 300.0                                                                          |
| Pulse Sequence    | zg                                                                             |
| Experiment        | 1D                                                                             |
| Probe             | Z116098_0258 (PA BBO<br>400S1 BBF-H-D-05 Z SP)                                 |
| Number of Scans   | 200                                                                            |
| Receiver Gain     | 193                                                                            |
| Relaxation Delay  | 0.2000                                                                         |
| Pulse Width       | 10.0000                                                                        |
| Acquisition Time  | 1.2845                                                                         |
| Acquisition Date  | 2016-09-21T17:05:09                                                            |
| Modification Date | 2016-09-21T17:18:09                                                            |
| Spectrometer      | 128.38                                                                         |
| Frequency         |                                                                                |
| Spectral Width    | 25510.2                                                                        |
| Lowest Frequency  | -12754.9                                                                       |
| Nucleus           | $^{11}\text{B}$                                                                |
| Acquired Size     | 32768                                                                          |
| Spectral Size     | 65536                                                                          |

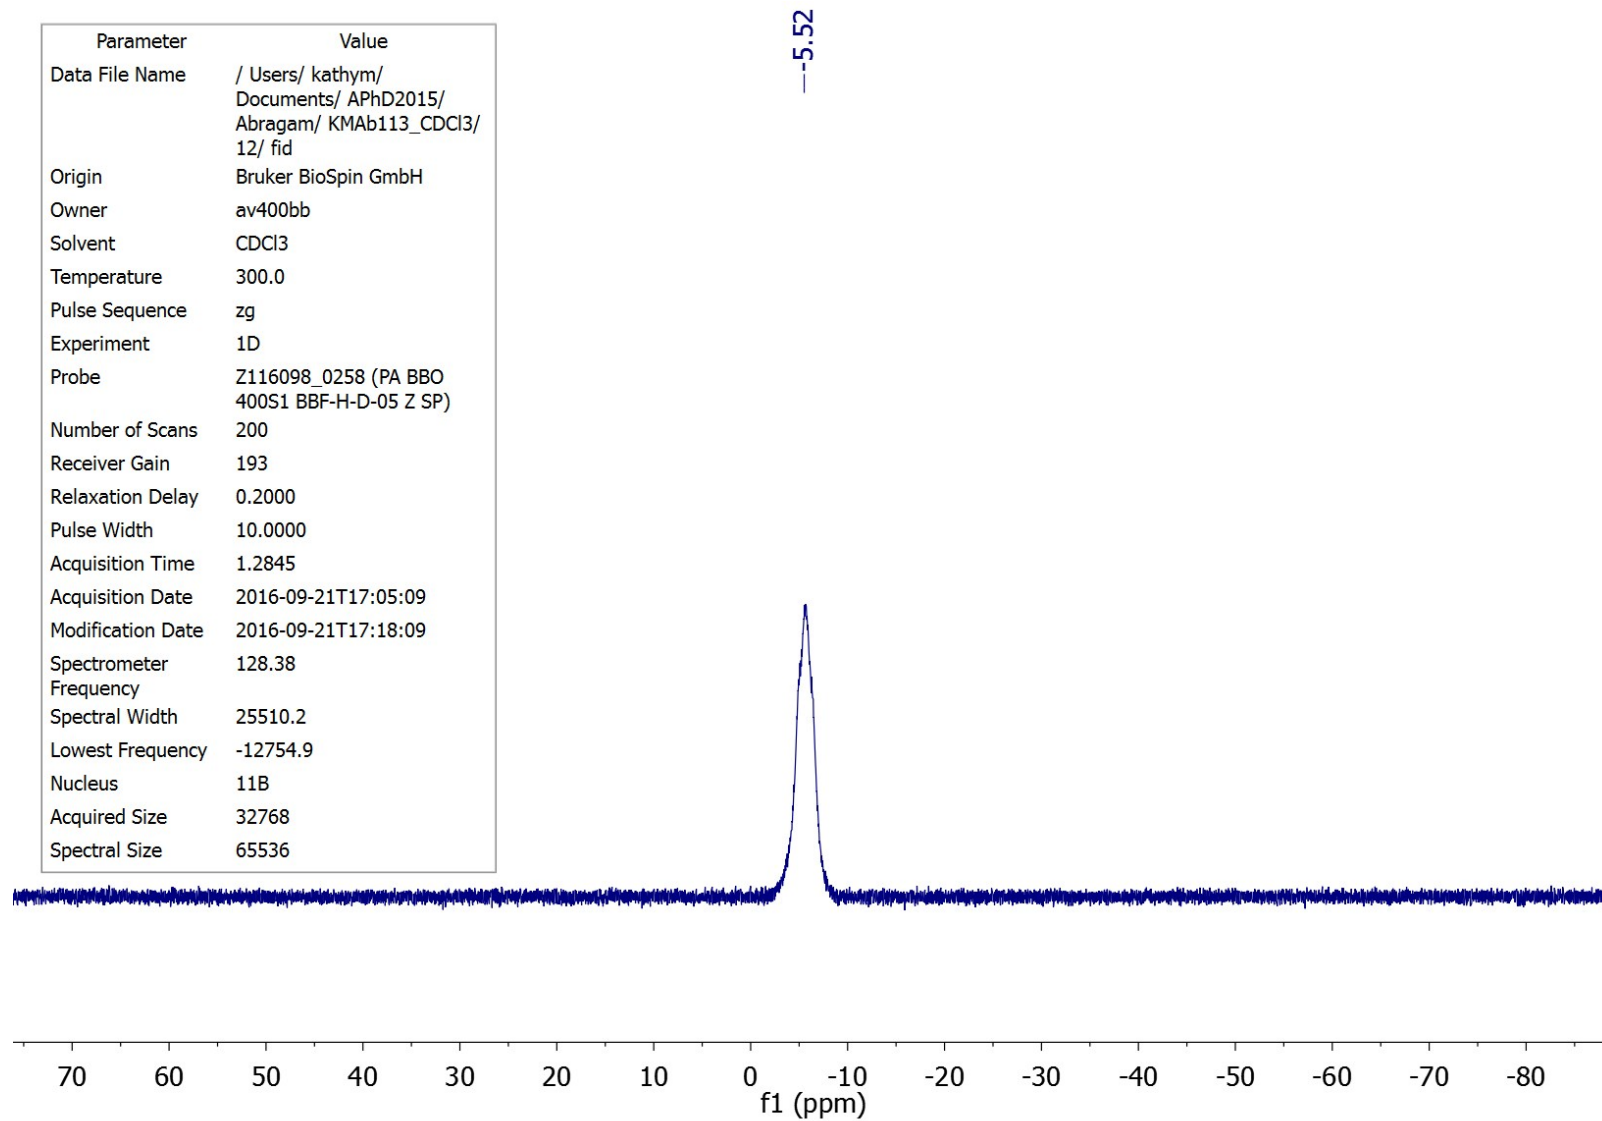

### $^{31}\text{P}\{^1\text{H}\}$ NMR Spectrum of 3a

| Parameter         | Value                                                                           |
|-------------------|---------------------------------------------------------------------------------|
| Data File Name    | / Users/ kathym/<br>Documents/ APhD2015/<br>Abragam/<br>KMAb113a_CDCl3/ 11/ fid |
| Origin            | Bruker BioSpin GmbH                                                             |
| Owner             | av400bb                                                                         |
| Solvent           | CDCl3                                                                           |
| Temperature       | 300.0                                                                           |
| Pulse Sequence    | zgpg30                                                                          |
| Experiment        | 1D                                                                              |
| Probe             | Z116098_0258 (PA BBO<br>400S1 BBF-H-D-05 Z SP)                                  |
| Number of Scans   | 64                                                                              |
| Receiver Gain     | 193                                                                             |
| Relaxation Delay  | 2.0000                                                                          |
| Pulse Width       | 8.0000                                                                          |
| Acquisition Time  | 0.5112                                                                          |
| Acquisition Date  | 2016-12-07T15:44:32                                                             |
| Modification Date | 2016-12-07T15:46:43                                                             |
| Spectrometer      | 161.97                                                                          |
| Frequency         |                                                                                 |
| Spectral Width    | 64102.6                                                                         |
| Lowest Frequency  | -40150.1                                                                        |
| Nucleus           | $^{31}\text{P}$                                                                 |
| Acquired Size     | 32768                                                                           |
| Spectral Size     | 65536                                                                           |

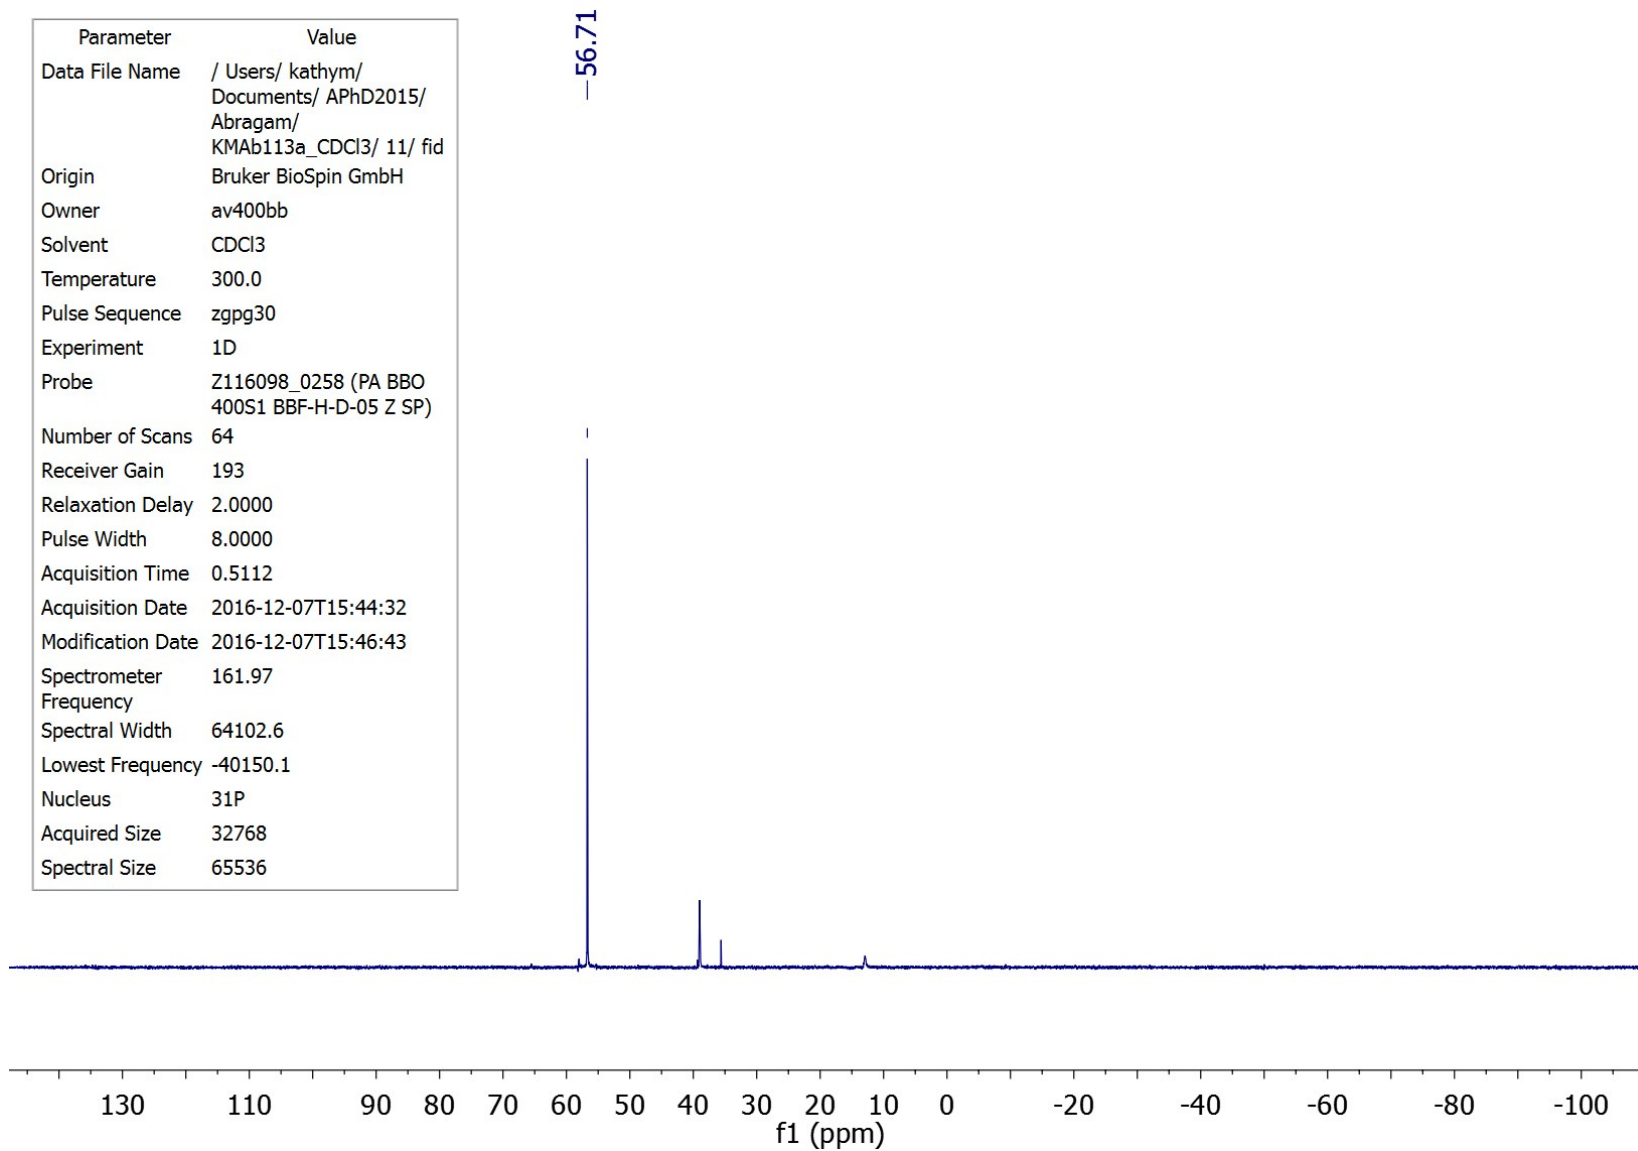

# <sup>13</sup>C{<sup>1</sup>H} NMR Spectrum of 3a

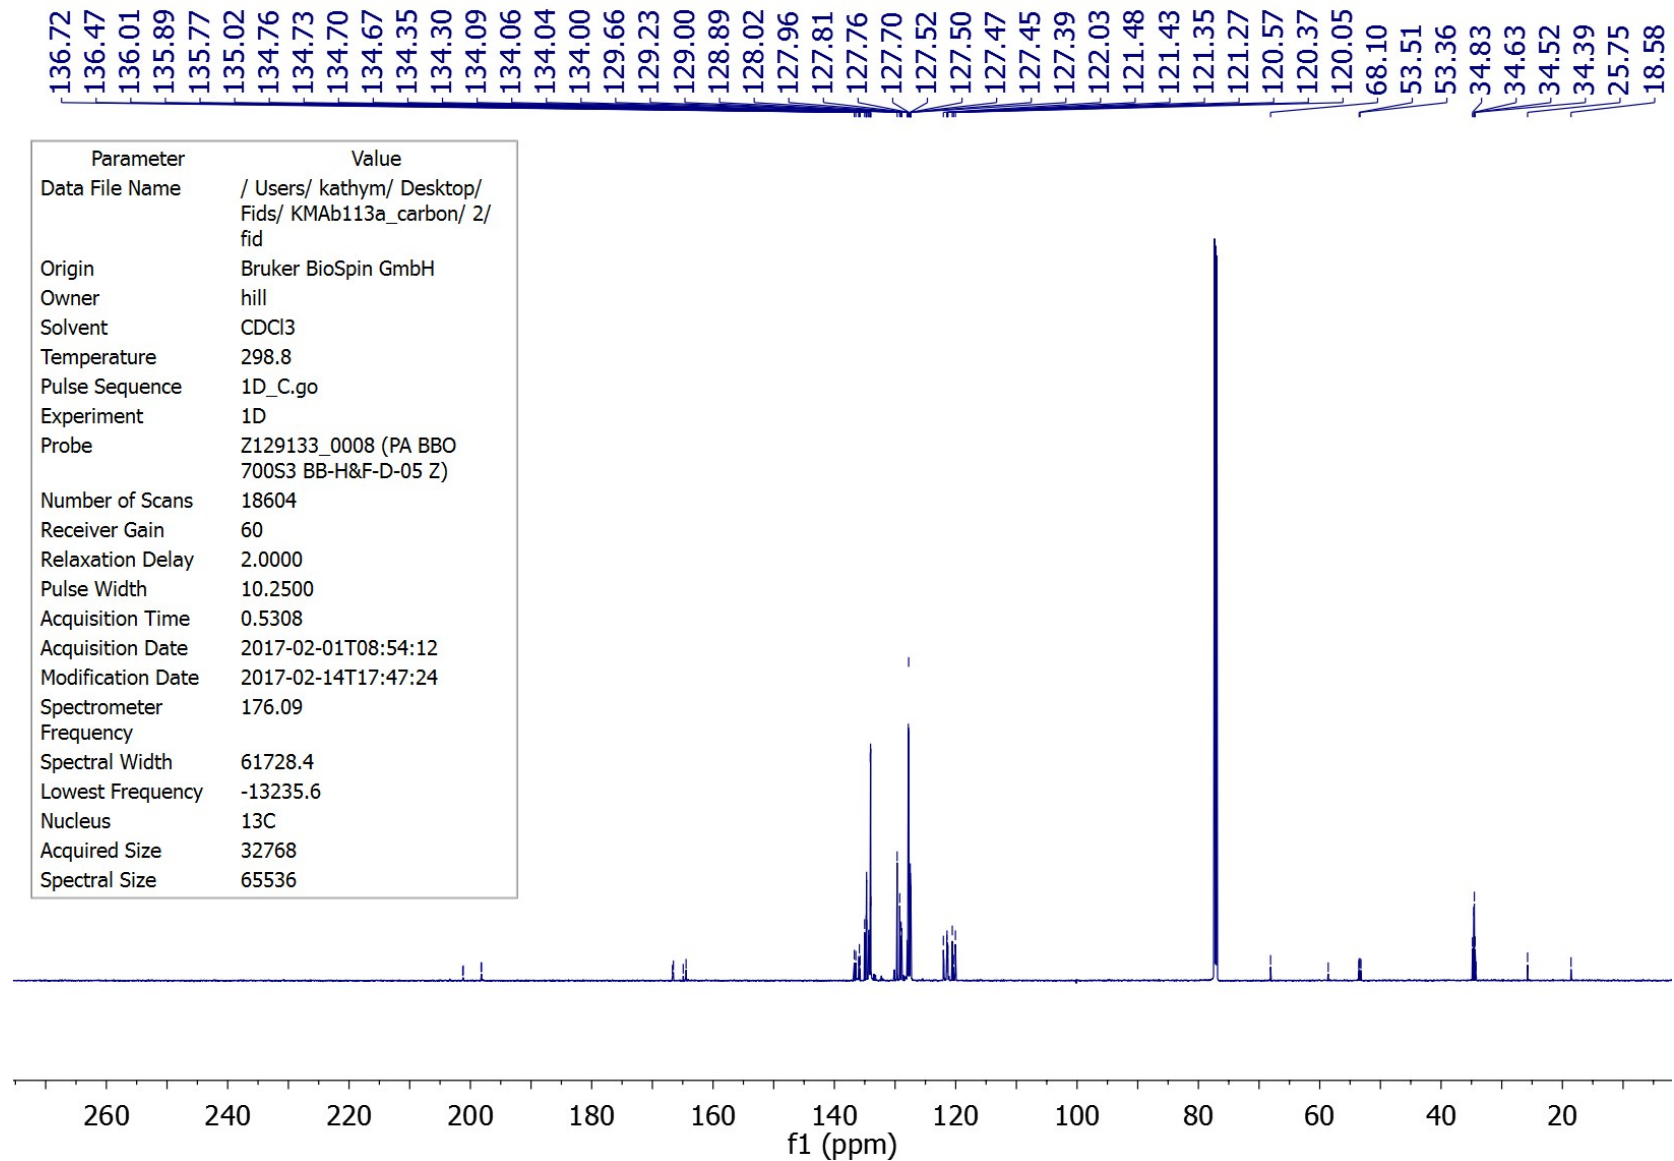

### $^{13}\text{C}\{^1\text{H}\}$ NMR Spectrum of 3a (Phosphine Region)

| Parameter         | Value                                                         |
|-------------------|---------------------------------------------------------------|
| Data File Name    | / Users/ kathym/<br>Desktop/ Fids/<br>KMAb113a_carbon/ 2/ fid |
| Origin            | Bruker BioSpin GmbH                                           |
| Owner             | hill                                                          |
| Solvent           | $\text{CDCl}_3$                                               |
| Temperature       | 298.8                                                         |
| Pulse Sequence    | 1D_C.go                                                       |
| Experiment        | 1D                                                            |
| Probe             | Z129133_0008 (PA BBO<br>700S3 BB-H&F-D-05 Z)                  |
| Number of Scans   | 18604                                                         |
| Receiver Gain     | 60                                                            |
| Relaxation Delay  | 2.0000                                                        |
| Pulse Width       | 10.2500                                                       |
| Acquisition Time  | 0.5308                                                        |
| Acquisition Date  | 2017-02-01T08:54:12                                           |
| Modification Date | 2017-02-14T17:47:24                                           |
| Spectrometer      | 176.09                                                        |
| Frequency         |                                                               |
| Spectral Width    | 61728.4                                                       |
| Lowest Frequency  | -13235.6                                                      |
| Nucleus           | $^{13}\text{C}$                                               |
| Acquired Size     | 32768                                                         |
| Spectral Size     | 65536                                                         |

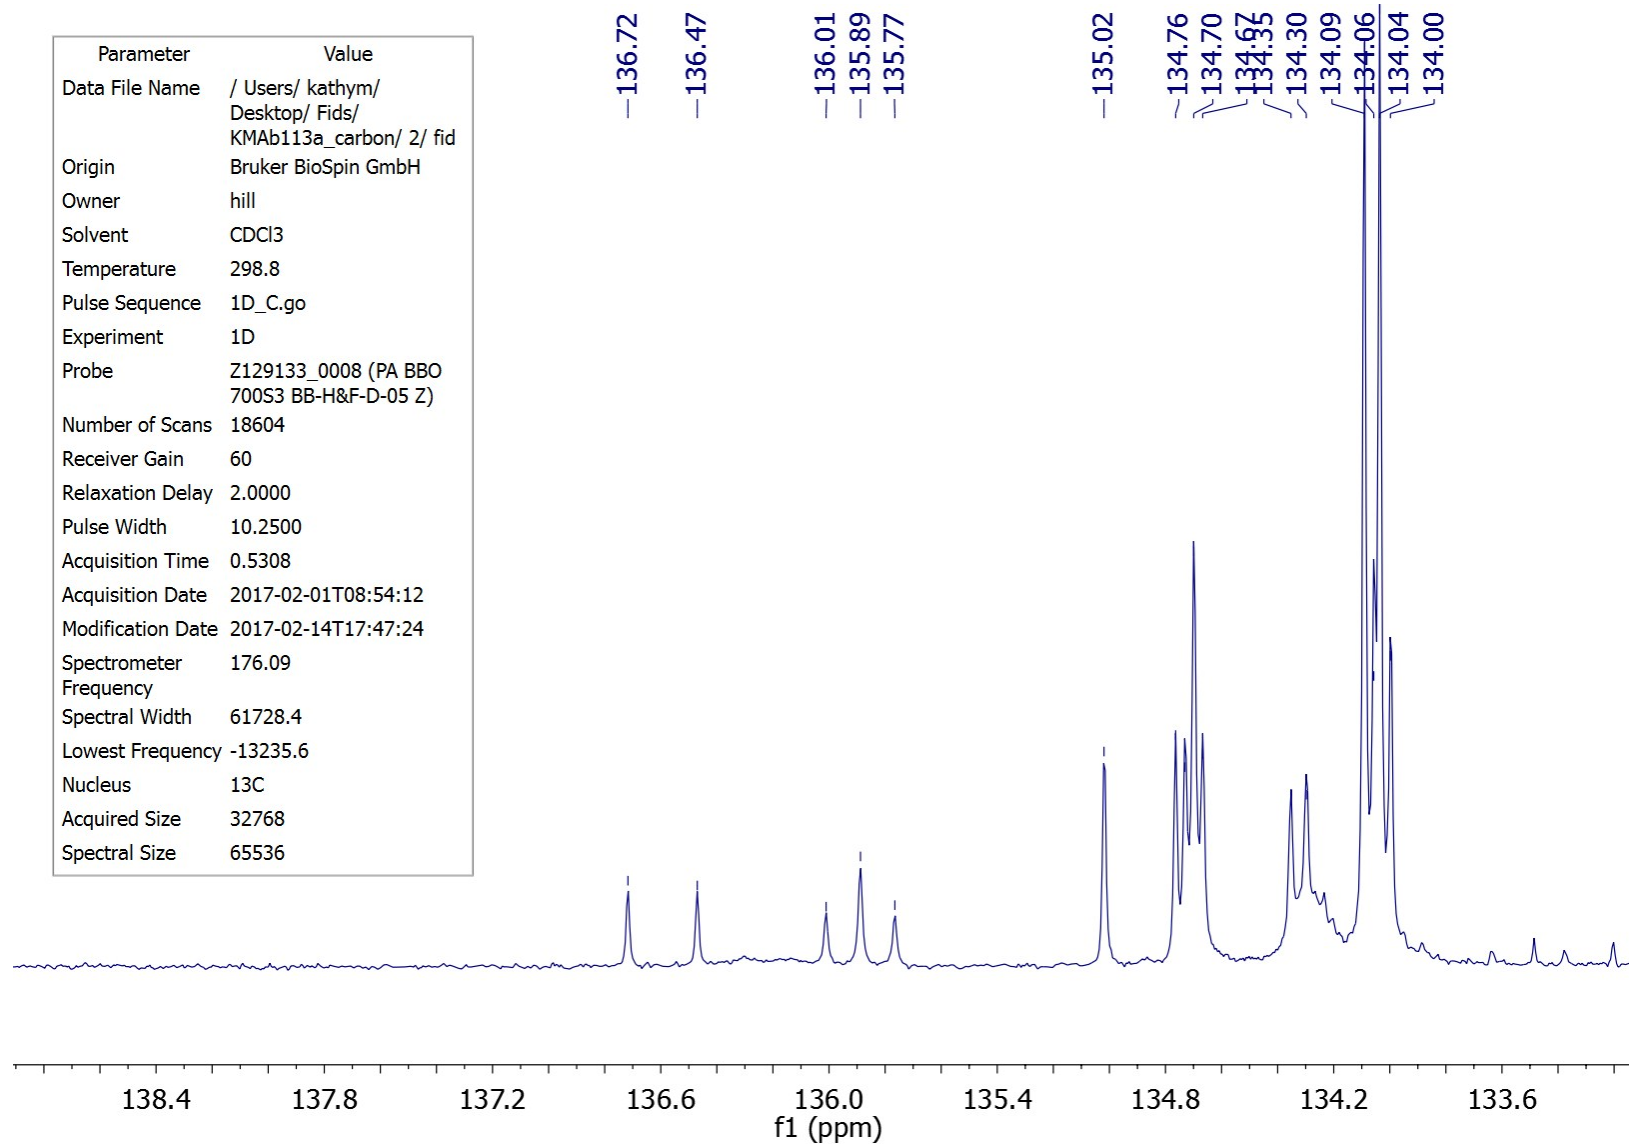

Characterisation of  $[\text{RuCl}(\text{CO})(\text{PPh}_3)_2\{\text{H}_2\text{B}(\text{mt})_2\}]$  (3b)



# <sup>1</sup>H NMR Spectrum of 3b

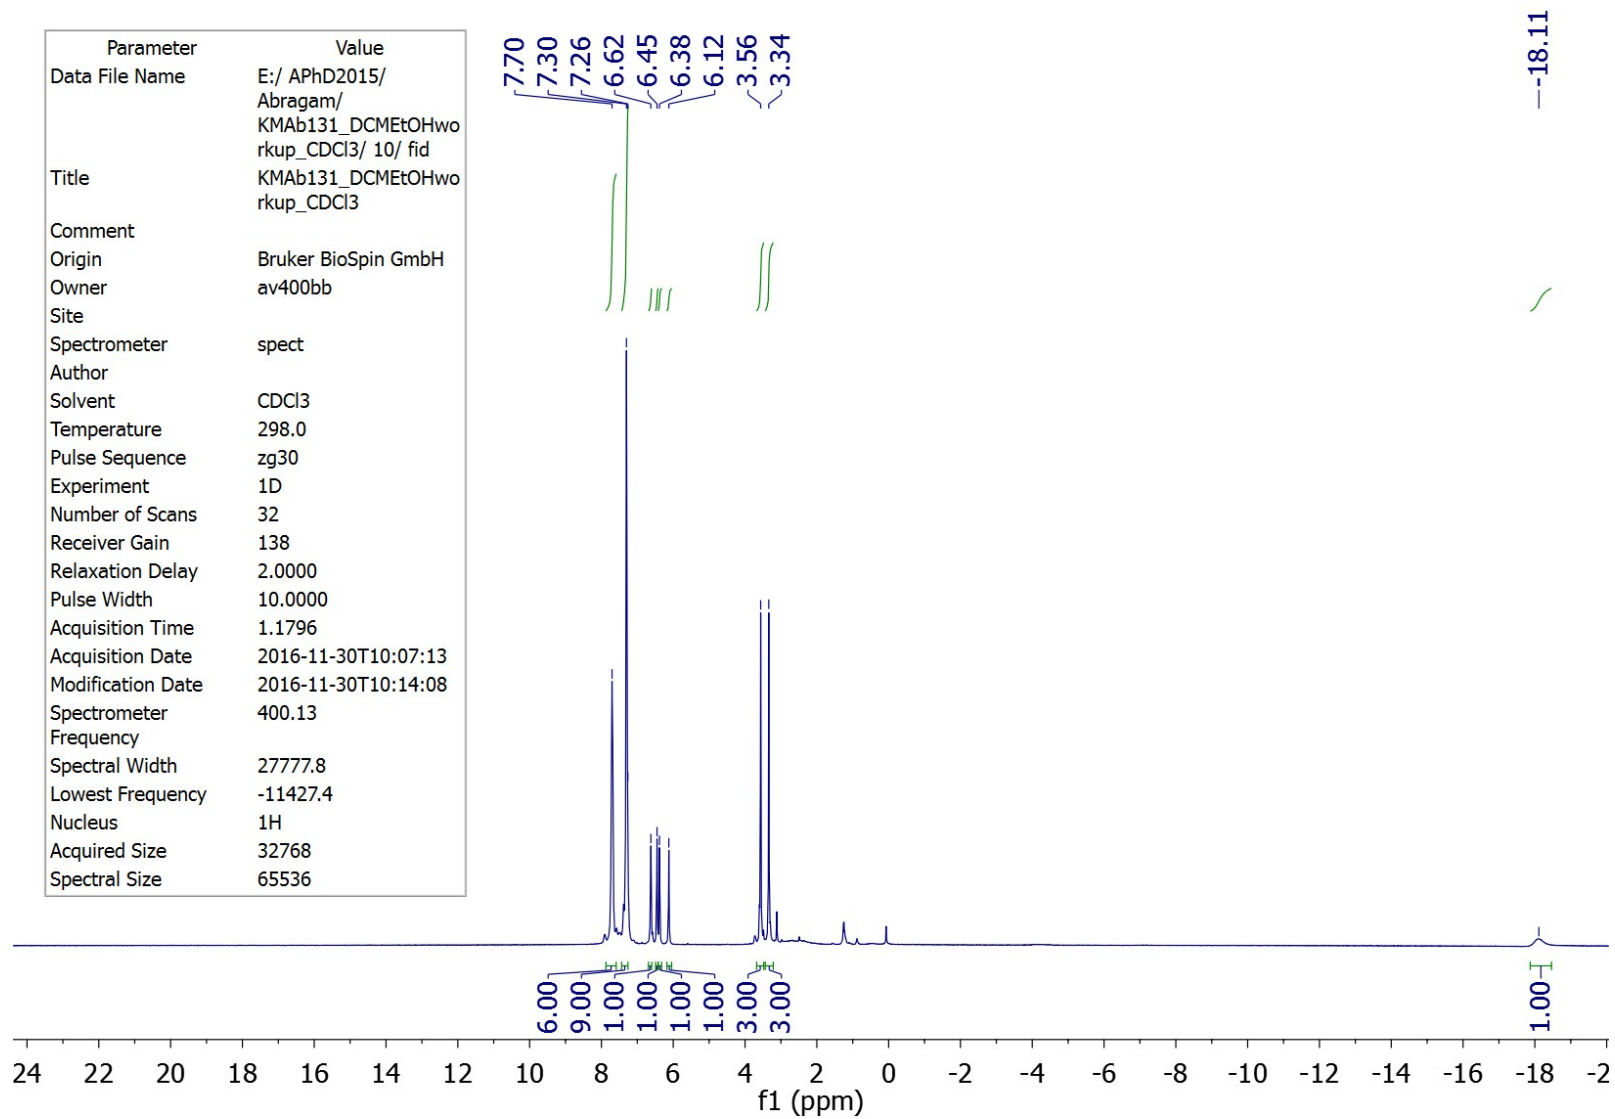

# <sup>1</sup>H NMR Spectrum of 3b (Expansion)

| Parameter         | Value                                                                 |
|-------------------|-----------------------------------------------------------------------|
| Data File Name    | E:/ APHD2015/<br>Abragam/<br>KMAb131_DCMEtOHwo<br>rkup_CDCl3/ 10/ fid |
| Title             | KMAb131_DCMEtOHwo<br>rkup_CDCl3                                       |
| Comment           |                                                                       |
| Origin            | Bruker BioSpin GmbH                                                   |
| Owner             | av400bb                                                               |
| Site              |                                                                       |
| Spectrometer      | spect                                                                 |
| Author            |                                                                       |
| Solvent           | CDCl3                                                                 |
| Temperature       | 298.0                                                                 |
| Pulse Sequence    | zg30                                                                  |
| Experiment        | 1D                                                                    |
| Number of Scans   | 32                                                                    |
| Receiver Gain     | 138                                                                   |
| Relaxation Delay  | 2.0000                                                                |
| Pulse Width       | 10.0000                                                               |
| Acquisition Time  | 1.1796                                                                |
| Acquisition Date  | 2016-11-30T10:07:13                                                   |
| Modification Date | 2016-11-30T10:14:08                                                   |
| Spectrometer      | 400.13                                                                |
| Frequency         |                                                                       |
| Spectral Width    | 27777.8                                                               |
| Lowest Frequency  | -11427.4                                                              |
| Nucleus           | 1H                                                                    |
| Acquired Size     | 32768                                                                 |
| Spectral Size     | 65536                                                                 |

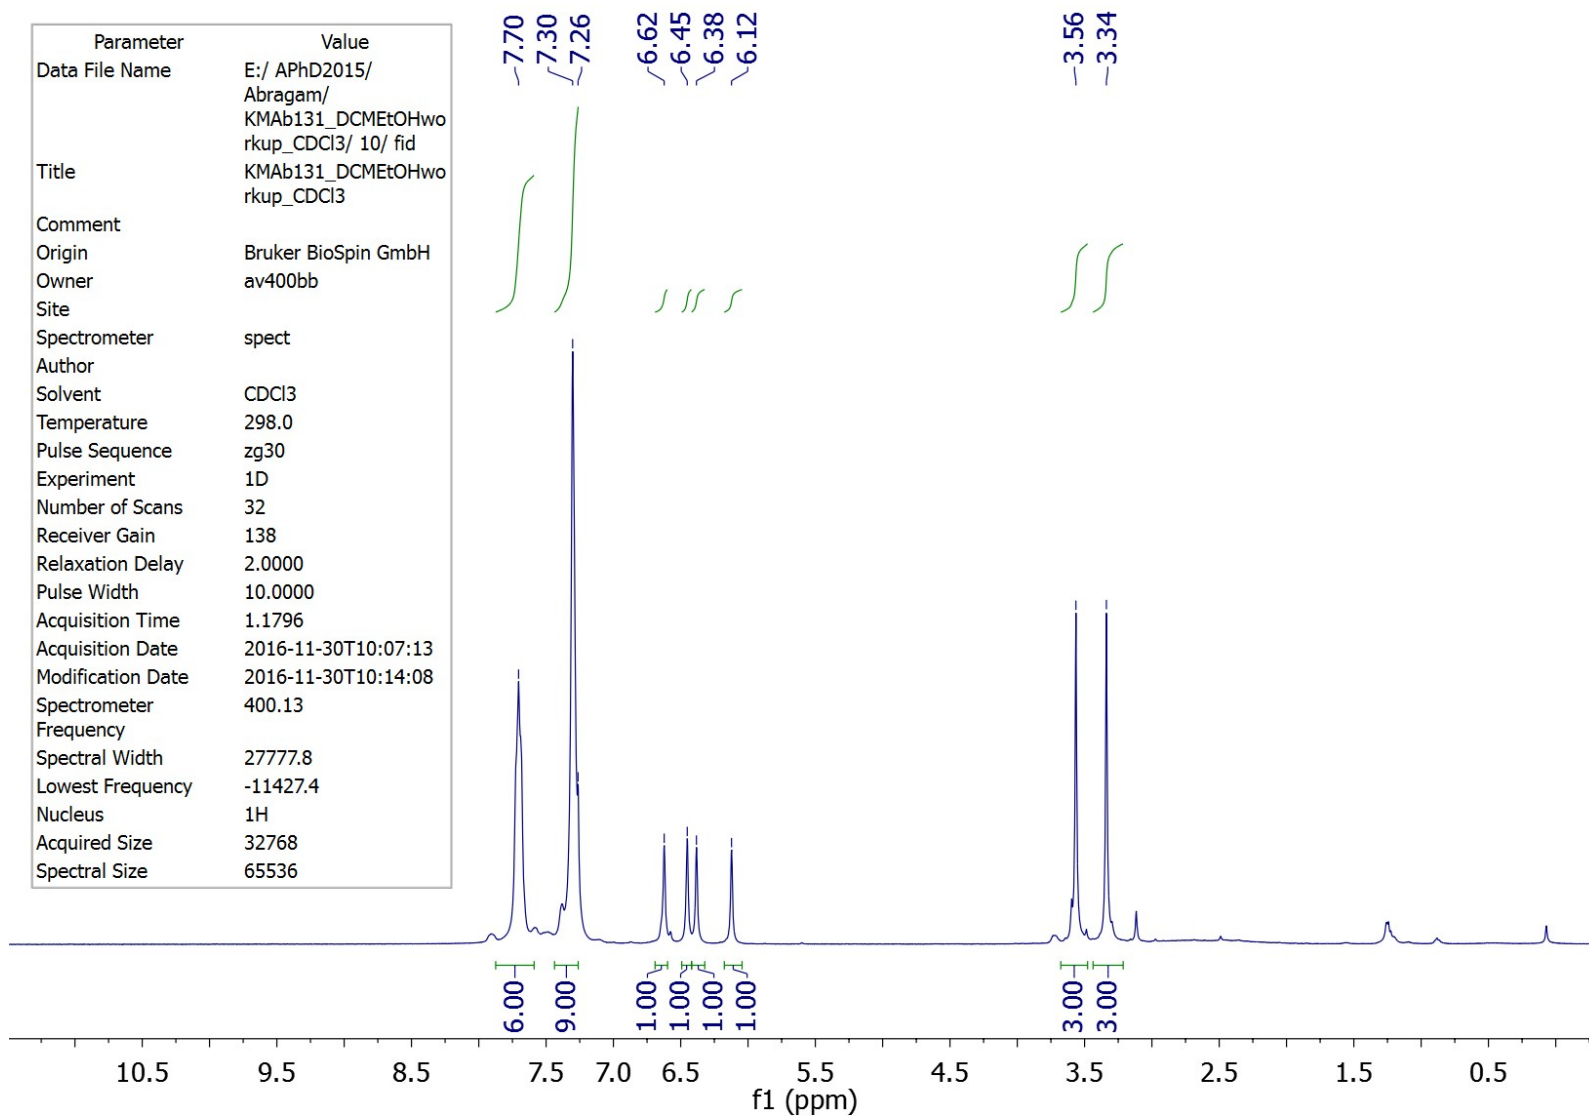

# $^{11}\text{B}\{^1\text{H}\}$ NMR Spectrum of 3b

| Parameter         | Value                                                               |
|-------------------|---------------------------------------------------------------------|
| Data File Name    | E:/ APhD2015/ Abragam/<br>KMAb131_furtherEtOHwash_CDCl3/ 12/<br>fid |
| Title             | KMAb131_furtherEtOHwash_CDCl3                                       |
| Origin            | Bruker BioSpin GmbH                                                 |
| Owner             | av400bb                                                             |
| Solvent           | CDCl3                                                               |
| Temperature       | 300.0                                                               |
| Pulse Sequence    | zg                                                                  |
| Experiment        | 1D                                                                  |
| Number of Scans   | 200                                                                 |
| Receiver Gain     | 193                                                                 |
| Relaxation Delay  | 0.2000                                                              |
| Pulse Width       | 10.0000                                                             |
| Acquisition Time  | 1.2845                                                              |
| Acquisition Date  | 2016-11-30T12:14:01                                                 |
| Modification Date | 2016-11-30T12:36:46                                                 |
| Spectrometer      | 128.38                                                              |
| Frequency         |                                                                     |
| Spectral Width    | 25510.2                                                             |
| Lowest            | -12763.4                                                            |
| Frequency         |                                                                     |
| Nucleus           | $^{11}\text{B}$                                                     |
| Acquired Size     | 32768                                                               |
| Spectral Size     | 65536                                                               |

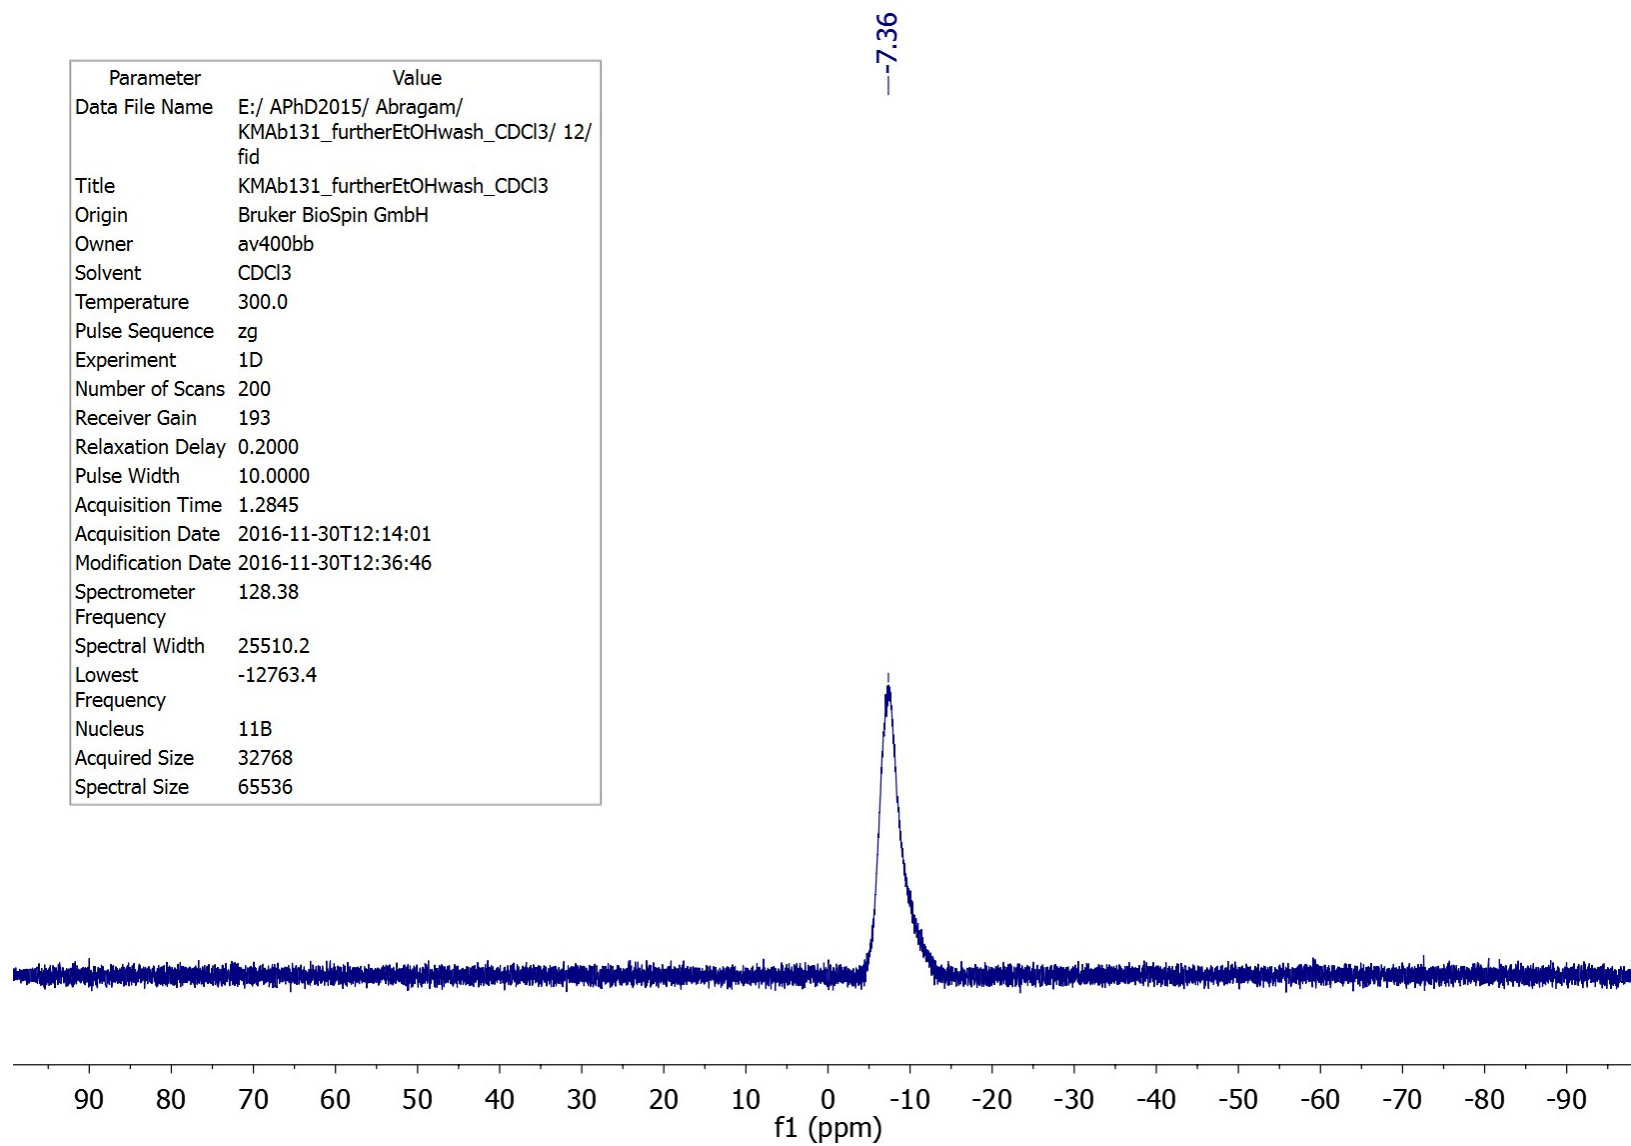

### $^{31}\text{P}\{^1\text{H}\}$ NMR Spectrum of 3b

| Parameter         | Value                                                             |
|-------------------|-------------------------------------------------------------------|
| Data File Name    | E:/ APhD2015/ Abragam/<br>KMAb131_DCMetOHworkup_CDCl3/ 11/<br>fid |
| Title             | KMAb131_DCMetOHworkup_CDCl3                                       |
| Origin            | Bruker BioSpin GmbH                                               |
| Owner             | av400bb                                                           |
| Solvent           | CDCl3                                                             |
| Temperature       | 300.0                                                             |
| Pulse Sequence    | zgpg30                                                            |
| Experiment        | 1D                                                                |
| Number of Scans   | 64                                                                |
| Receiver Gain     | 193                                                               |
| Relaxation Delay  | 2.0000                                                            |
| Pulse Width       | 8.0000                                                            |
| Acquisition Time  | 0.5112                                                            |
| Acquisition Date  | 2016-11-30T10:13:57                                               |
| Modification Date | 2016-11-30T10:14:08                                               |
| Spectrometer      | 161.98                                                            |
| Frequency         |                                                                   |
| Spectral Width    | 64102.6                                                           |
| Lowest            | -39986.0                                                          |
| Frequency         |                                                                   |
| Nucleus           | $^{31}\text{P}$                                                   |
| Acquired Size     | 32768                                                             |
| Spectral Size     | 65536                                                             |

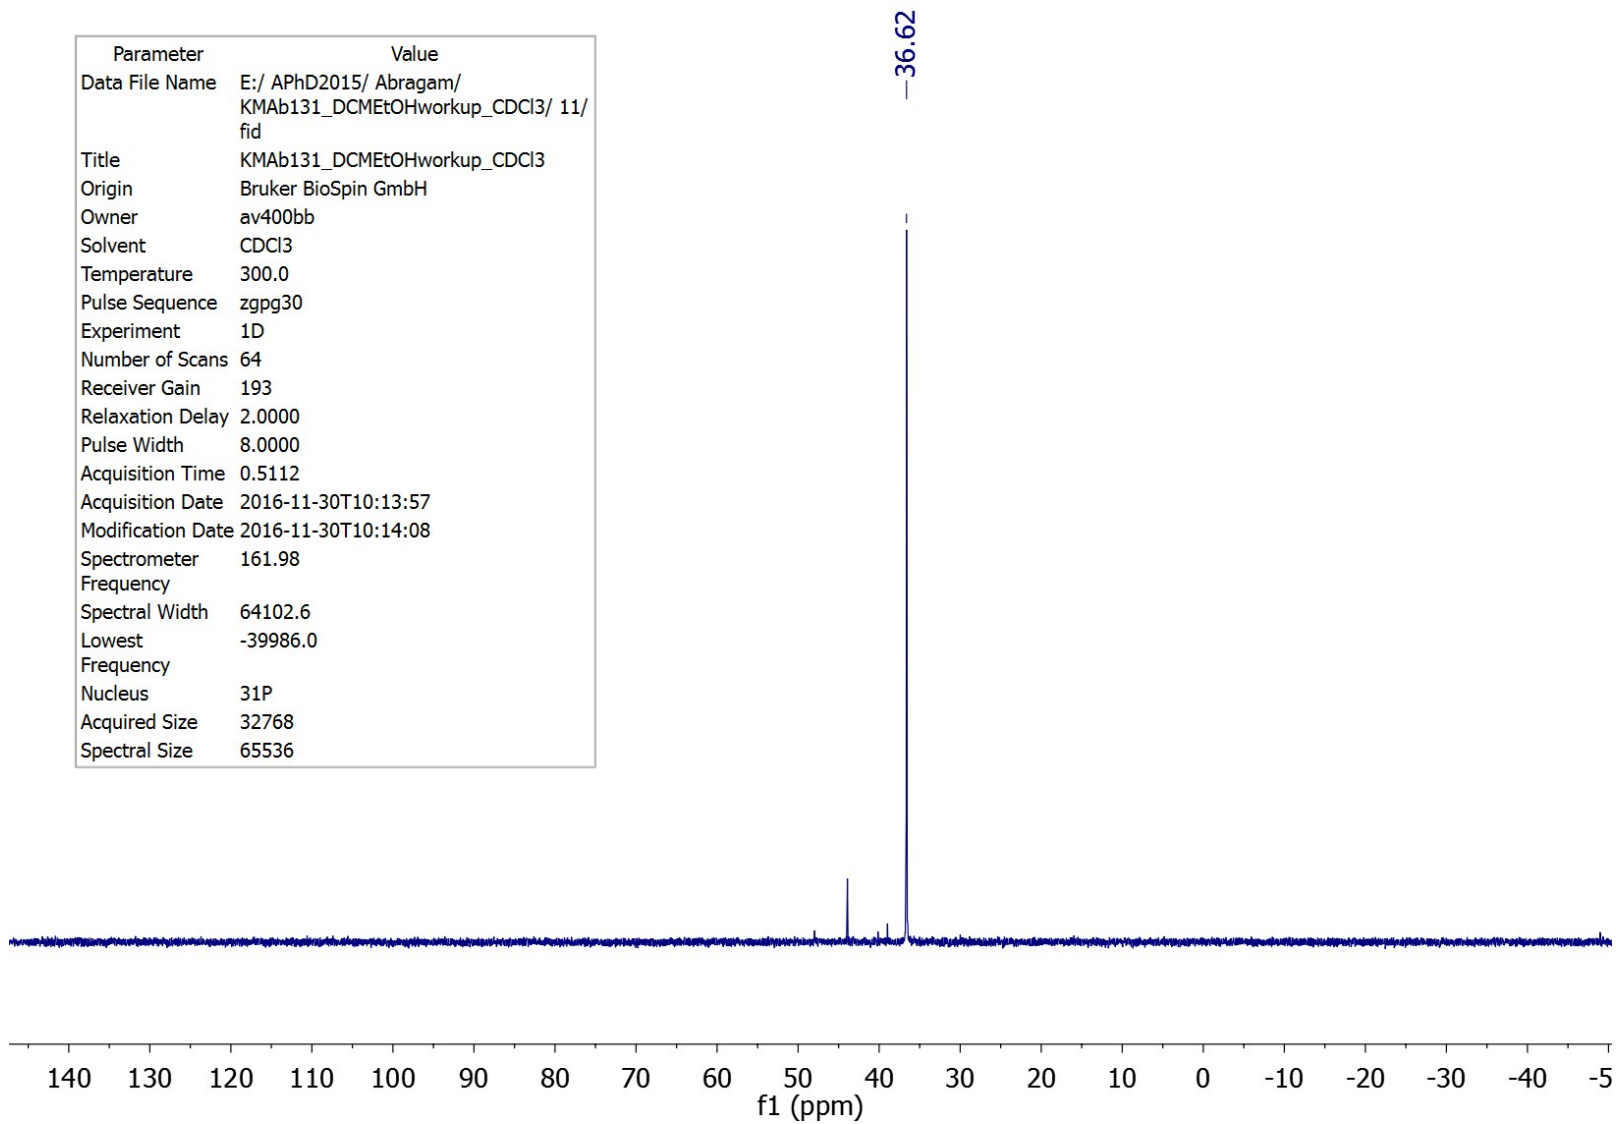

# <sup>13</sup>C{<sup>1</sup>H} NMR Spectrum of 3b

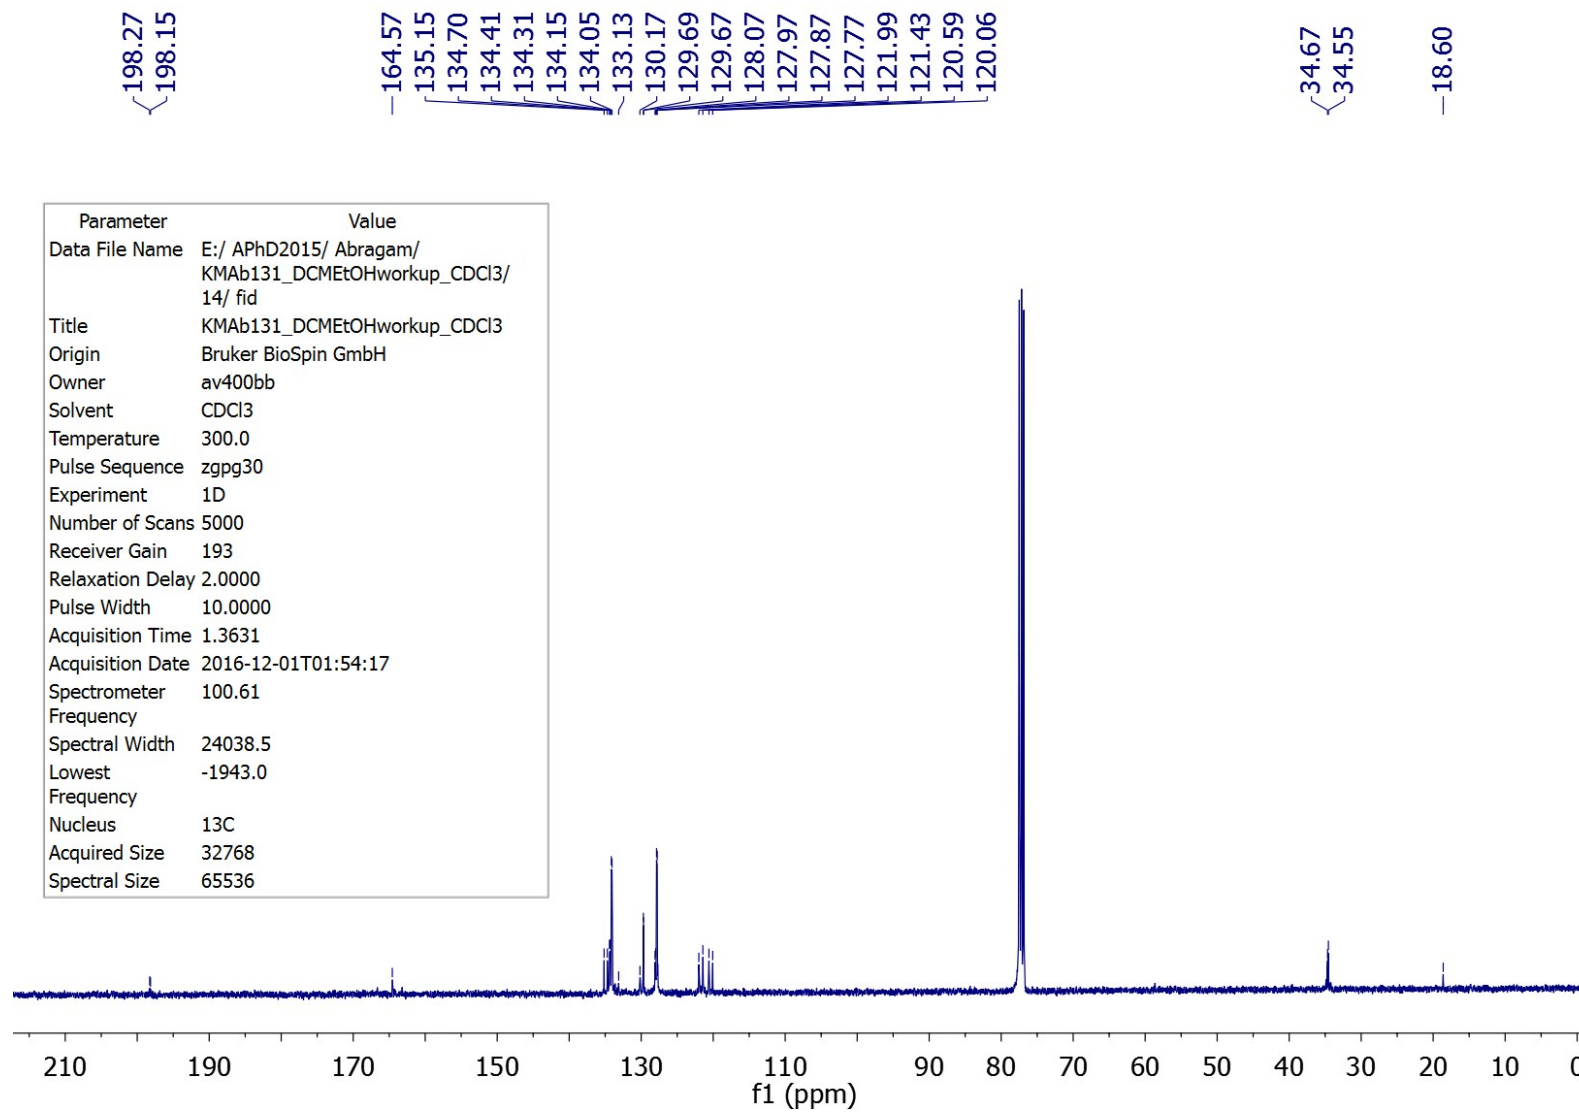

# $^{13}\text{C}\{^1\text{H}\}$ NMR Spectrum of 3b (Expansion)

| Parameter              | Value                                                       |
|------------------------|-------------------------------------------------------------|
| Data File Name         | E:/ APhD2015/ Abragam/ KMAB131_DCMEtOHworkup_CDCl3/ 14/ fid |
| Title                  | KMAB131_DCMEtOHworkup_CDCl3                                 |
| Origin                 | Bruker BioSpin GmbH                                         |
| Owner                  | av400bb                                                     |
| Solvent                | CDCl3                                                       |
| Temperature            | 300.0                                                       |
| Pulse                  | zgpg30                                                      |
| Sequence               |                                                             |
| Experiment             | 1D                                                          |
| Number of Scans        | 5000                                                        |
| Receiver Gain          | 193                                                         |
| Relaxation Delay       | 2.0000                                                      |
| Pulse Width            | 10.0000                                                     |
| Acquisition Time       | 1.3631                                                      |
| Acquisition Date       | 2016-12-01T01:54:17                                         |
| Spectrometer Frequency | 100.61                                                      |
| Spectral Width         | 24038.5                                                     |
| Lowest Frequency       | -1943.0                                                     |
| Nucleus                | $^{13}\text{C}$                                             |
| Acquired Size          | 32768                                                       |
| Spectral Size          | 65536                                                       |

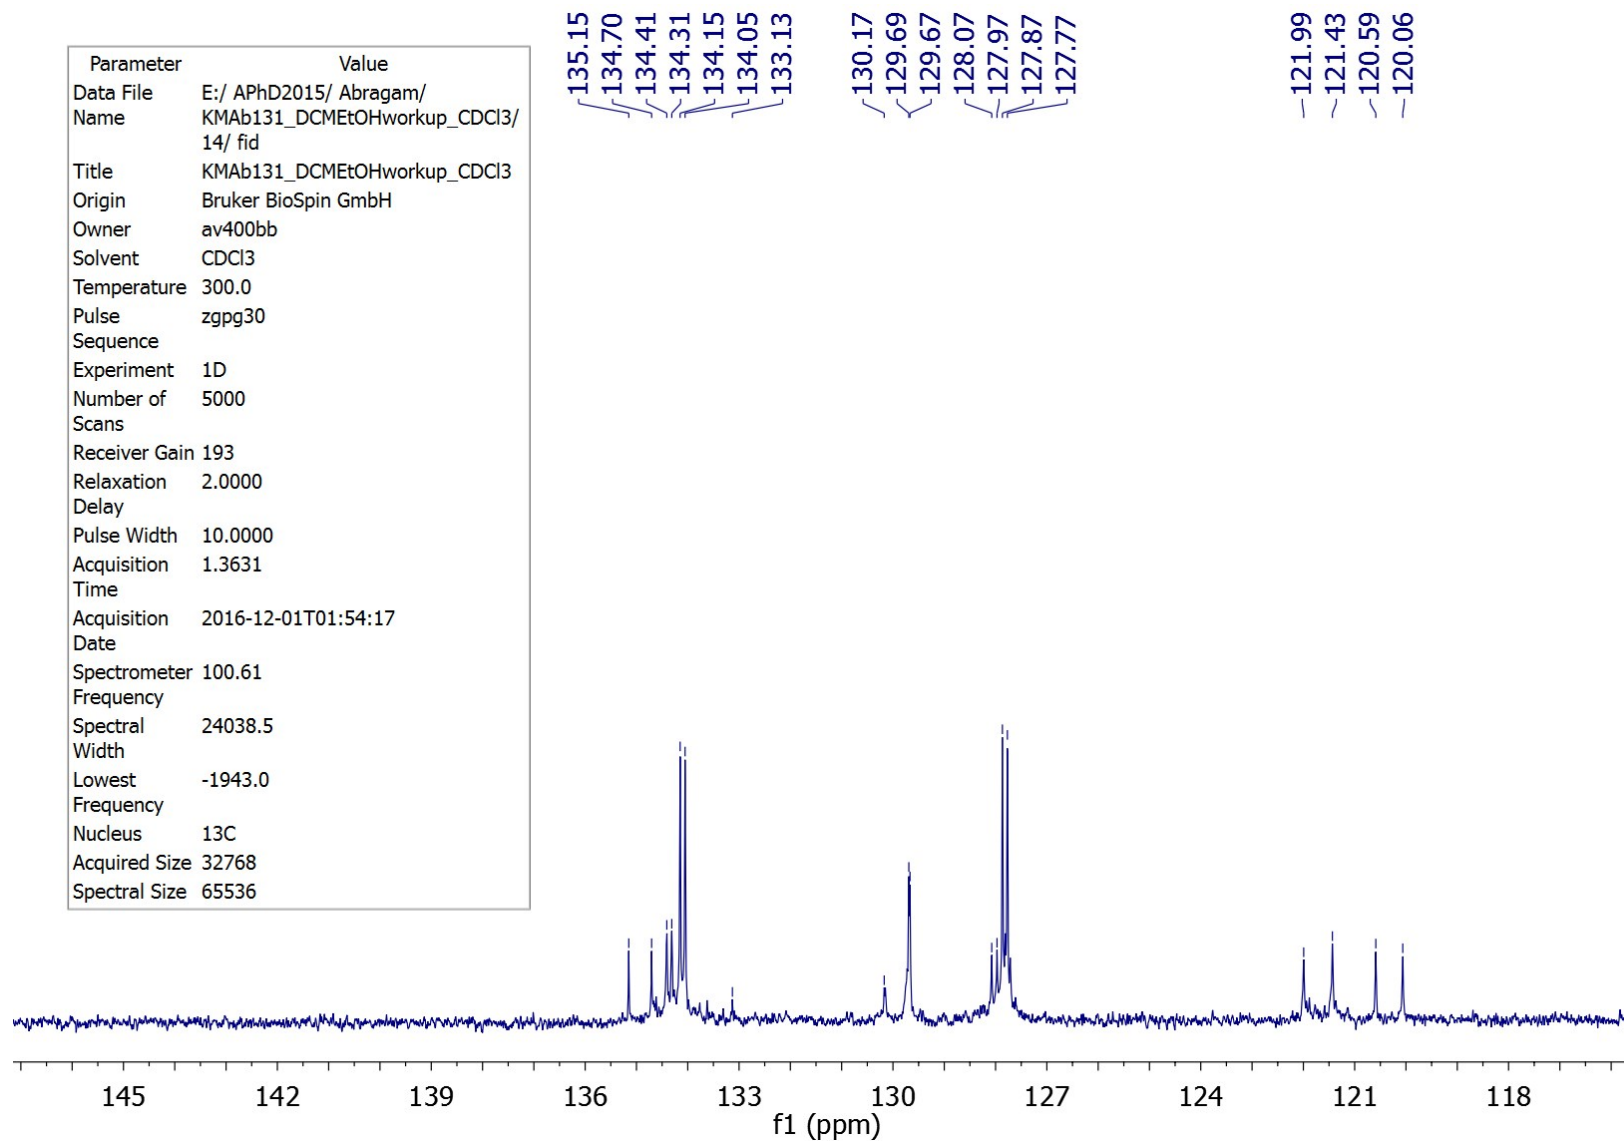

## Characterisation of $[\text{Ru}(\text{SePh})(\text{CO})(\text{PPh}_3)_3\{\text{H}_2\text{B}(\text{mt})_2\}]$ (**3c**)

### Commentary

Spectroscopic data for **3b** call for little comment other than to note the conspicuous loss of the hydride doublet resonance in the  $^1\text{H}$  NMR spectrum, whilst the broad B–H–Ru resonance shifts to  $\delta_{\text{H}} = -18.11$ .

# <sup>1</sup>H NMR Spectrum of 3c

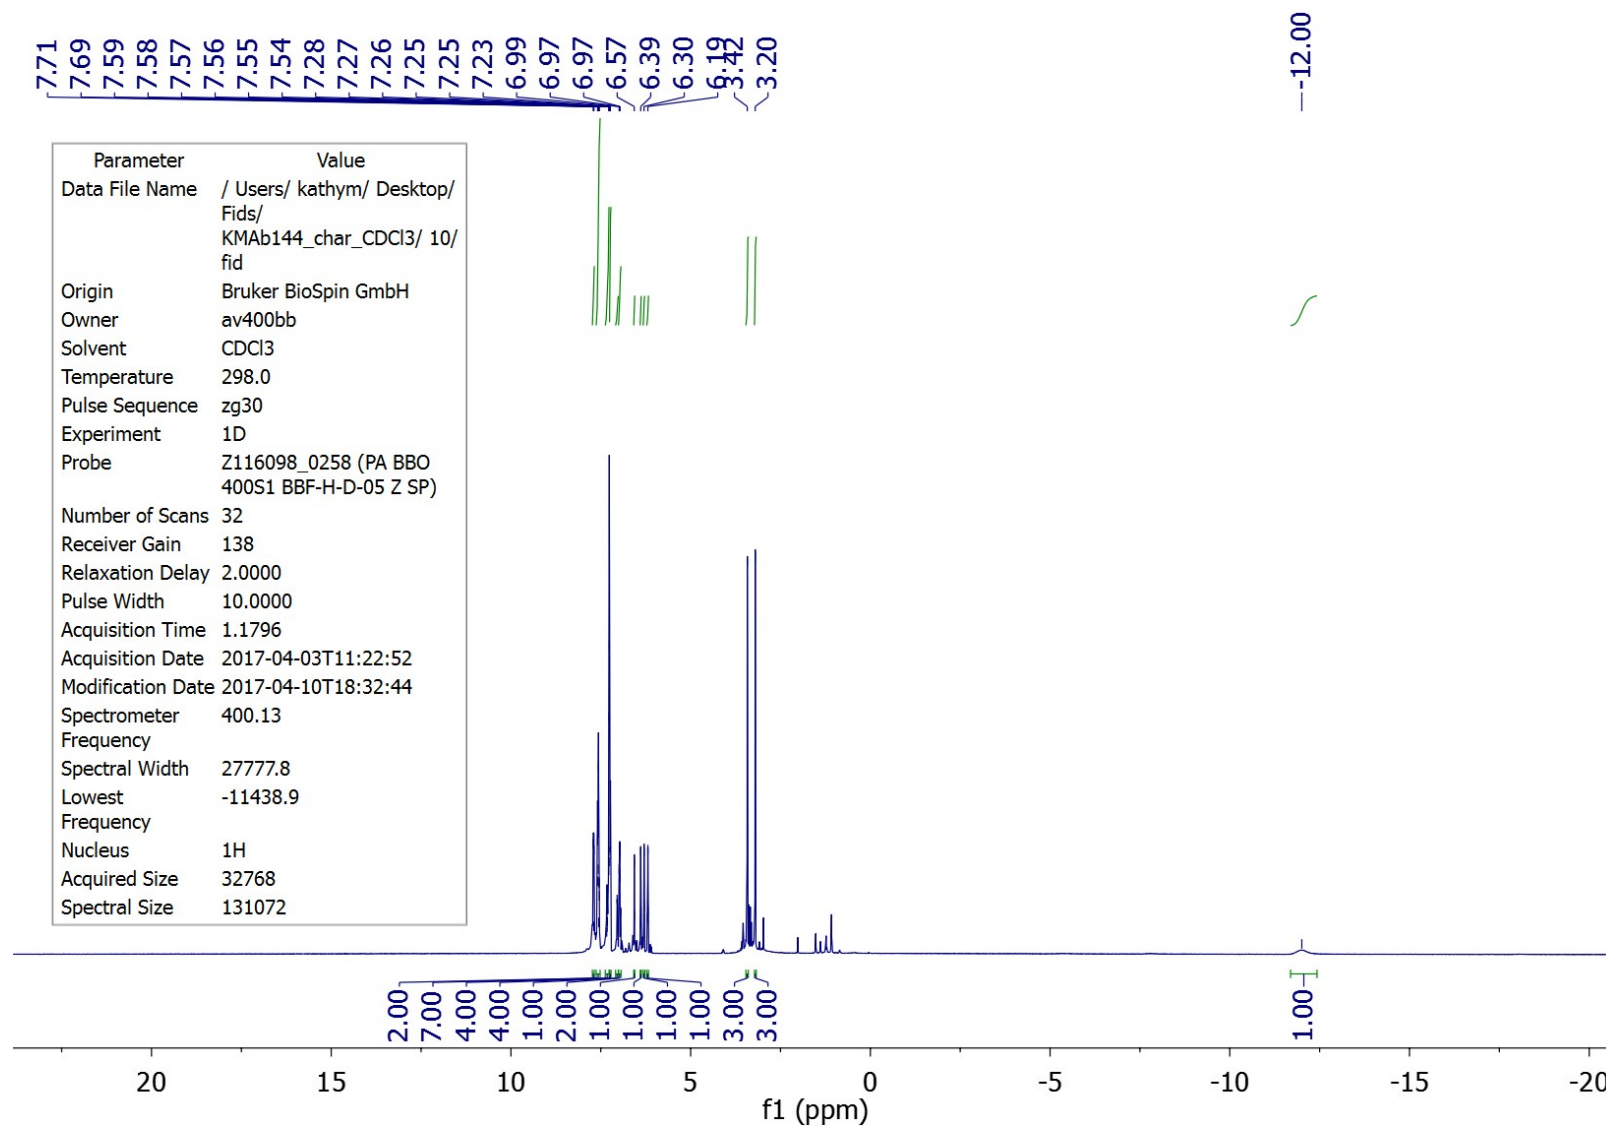



# <sup>1</sup>H NMR Spectrum of 3c (Expansion)

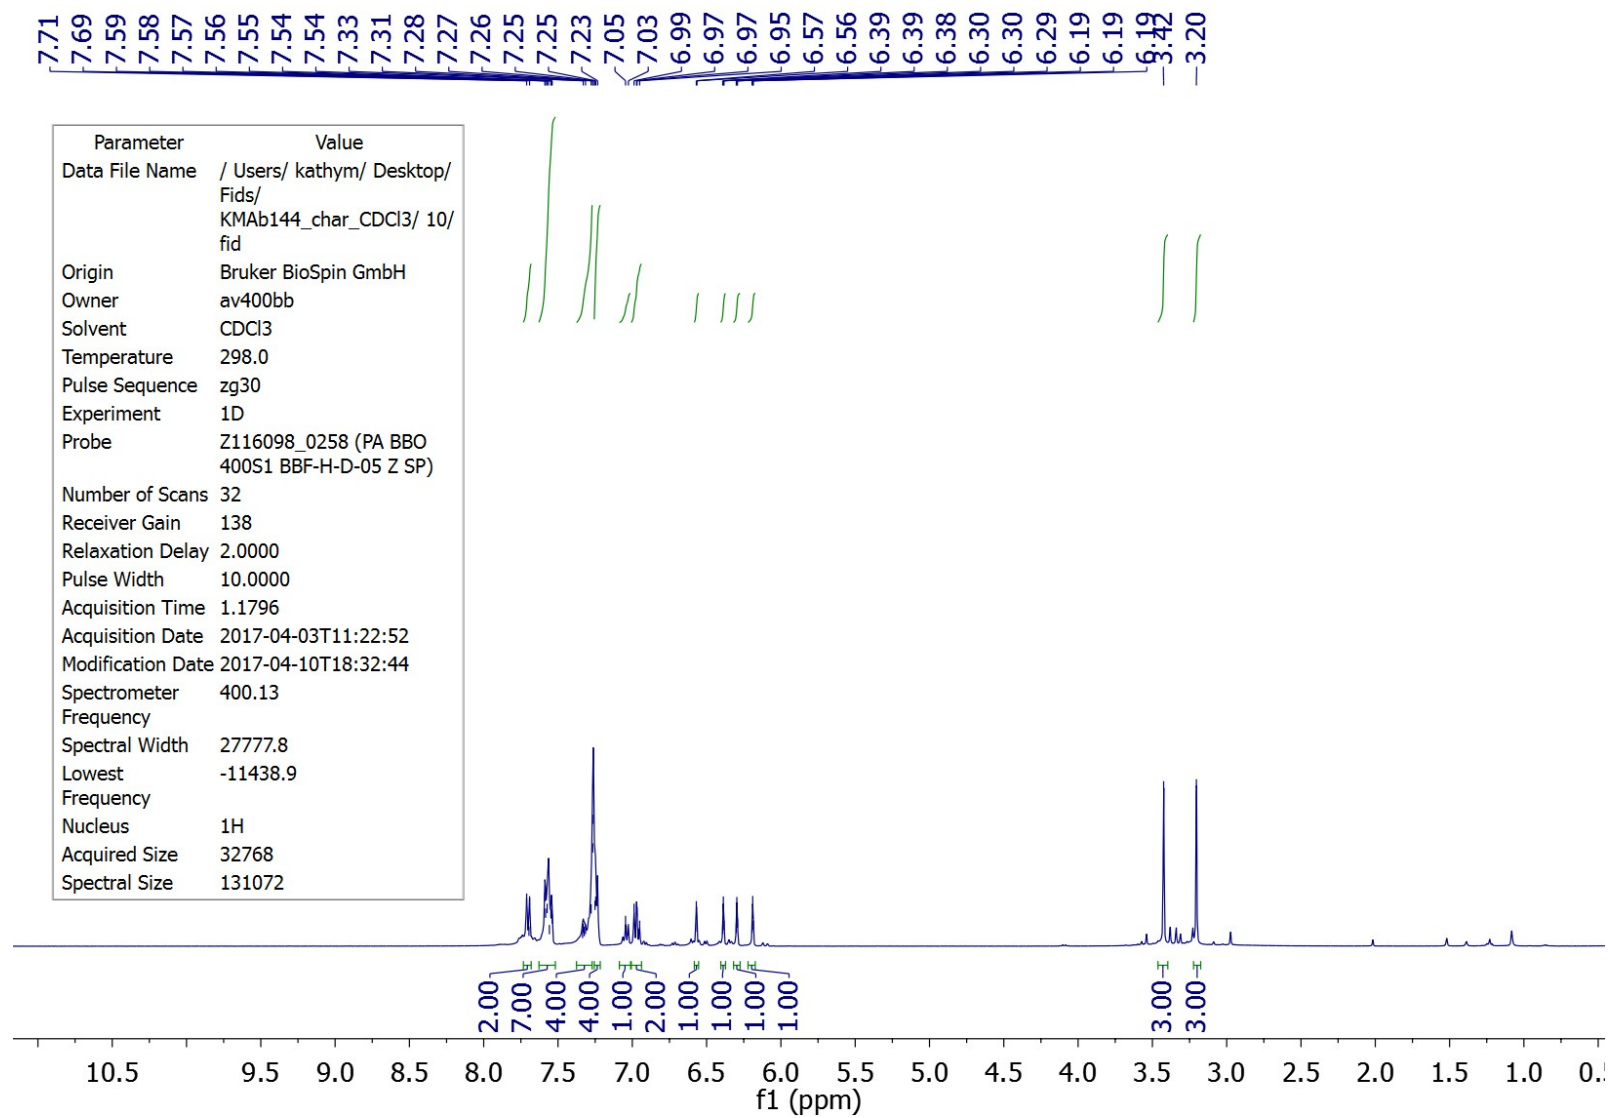

# $^{11}\text{B}\{^1\text{H}\}$ NMR Spectrum of 3c

| Parameter         | Value                                                       |
|-------------------|-------------------------------------------------------------|
| Data File Name    | / Users/ kathym/ Desktop/ Fids/ KMAB144_char_CDCl3/ 13/ fid |
| Origin            | Bruker BioSpin GmbH                                         |
| Owner             | av400bb                                                     |
| Solvent           | CDCl3                                                       |
| Temperature       | 300.0                                                       |
| Pulse Sequence    | zgpg                                                        |
| Experiment        | 1D                                                          |
| Probe             | Z116098_0258 (PA BBO 400S1 BBF-H-D-05 Z SP)                 |
| Number of Scans   | 200                                                         |
| Receiver Gain     | 193                                                         |
| Relaxation Delay  | 0.2000                                                      |
| Pulse Width       | 10.0000                                                     |
| Acquisition Time  | 1.2845                                                      |
| Acquisition Date  | 2017-04-03T11:45:02                                         |
| Modification Date | 2017-04-10T18:32:44                                         |
| Spectrometer      | 128.38                                                      |
| Frequency         |                                                             |
| Spectral Width    | 25510.2                                                     |
| Lowest Frequency  | -12754.9                                                    |
| Nucleus           | 11B                                                         |
| Acquired Size     | 32768                                                       |
| Spectral Size     | 65536                                                       |

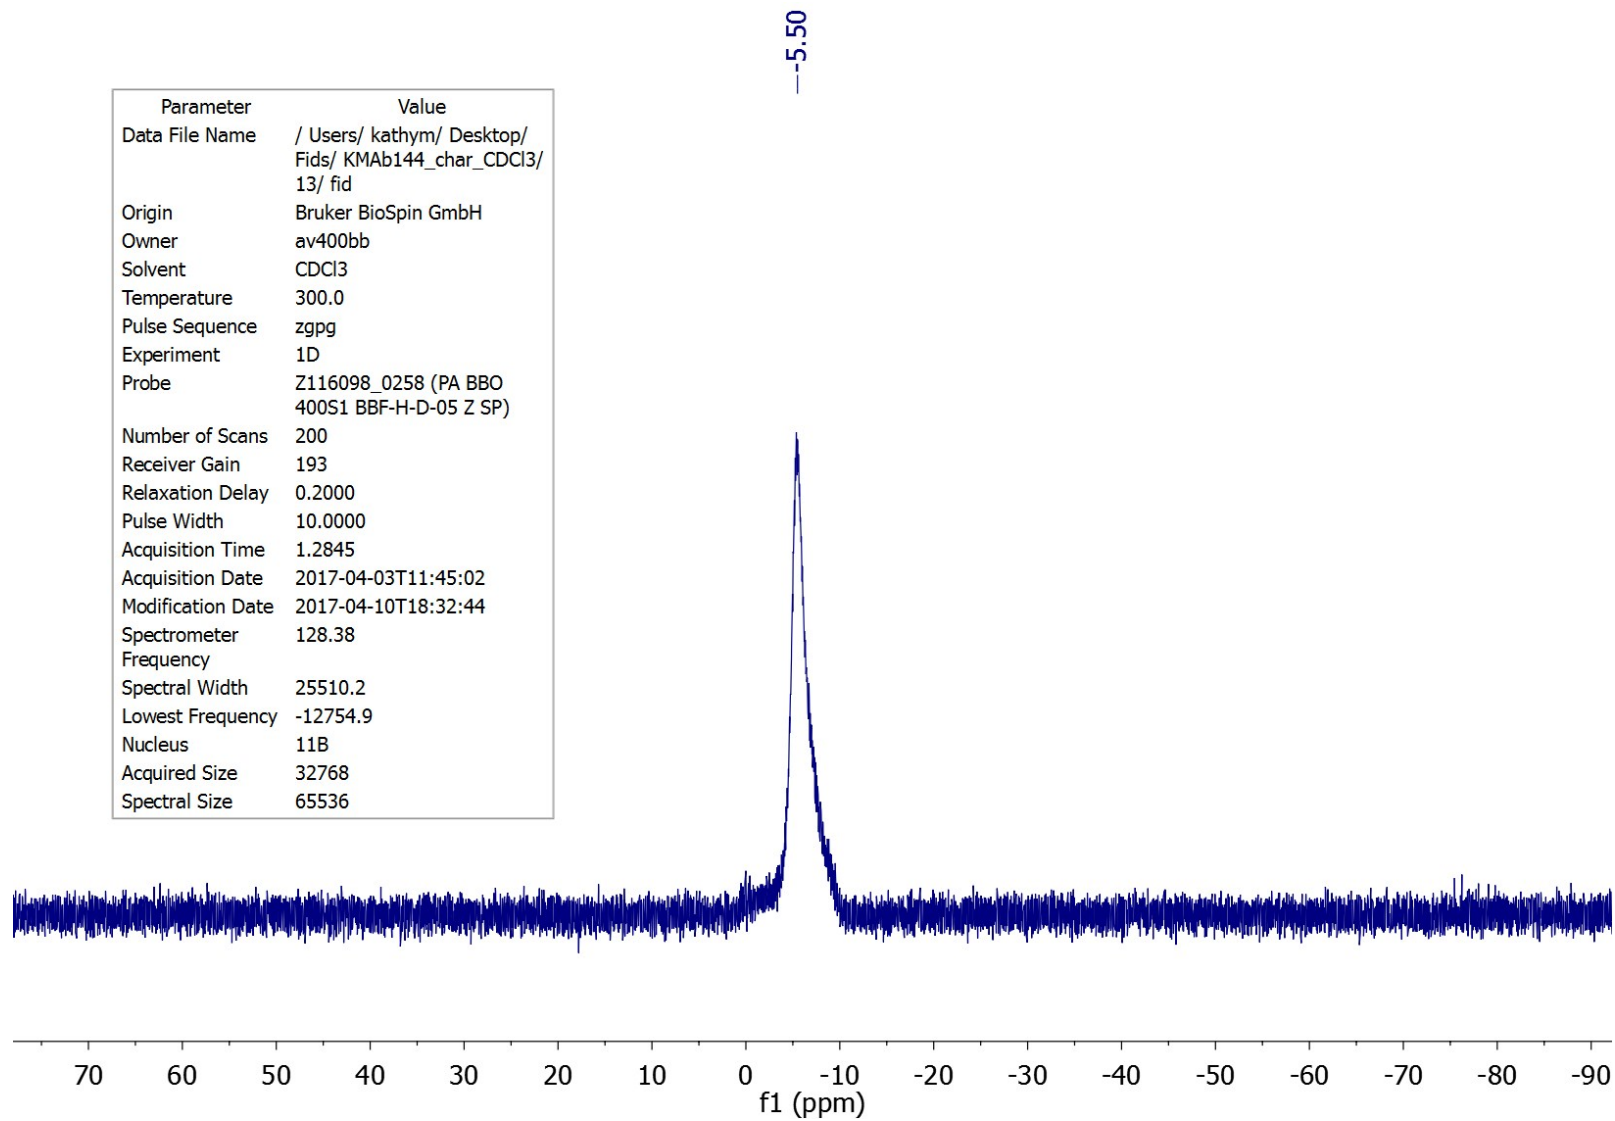

### $^{31}\text{P}\{^1\text{H}\}$ NMR Spectrum of 3c

| Parameter              | Value                                                                |
|------------------------|----------------------------------------------------------------------|
| Data File Name         | / Users/ kathym/<br>Desktop/ Fids/<br>KMAb144_char_CDCl3/<br>11/ fid |
| Origin                 | Bruker BioSpin GmbH                                                  |
| Owner                  | av400bb                                                              |
| Solvent                | CDCl3                                                                |
| Temperature            | 300.0                                                                |
| Pulse Sequence         | zgpg30                                                               |
| Experiment             | 1D                                                                   |
| Probe                  | Z116098_0258 (PA BBO<br>400S1 BBF-H-D-05 Z SP)                       |
| Number of Scans        | 128                                                                  |
| Receiver Gain          | 193                                                                  |
| Relaxation Delay       | 2.0000                                                               |
| Pulse Width            | 8.0000                                                               |
| Acquisition Time       | 0.5112                                                               |
| Acquisition Date       | 2017-04-03T11:32:18                                                  |
| Modification Date      | 2017-04-10T18:32:44                                                  |
| Spectrometer Frequency | 161.97                                                               |
| Spectral Width         | 64102.6                                                              |
| Lowest Frequency       | -40150.1                                                             |
| Nucleus                | $^{31}\text{P}$                                                      |
| Acquired Size          | 32768                                                                |
| Spectral Size          | 65536                                                                |

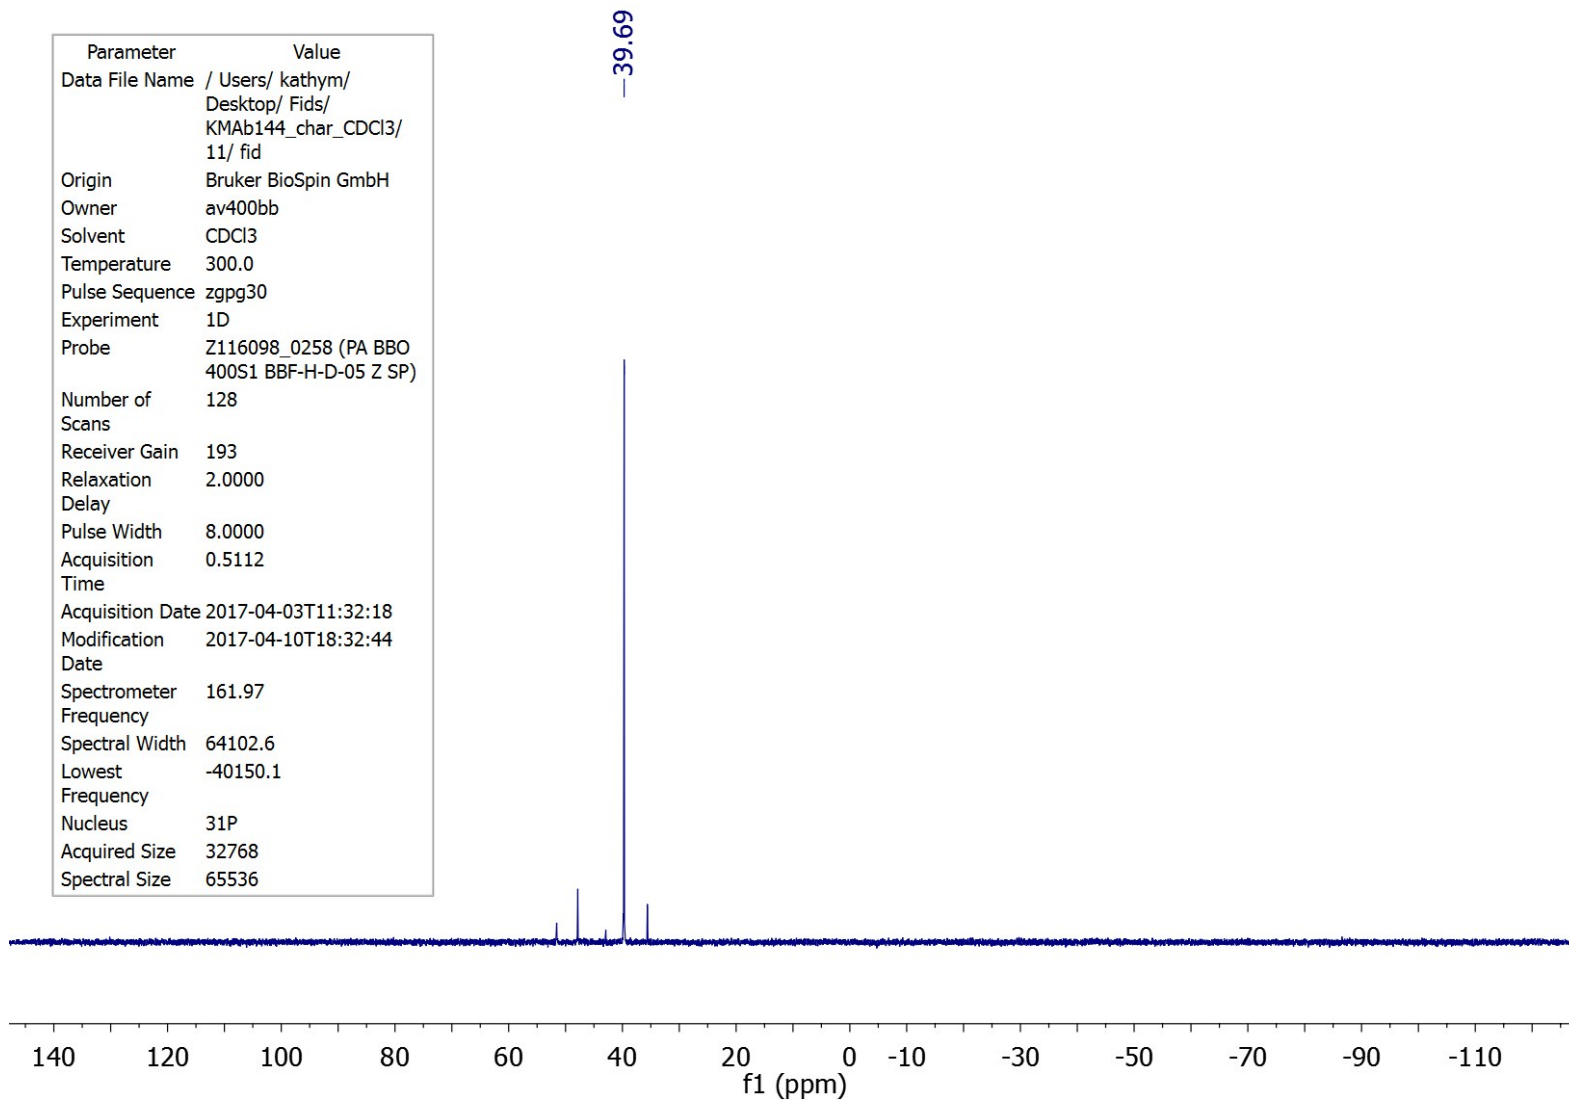

# $^{13}\text{C}\{^1\text{H}\}$ NMR Spectrum of 3c

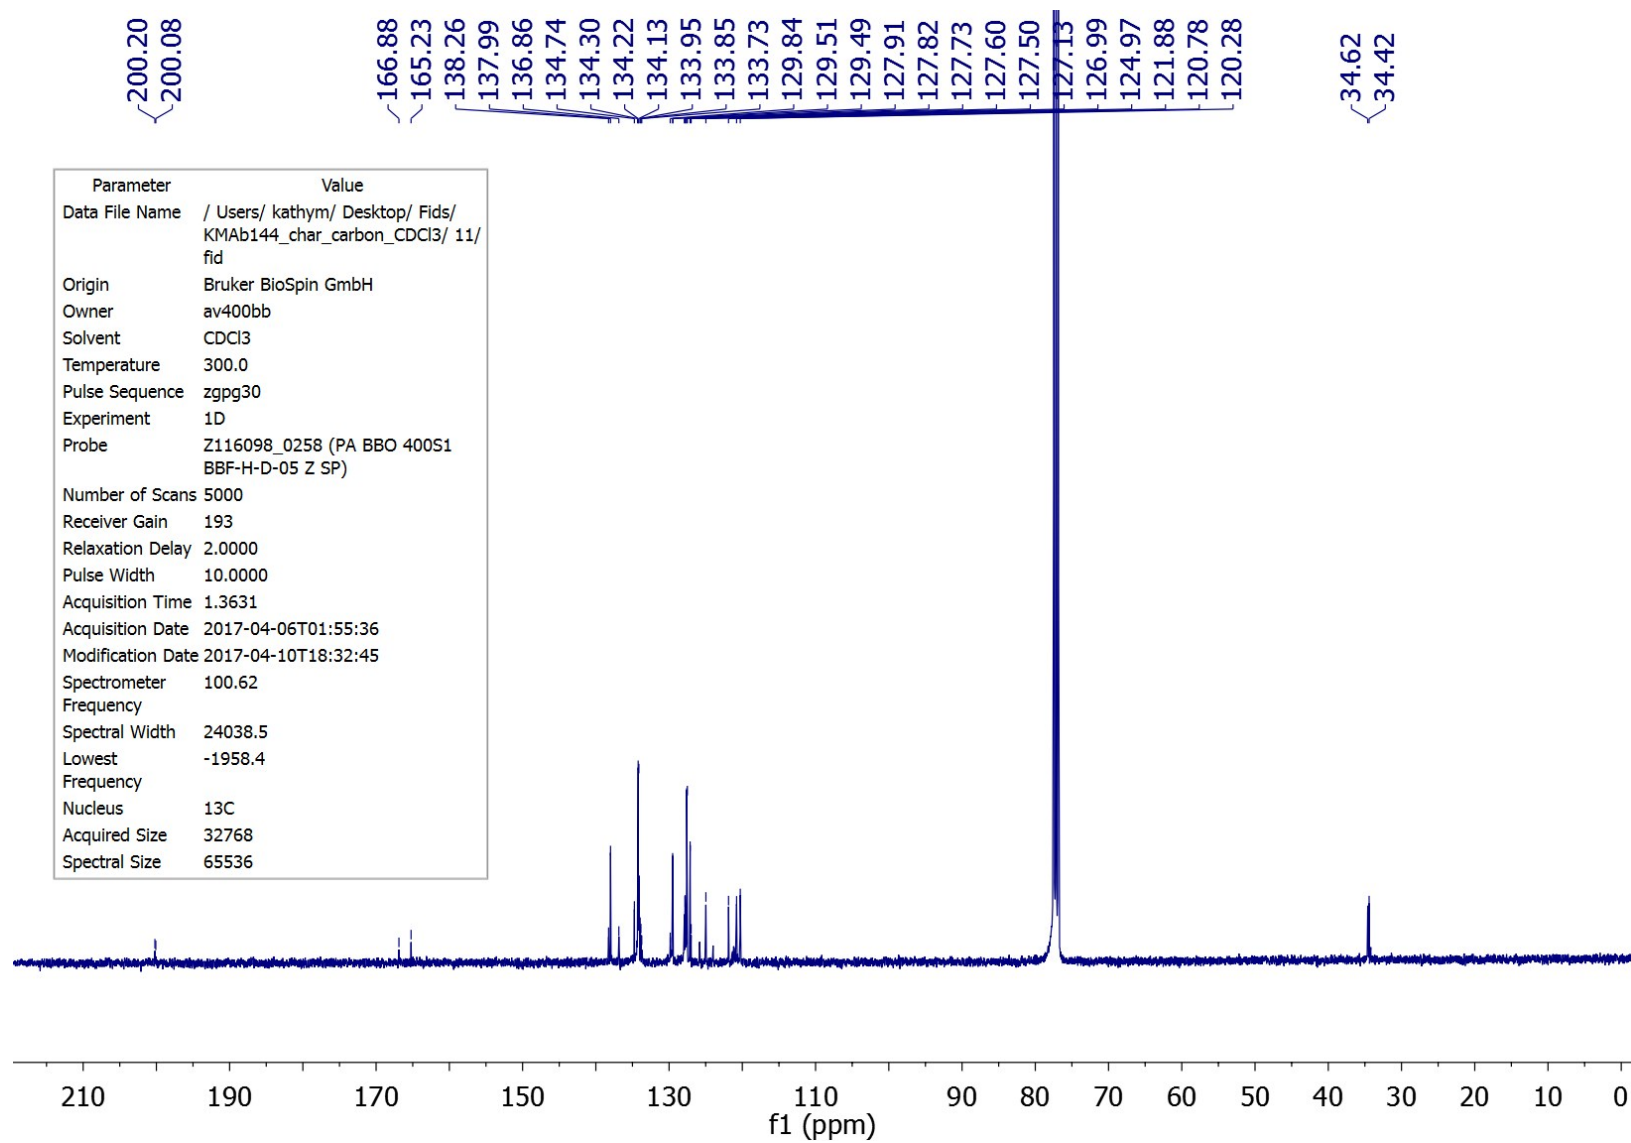

# $^{13}\text{C}\{^1\text{H}\}$ NMR Spectrum of 3c (Expansions)

| Parameter              | Value                                                              |
|------------------------|--------------------------------------------------------------------|
| Data File Name         | / Users/ kathym/ Desktop/ Fids/ KMAb144_char_carbon_CDCl3/ 11/ fid |
| Origin                 | Bruker BioSpin GmbH                                                |
| Owner                  | av400bb                                                            |
| Solvent                | CDCl3                                                              |
| Temperature            | 300.0                                                              |
| Pulse Sequence         | zgpg30                                                             |
| Experiment             | 1D                                                                 |
| Probe                  | Z116098_0258 (PA BBO 400S1 BBF-H-D-05 Z SP)                        |
| Number of Scans        | 5000                                                               |
| Receiver Gain          | 193                                                                |
| Relaxation Delay       | 2.0000                                                             |
| Pulse Width            | 10.0000                                                            |
| Acquisition Time       | 1.3631                                                             |
| Acquisition Date       | 2017-04-06T01:55:36                                                |
| Modification Date      | 2017-04-10T18:32:45                                                |
| Spectrometer Frequency | 100.62                                                             |
| Spectral Width         | 24038.5                                                            |
| Lowest Frequency       | -1958.4                                                            |
| Nucleus                | $^{13}\text{C}$                                                    |
| Acquired Size          | 32768                                                              |
| Spectral Size          | 65536                                                              |

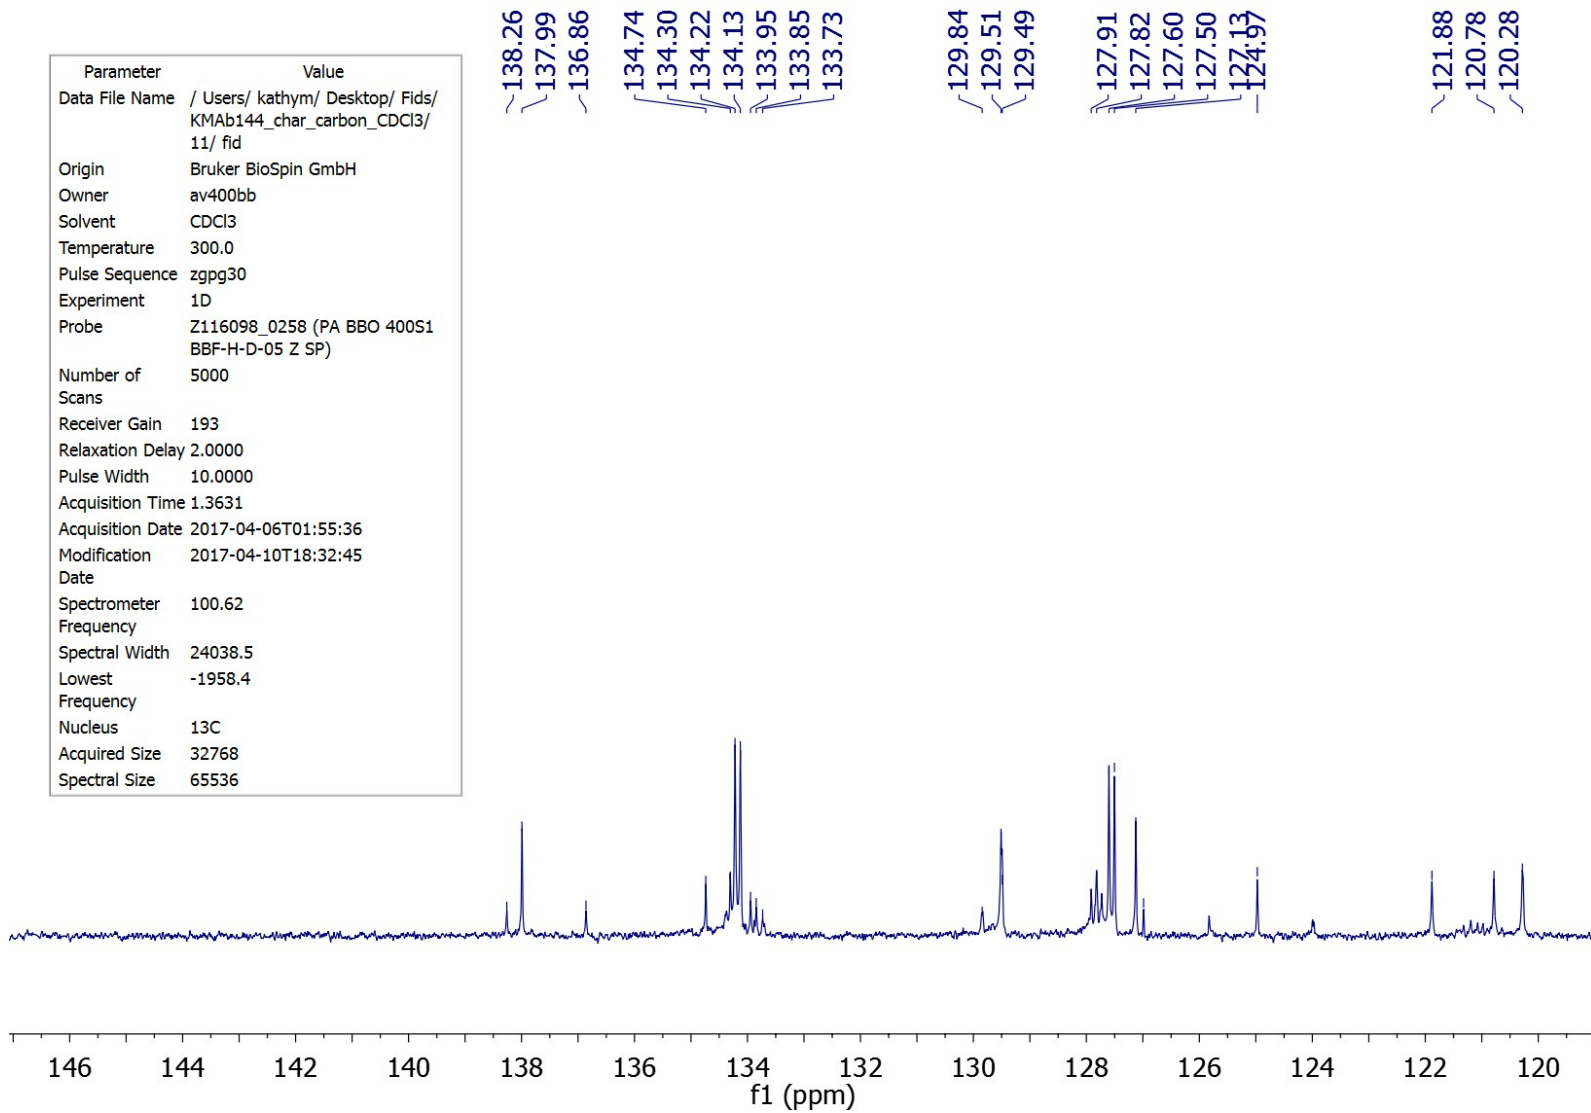

| Parameter              | Value                                                              |
|------------------------|--------------------------------------------------------------------|
| Data File Name         | / Users/ kathym/ Desktop/ Fids/ KMAb144_char_carbon_CDCl3/ 11/ fid |
| Origin                 | Bruker BioSpin GmbH                                                |
| Owner                  | av400bb                                                            |
| Solvent                | CDCl3                                                              |
| Temperature            | 300.0                                                              |
| Pulse Sequence         | zgpg30                                                             |
| Experiment             | 1D                                                                 |
| Probe                  | Z116098_0258 (PA BBO 400S1 BBF-H-D-05 Z SP)                        |
| Number of Scans        | 5000                                                               |
| Receiver Gain          | 193                                                                |
| Relaxation Delay       | 2.0000                                                             |
| Pulse Width            | 10.0000                                                            |
| Acquisition Time       | 1.3631                                                             |
| Acquisition Date       | 2017-04-06T01:55:36                                                |
| Modification Date      | 2017-04-10T18:32:45                                                |
| Spectrometer Frequency | 100.62                                                             |
| Spectral Width         | 24038.5                                                            |
| Lowest Frequency       | -1958.4                                                            |
| Nucleus                | 13C                                                                |
| Acquired Size          | 32768                                                              |
| Spectral Size          | 65536                                                              |

200.20  
200.08

166.88  
165.23

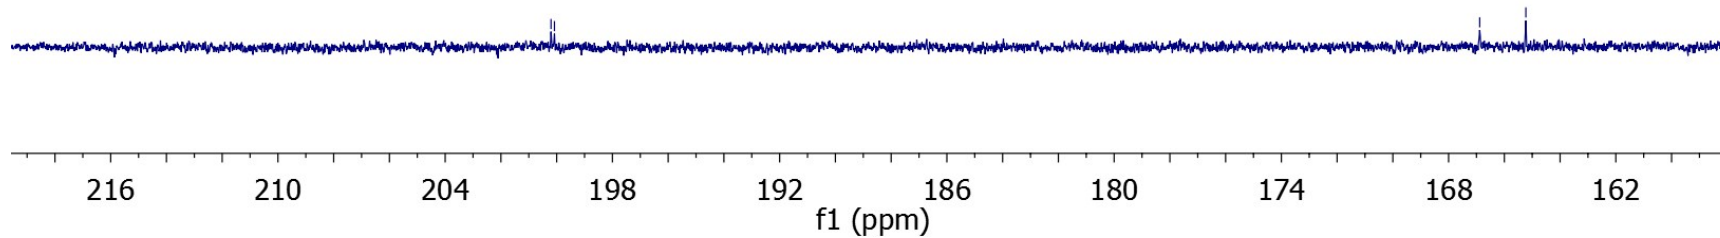

| Parameter         | Value                                                              |
|-------------------|--------------------------------------------------------------------|
| Data File Name    | / Users/ kathym/ Desktop/ Fids/ KMAb144_char_carbon_CDCl3/ 11/ fid |
| Origin            | Bruker BioSpin GmbH                                                |
| Owner             | av400bb                                                            |
| Solvent           | CDCl3                                                              |
| Temperature       | 300.0                                                              |
| Pulse Sequence    | zgpg30                                                             |
| Experiment        | 1D                                                                 |
| Probe             | Z116098_0258 (PA BBO 400S1 BBF-H-D-05 Z SP)                        |
| Number of Scans   | 5000                                                               |
| Receiver Gain     | 193                                                                |
| Relaxation Delay  | 2.0000                                                             |
| Pulse Width       | 10.0000                                                            |
| Acquisition Time  | 1.3631                                                             |
| Acquisition Date  | 2017-04-06T01:55:36                                                |
| Modification Date | 2017-04-10T18:32:45                                                |
| Spectrometer      | 100.62                                                             |
| Frequency         |                                                                    |
| Spectral Width    | 24038.5                                                            |
| Lowest            | -1958.4                                                            |
| Frequency         |                                                                    |
| Nucleus           | 13C                                                                |
| Acquired Size     | 32768                                                              |
| Spectral Size     | 65536                                                              |

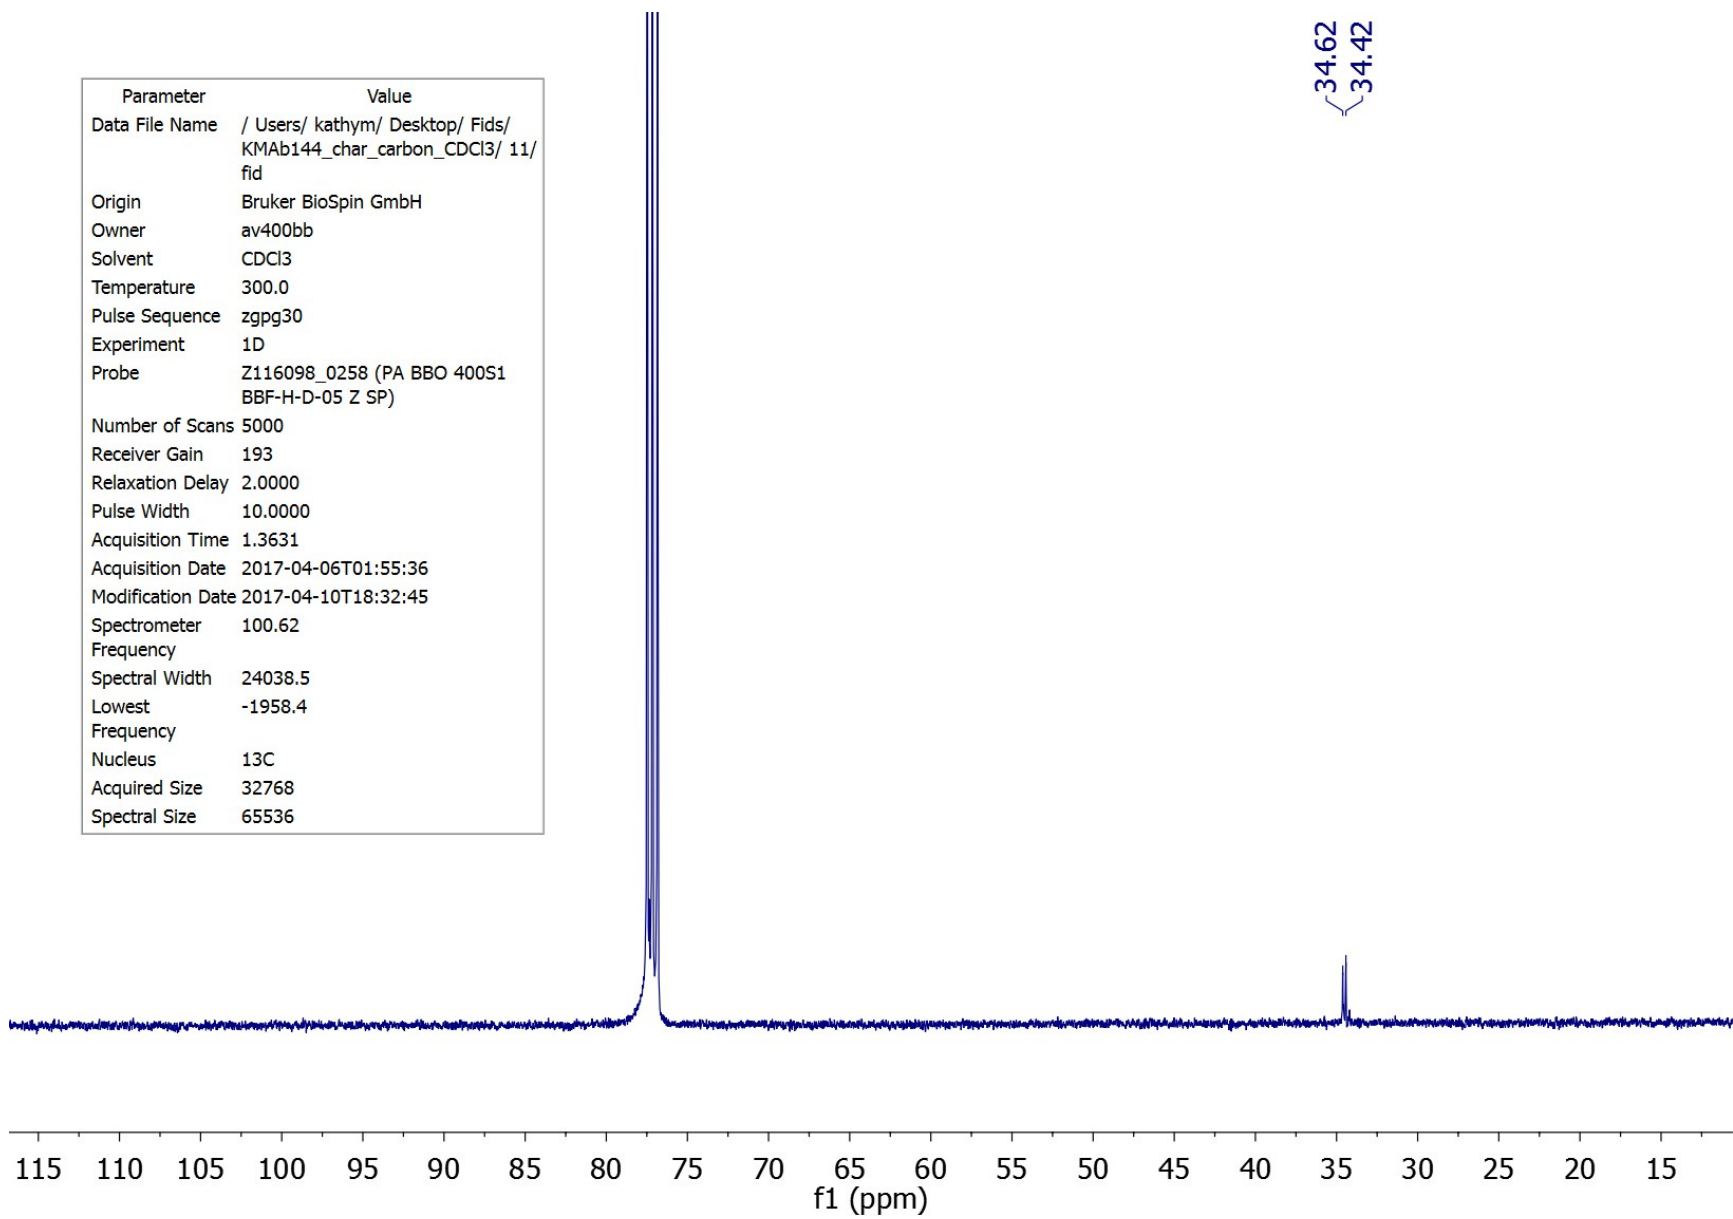

## Characterisation of $[\text{Ru}(\text{BCat})(\text{CO})(\text{PPh}_3)_2\{\text{H}_2\text{B}(\text{mt})_2\}]$ (**3e**)

### Commentary

The formulation of **3e** follows from spectroscopic data akin to those for **3a-c** in addition to the appearance of two resonances in the  $^{11}\text{B}$  NMR spectrum. The resonance at  $\delta_{11\text{B}} = -5.44$  corresponds to the  $\text{BH}_2$  group (*cf.*  $\delta_{11\text{B}} = -5.5$  for **3a**) whilst that at  $\delta_{11\text{B}} = 52.3$  corresponds to the trigonal boron of the BCat ligand. The  $^{31}\text{P}\{^1\text{H}\}$  NMR spectrum comprises a single *sharp* resonance ( $\delta_{\text{P}} = 47.2$ ) confirming that the boryl and phosphine ligands are mutually *cis*.



**<sup>1</sup>H NMR Spectrum of 3e**

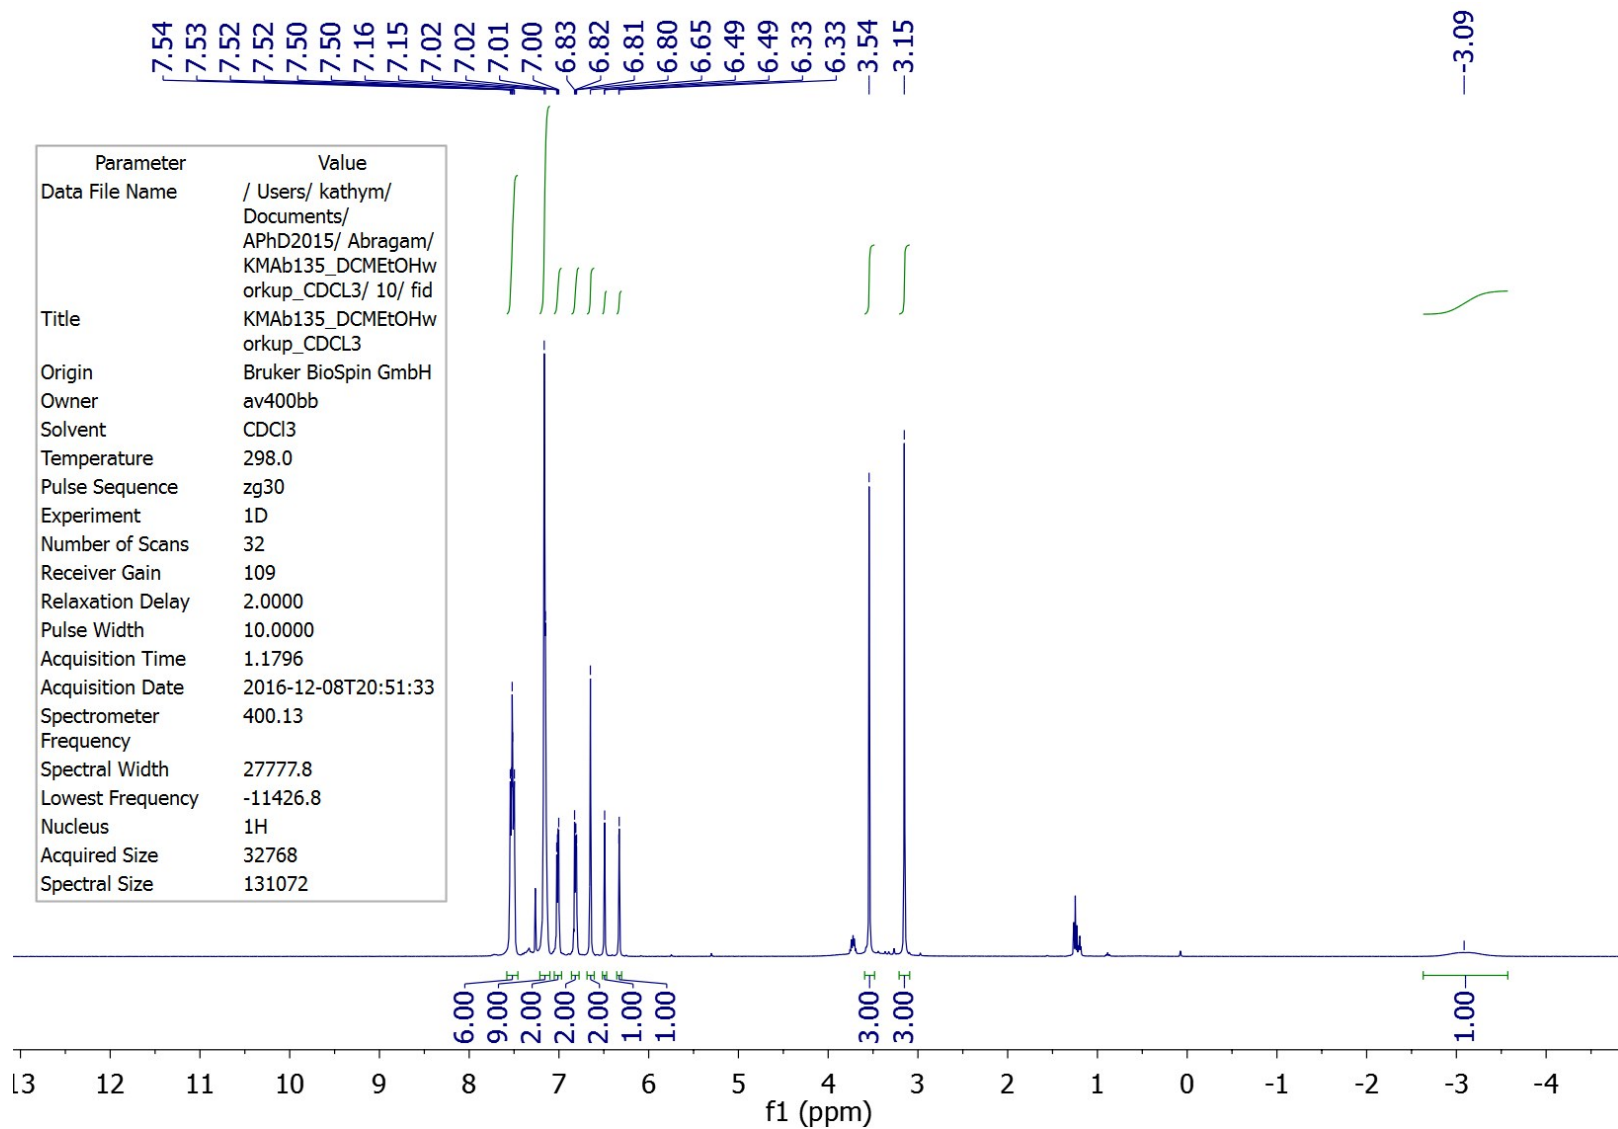

**$^{11}\text{B}\{^1\text{H}\}$  NMR Spectrum of 3e**

| Parameter        | Value                                                                                                  |
|------------------|--------------------------------------------------------------------------------------------------------|
| Data File Name   | / Users/ kathym/<br>Documents/<br>APhD2015/<br>Abragam/<br>KMAb135_DCMetO<br>Hworkup_CDCL3/<br>18/ fid |
| Title            | KMAb135_DCMetO<br>Hworkup_CDCL3                                                                        |
| Origin           | Bruker BioSpin<br>GmbH                                                                                 |
| Owner            | av400bb                                                                                                |
| Solvent          | CDCl3                                                                                                  |
| Temperature      | 300.0                                                                                                  |
| Pulse Sequence   | zgpg                                                                                                   |
| Experiment       | 1D                                                                                                     |
| Number of Scans  | 200                                                                                                    |
| Receiver Gain    | 193                                                                                                    |
| Relaxation Delay | 0.2000                                                                                                 |
| Pulse Width      | 10.0000                                                                                                |
| Acquisition Time | 1.2845                                                                                                 |
| Acquisition Date | 2016-12-09T12:35:<br>27                                                                                |
| Spectrometer     | 128.38                                                                                                 |
| Frequency        |                                                                                                        |
| Spectral Width   | 25510.2                                                                                                |
| Lowest Frequency | -12754.9                                                                                               |
| Nucleus          | $^{11}\text{B}$                                                                                        |
| Acquired Size    | 32768                                                                                                  |
| Spectral Size    | 65536                                                                                                  |

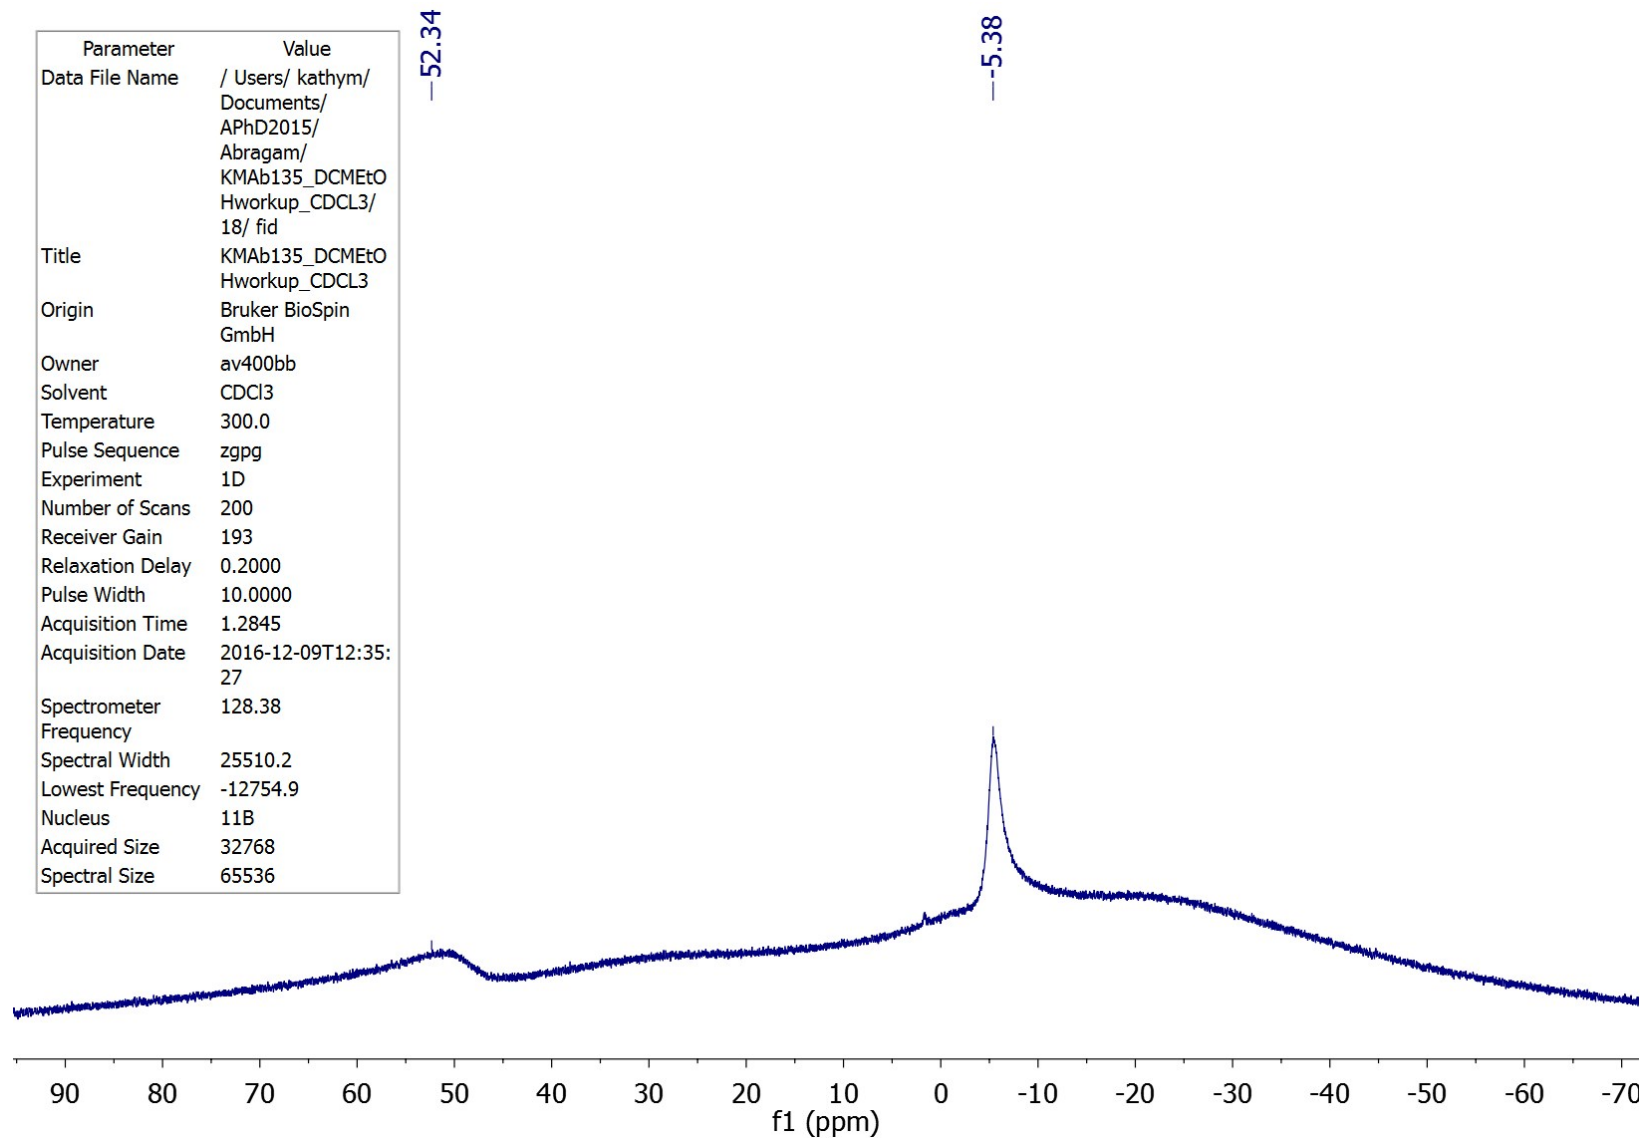

### $^{31}\text{P}\{^1\text{H}\}$ NMR Spectrum of 3e

| Parameter        | Value                                                                                            |
|------------------|--------------------------------------------------------------------------------------------------|
| Data File Name   | / Users/ kathym/<br>Documents/ APhD2015/<br>Abragam/<br>KMAb135_DCMetOHwor<br>kup_CDCL3/ 11/ fid |
| Title            | KMAb135_DCMetOHwor<br>kup_CDCL3                                                                  |
| Origin           | Bruker BioSpin GmbH                                                                              |
| Owner            | av400bb                                                                                          |
| Solvent          | CDCl3                                                                                            |
| Temperature      | 300.0                                                                                            |
| Pulse Sequence   | zgpg30                                                                                           |
| Experiment       | 1D                                                                                               |
| Number of Scans  | 64                                                                                               |
| Receiver Gain    | 193                                                                                              |
| Relaxation Delay | 2.0000                                                                                           |
| Pulse Width      | 8.0000                                                                                           |
| Acquisition Time | 0.5112                                                                                           |
| Acquisition Date | 2016-12-08T20:58:06                                                                              |
| Spectrometer     | 161.97                                                                                           |
| Frequency        |                                                                                                  |
| Spectral Width   | 64102.6                                                                                          |
| Lowest Frequency | -40150.1                                                                                         |
| Nucleus          | $^{31}\text{P}$                                                                                  |
| Acquired Size    | 32768                                                                                            |
| Spectral Size    | 65536                                                                                            |

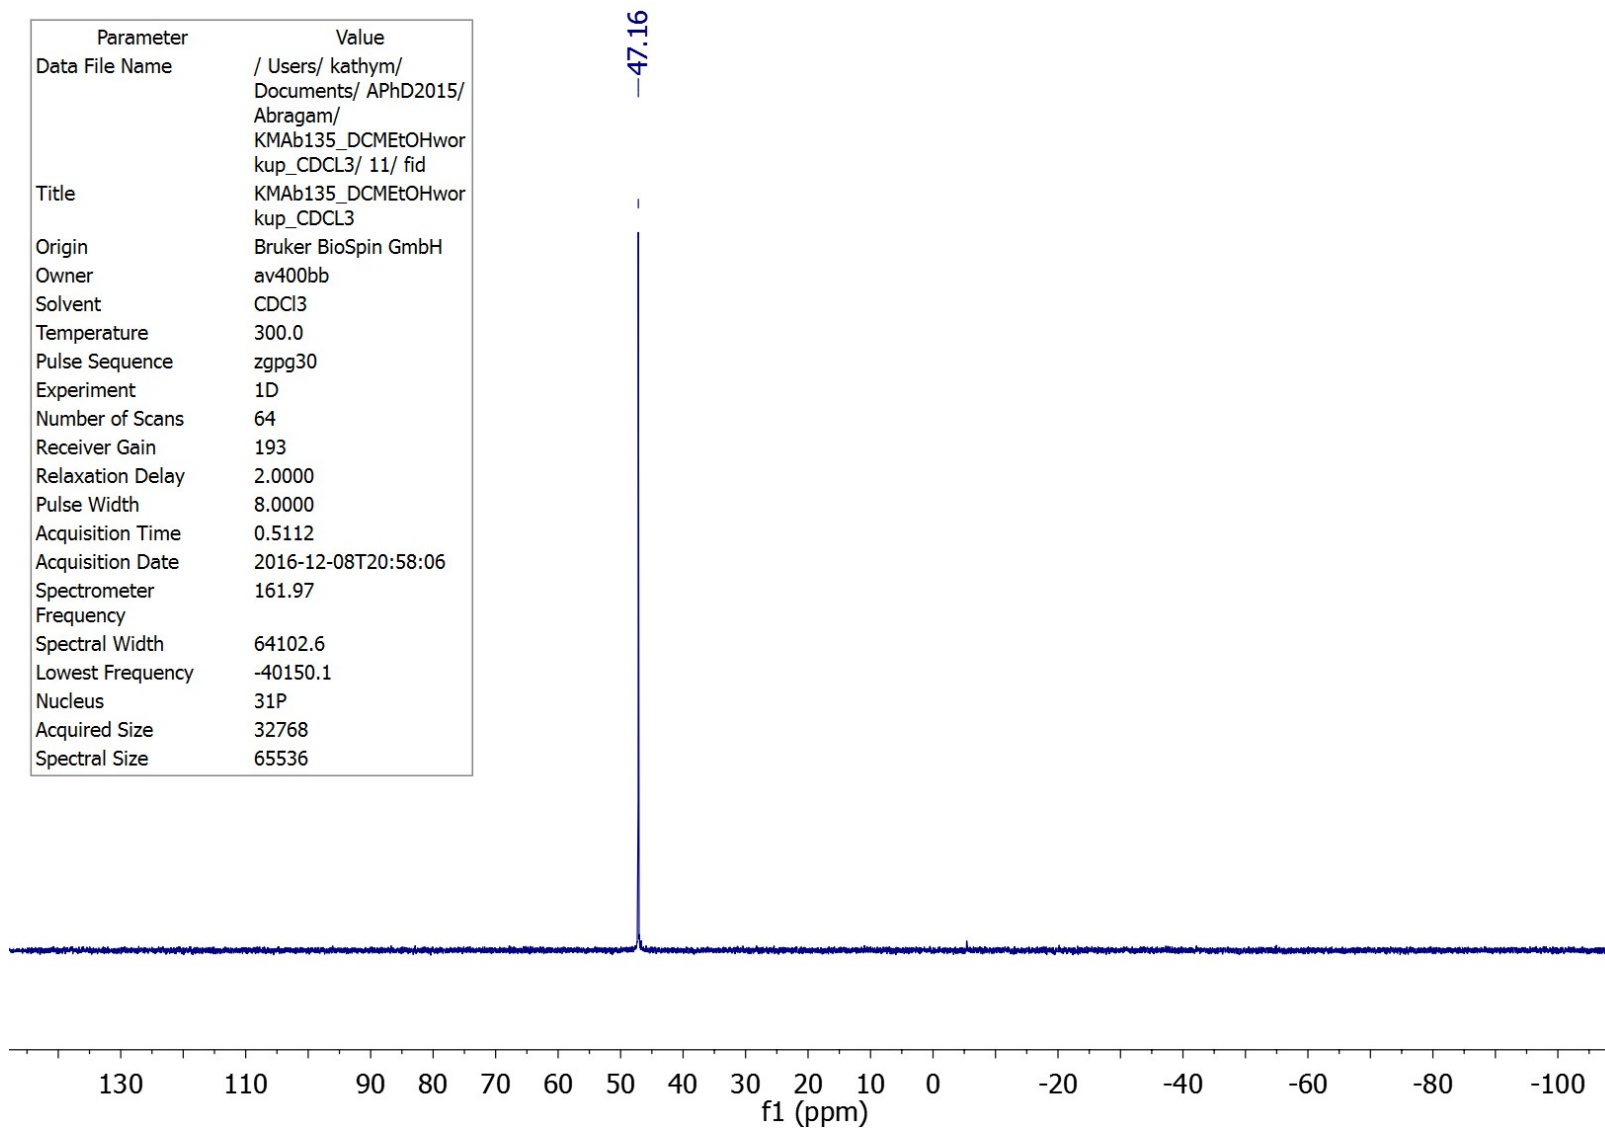

# HSQC <sup>13</sup>C-<sup>1</sup>H NMR Spectrum of 3e

| Parameter        | Value (f2, f1)                                                                                         |
|------------------|--------------------------------------------------------------------------------------------------------|
| Data File Name   | / Users/ kathym/<br>Documents/<br>APhD2015/<br>Abragam/<br>KMAb135_DCMetOH<br>workup_CDCL3/ 14/<br>ser |
| Title            | KMAb135_DCMetOH<br>workup_CDCL3                                                                        |
| Origin           | Bruker BioSpin<br>GmbH                                                                                 |
| Owner            | av400bb                                                                                                |
| Solvent          | CDCl3                                                                                                  |
| Temperature      | 300.0                                                                                                  |
| Pulse Sequence   | hsqcetdgpsisp2.3                                                                                       |
| Experiment       | 2D-HSQC-EDITED                                                                                         |
| Number of Scans  | 4                                                                                                      |
| Receiver Gain    | 193                                                                                                    |
| Relaxation Delay | 1.0000                                                                                                 |
| Pulse Width      | 10.0000                                                                                                |
| Acquisition Time | 0.2135                                                                                                 |
| Acquisition Date | 2016-12-09T03:00:<br>46                                                                                |
| Spectrometer     | (400.13, 100.62)                                                                                       |
| Frequency        |                                                                                                        |
| Spectral Width   | (4795.4, 16611.3)                                                                                      |
| Lowest Frequency | (-526.3, -1245.9)                                                                                      |
| Nucleus          | ( <sup>1</sup> H, <sup>13</sup> C)                                                                     |
| Acquired Size    | (1024, 256)                                                                                            |
| Spectral Size    | (1024, 1024)                                                                                           |

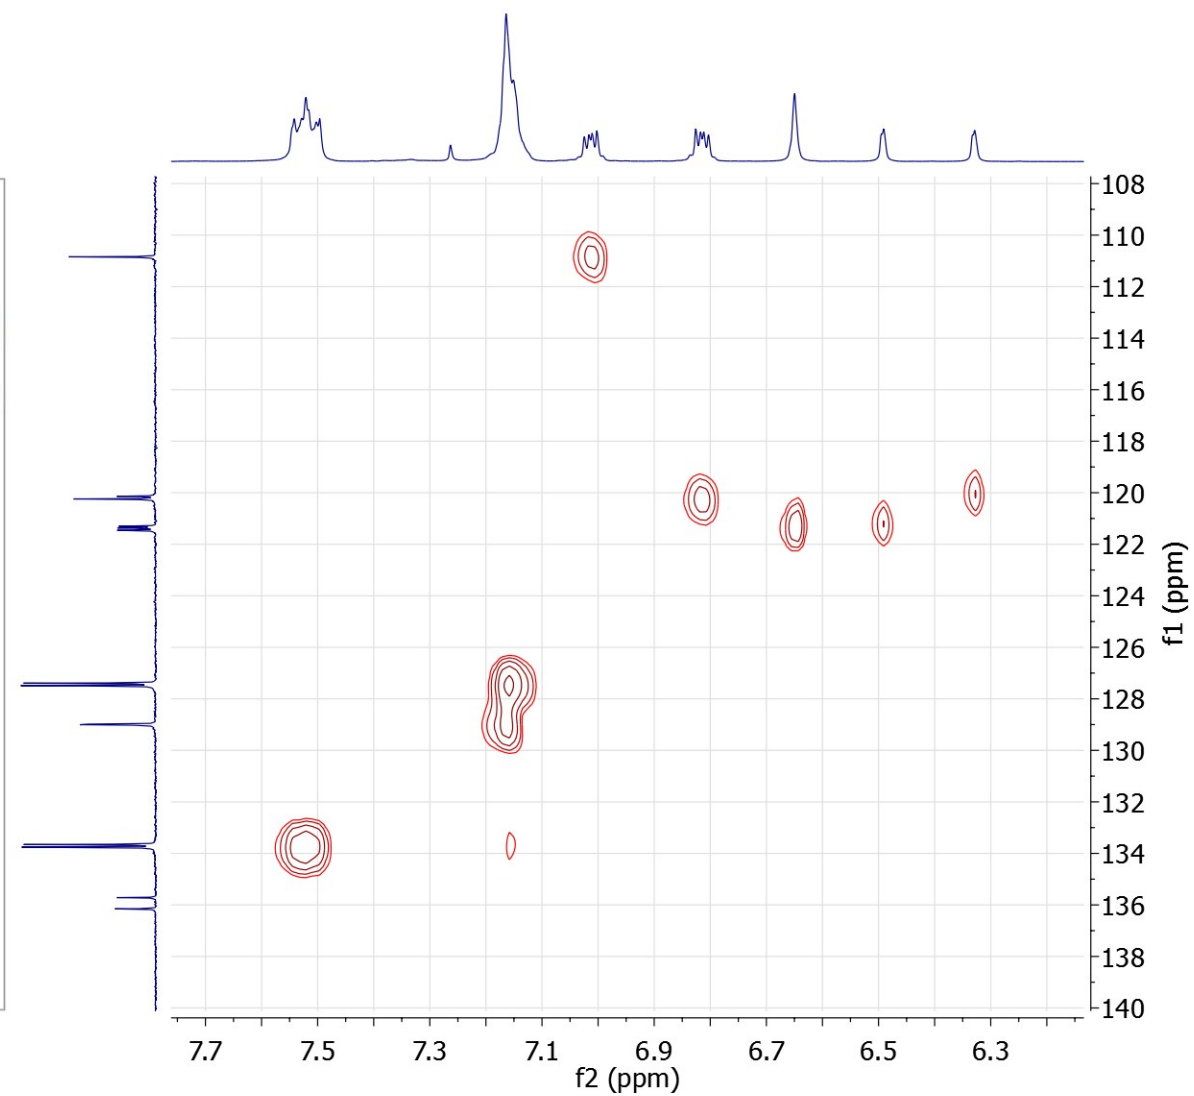

# $^{13}\text{C}\{^1\text{H}\}$ NMR Spectrum of 3e

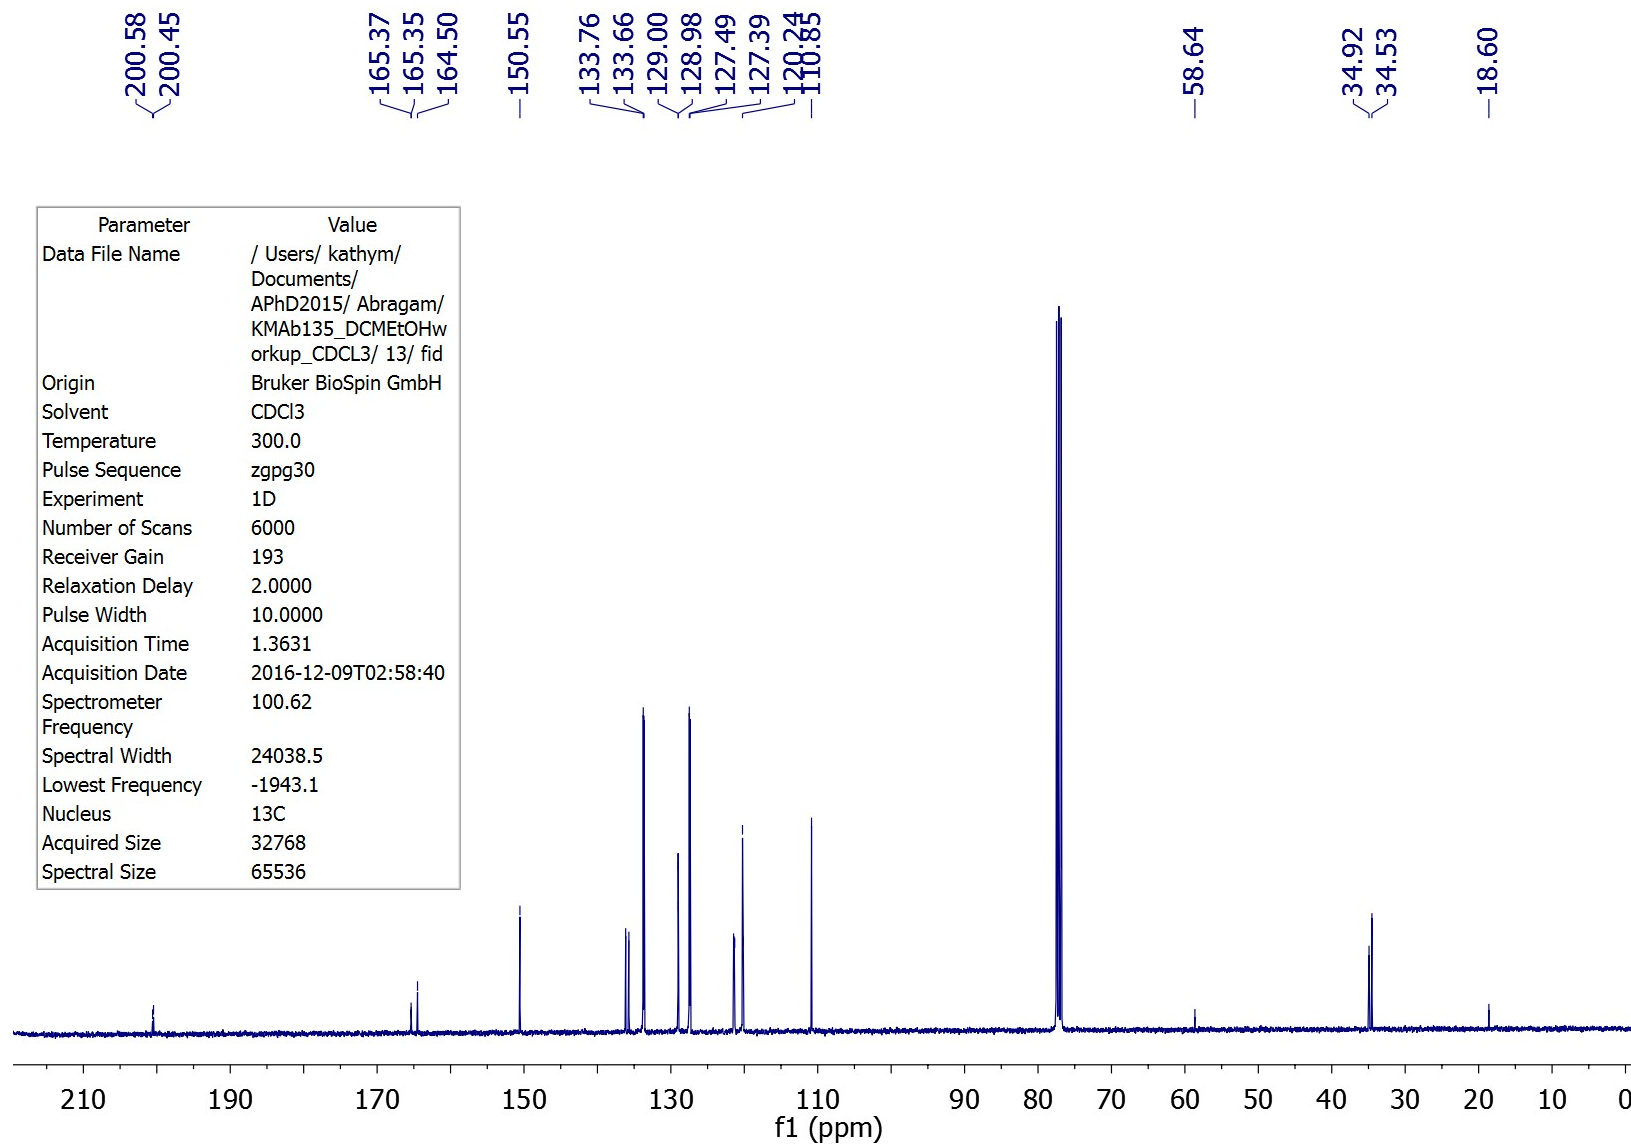

### <sup>13</sup>C{<sup>1</sup>H} NMR Spectrum of 3e (Expansion)

| Parameter        | Value                                                                                               |
|------------------|-----------------------------------------------------------------------------------------------------|
| Data File Name   | / Users/ kathym/<br>Documents/<br>APhD2015/ Abragam/<br>KMAb135_DCMEtOH<br>workup_CDCL3/ 13/<br>fid |
| Origin           | Bruker BioSpin GmbH                                                                                 |
| Owner            | av400bb                                                                                             |
| Solvent          | CDCl3                                                                                               |
| Temperature      | 300.0                                                                                               |
| Pulse Sequence   | zgpg30                                                                                              |
| Experiment       | 1D                                                                                                  |
| Number of Scans  | 6000                                                                                                |
| Receiver Gain    | 193                                                                                                 |
| Relaxation Delay | 2.0000                                                                                              |
| Pulse Width      | 10.0000                                                                                             |
| Acquisition Time | 1.3631                                                                                              |
| Acquisition Date | 2016-12-09T02:58:40                                                                                 |
| Spectrometer     | 100.62                                                                                              |
| Frequency        |                                                                                                     |
| Spectral Width   | 24038.5                                                                                             |
| Lowest Frequency | -1943.1                                                                                             |
| Nucleus          | 13C                                                                                                 |
| Acquired Size    | 32768                                                                                               |
| Spectral Size    | 65536                                                                                               |

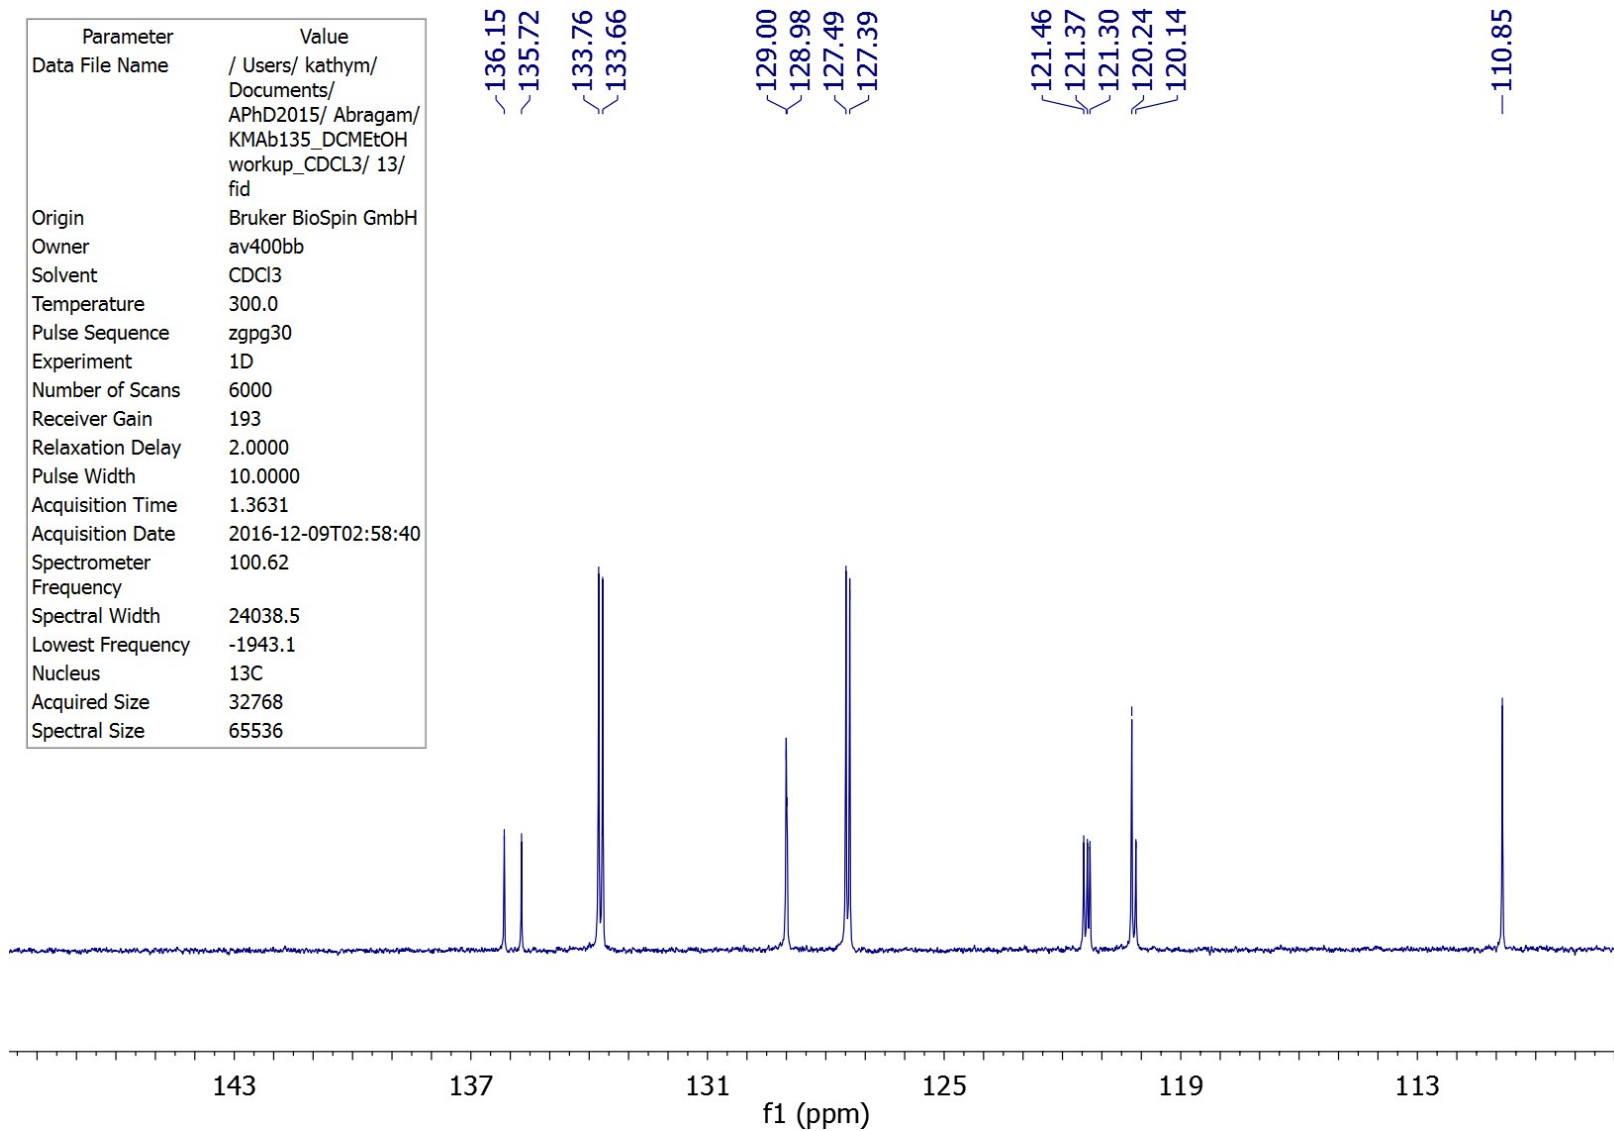

## Characterisation of $[\text{Ru}(\text{SiCl}_3)(\text{CO})(\text{PPh}_3)\{\text{H}_2\text{B}(\text{mt})_2\}]$ (**3f**)

### Commentary

The infrared spectrum of **3f** included weak absorptions at 2430 and 2046  $\text{cm}^{-1}$  consistent with  $\kappa^3\text{-H,S,S'}$  coordination of the borate which was further supported by a broad resonance at  $-5.74$  ppm in the  $^1\text{H}$  NMR spectrum.

# <sup>1</sup>H NMR Spectrum of 3f

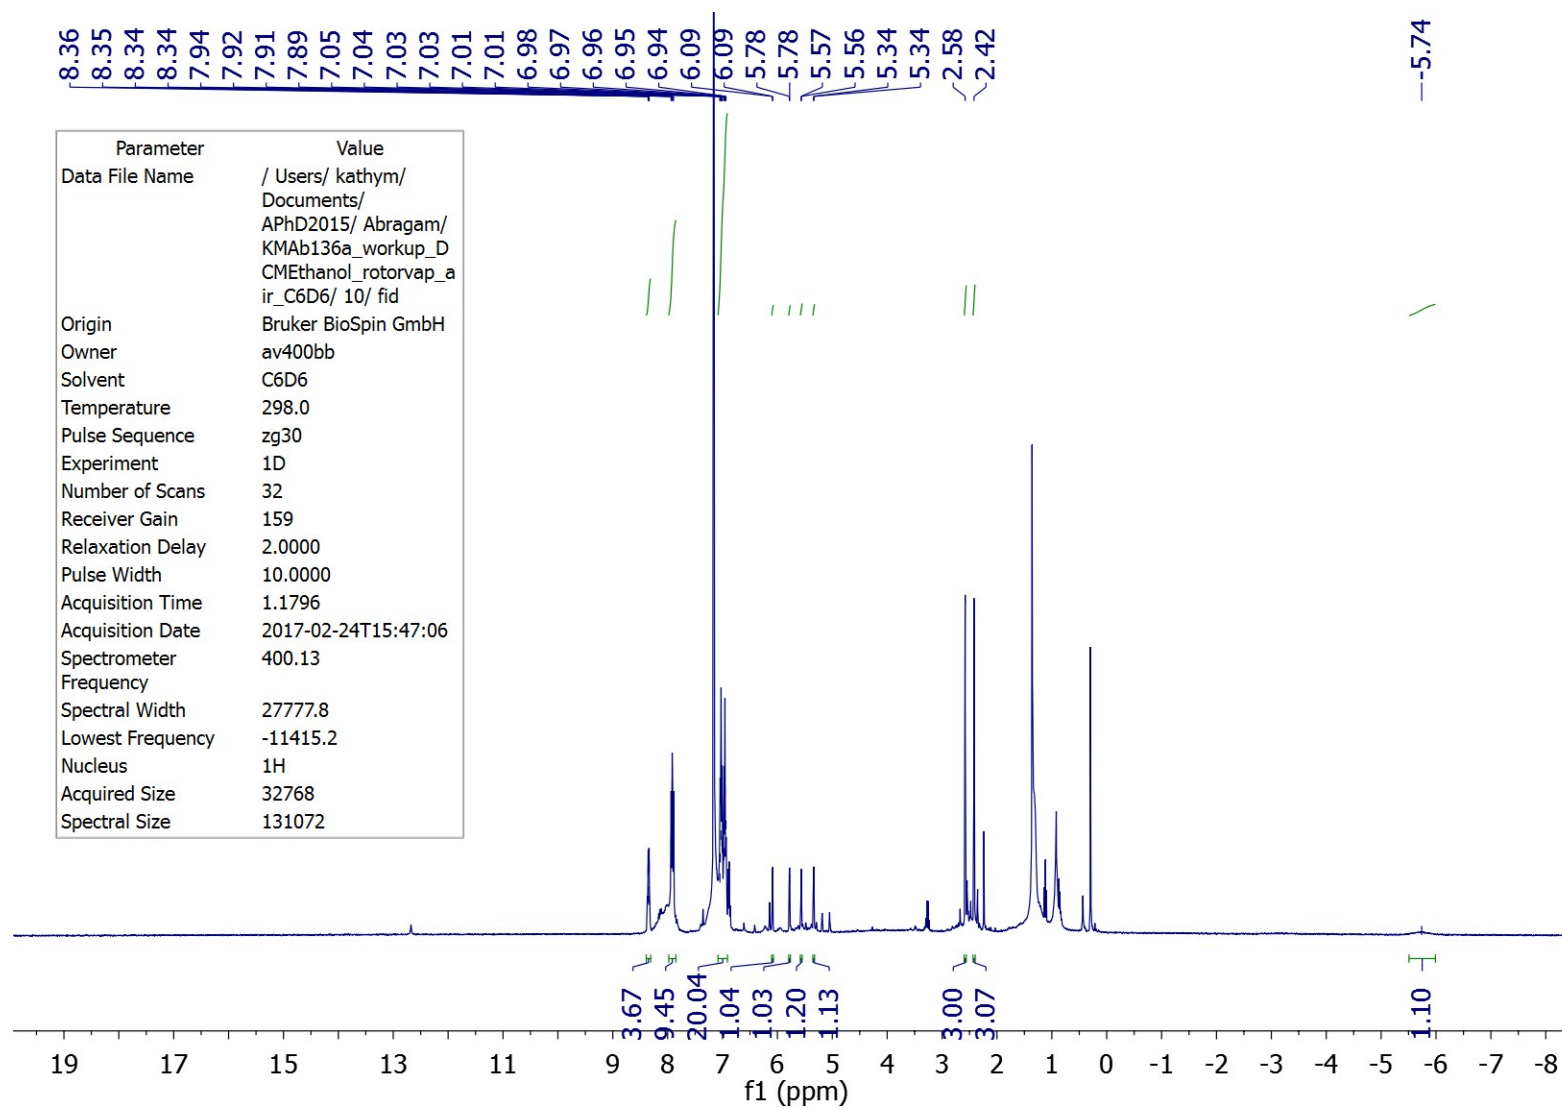

| Parameter        | Value                                                                                                  |
|------------------|--------------------------------------------------------------------------------------------------------|
| Data File Name   | / Users/ kathym/ Documents/ APhD2015/ Abragam/ KMAb136a_workup_D CMEthanol_rotorvap_a ir_C6D6/ 10/ fid |
| Origin           | Bruker BioSpin GmbH                                                                                    |
| Owner            | av400bb                                                                                                |
| Solvent          | C6D6                                                                                                   |
| Temperature      | 298.0                                                                                                  |
| Pulse Sequence   | zg30                                                                                                   |
| Experiment       | 1D                                                                                                     |
| Number of Scans  | 32                                                                                                     |
| Receiver Gain    | 159                                                                                                    |
| Relaxation Delay | 2.0000                                                                                                 |
| Pulse Width      | 10.0000                                                                                                |
| Acquisition Time | 1.1796                                                                                                 |
| Acquisition Date | 2017-02-24T15:47:06                                                                                    |
| Spectrometer     | 400.13                                                                                                 |
| Frequency        |                                                                                                        |
| Spectral Width   | 27777.8                                                                                                |
| Lowest Frequency | -11415.2                                                                                               |
| Nucleus          | 1H                                                                                                     |
| Acquired Size    | 32768                                                                                                  |
| Spectral Size    | 131072                                                                                                 |



# <sup>1</sup>H NMR Spectrum of 3f (Expansion)

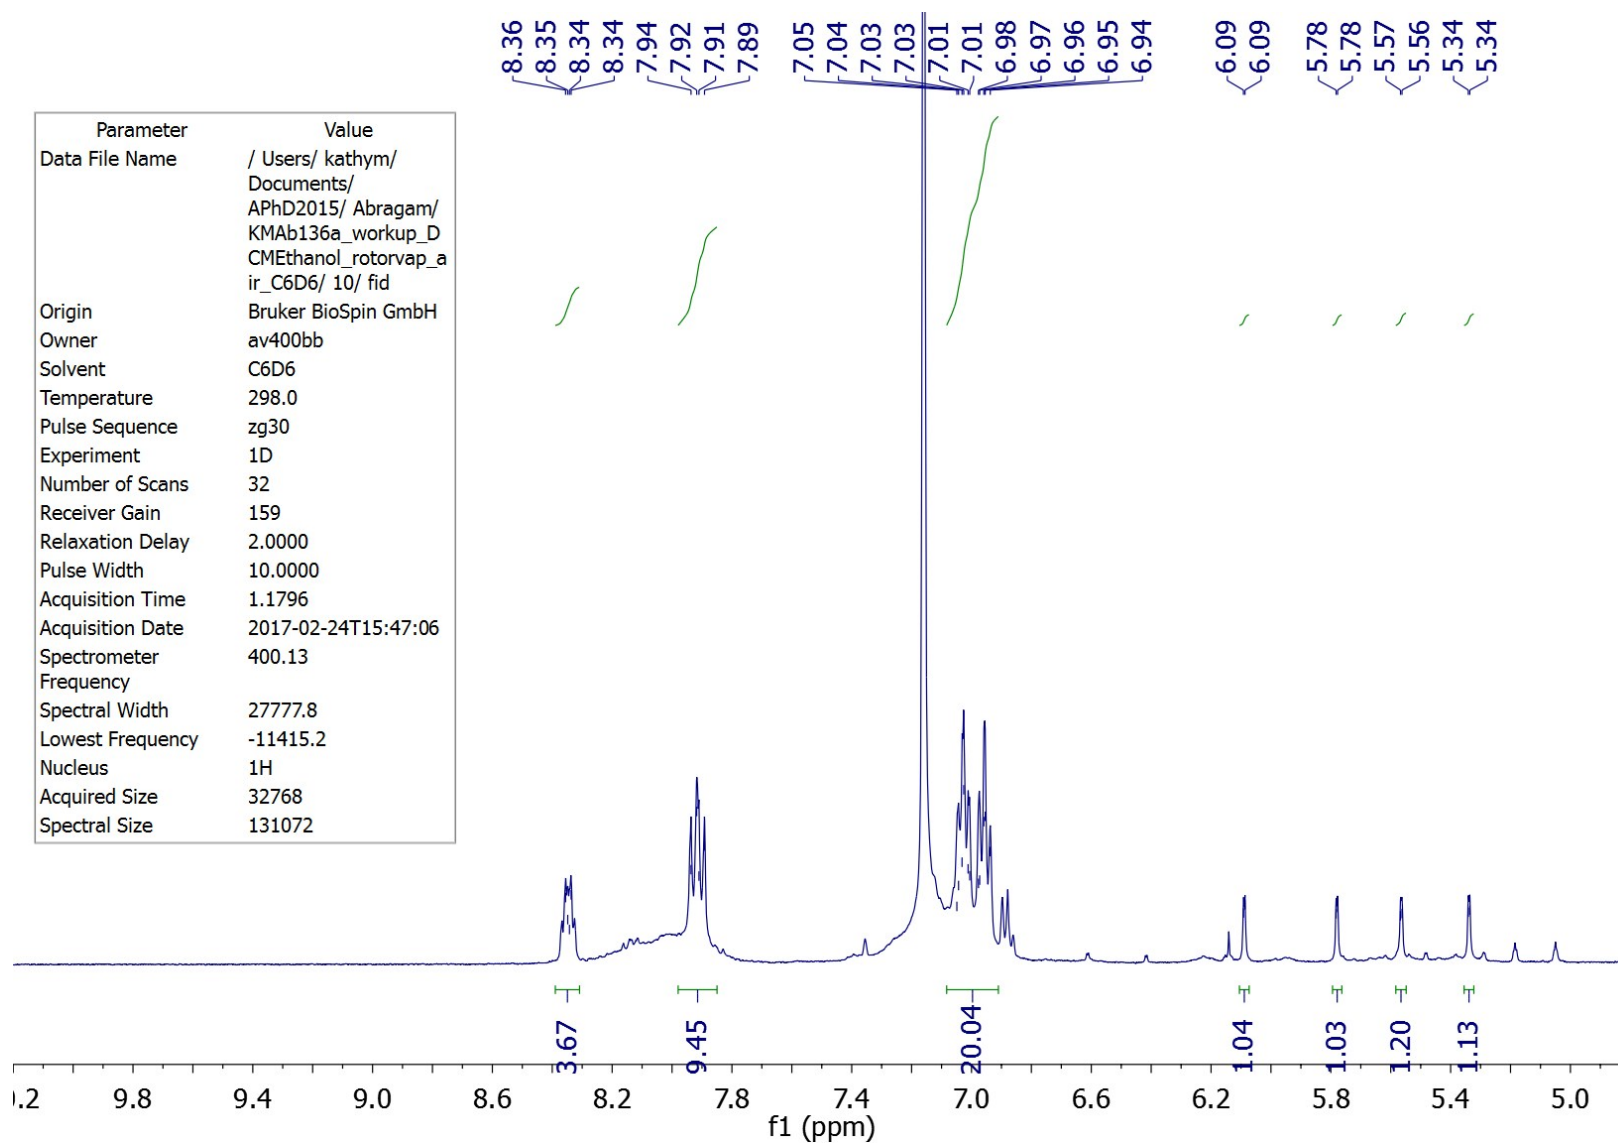

| Parameter        | Value                                                                                                                 |
|------------------|-----------------------------------------------------------------------------------------------------------------------|
| Data File Name   | / Users/ kathym/<br>Documents/<br>APhD2015/ Abragam/<br>KMAb136a_workup_D<br>CMethanol_rotorvap_a<br>ir_C6D6/ 10/ fid |
| Origin           | Bruker BioSpin GmbH                                                                                                   |
| Owner            | av400bb                                                                                                               |
| Solvent          | C6D6                                                                                                                  |
| Temperature      | 298.0                                                                                                                 |
| Pulse Sequence   | zg30                                                                                                                  |
| Experiment       | 1D                                                                                                                    |
| Number of Scans  | 32                                                                                                                    |
| Receiver Gain    | 159                                                                                                                   |
| Relaxation Delay | 2.0000                                                                                                                |
| Pulse Width      | 10.0000                                                                                                               |
| Acquisition Time | 1.1796                                                                                                                |
| Acquisition Date | 2017-02-24T15:47:06                                                                                                   |
| Spectrometer     | 400.13                                                                                                                |
| Frequency        |                                                                                                                       |
| Spectral Width   | 27777.8                                                                                                               |
| Lowest Frequency | -11415.2                                                                                                              |
| Nucleus          | <sup>1</sup> H                                                                                                        |
| Acquired Size    | 32768                                                                                                                 |
| Spectral Size    | 131072                                                                                                                |

# $^{11}\text{B}\{^1\text{H}\}$ NMR Spectrum of 3f

| Parameter        | Value                                                                 |
|------------------|-----------------------------------------------------------------------|
| Data File Name   | / Users/ kathym/ Documents/ APhD2015/ Abragam/ KMAB136b_C6D6/ 13/ fid |
| Origin           | Bruker BioSpin GmbH                                                   |
| Owner            | av400bb                                                               |
| Solvent          | C6D6                                                                  |
| Temperature      | 300.0                                                                 |
| Pulse Sequence   | zgpg                                                                  |
| Experiment       | 1D                                                                    |
| Number of Scans  | 200                                                                   |
| Receiver Gain    | 193                                                                   |
| Relaxation Delay | 0.2000                                                                |
| Pulse Width      | 10.0000                                                               |
| Acquisition Time | 1.2845                                                                |
| Acquisition Date | 2017-02-23T13:04:33                                                   |
| Spectrometer     | 128.38                                                                |
| Frequency        |                                                                       |
| Spectral Width   | 25510.2                                                               |
| Lowest Frequency | -12754.9                                                              |
| Nucleus          | $^{11}\text{B}$                                                       |
| Acquired Size    | 32768                                                                 |
| Spectral Size    | 65536                                                                 |

-1.35  
-4.71

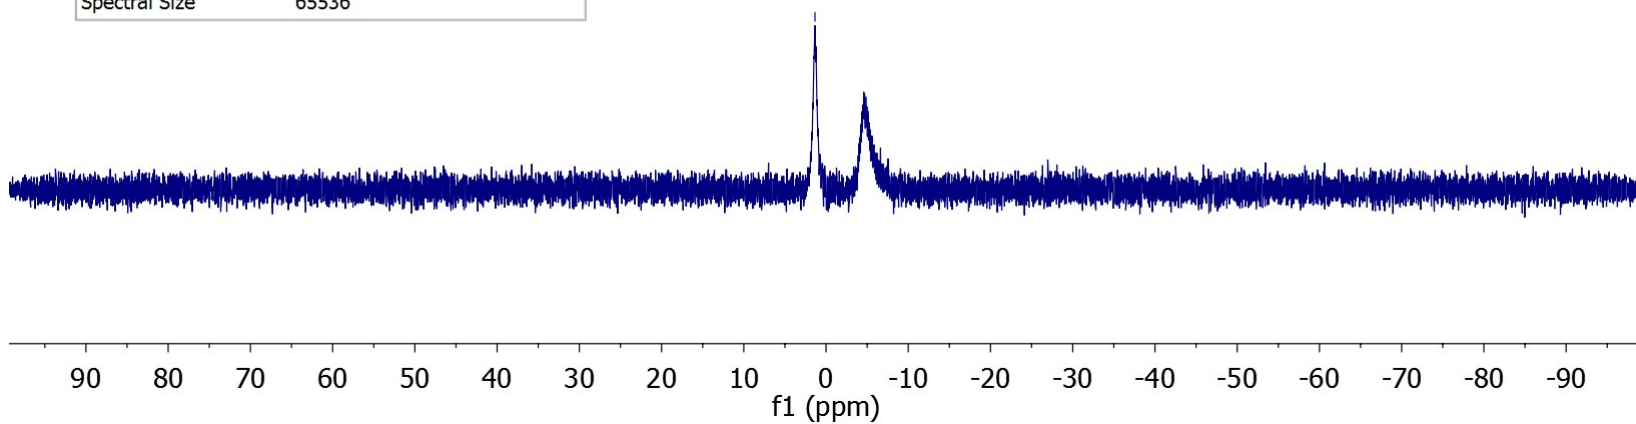

### $^{31}\text{P}\{^1\text{H}\}$ NMR Spectrum of 3f

| Parameter              | Value                                                                                                                 |
|------------------------|-----------------------------------------------------------------------------------------------------------------------|
| Data File Name         | / Users/ kathym/<br>Documents/ APhD2015/<br>Abragam/<br>KMAb136a_workup_DCM<br>Ethanol_rotorvap_air_C6<br>D6/ 11/ fid |
| Origin                 | Bruker BioSpin GmbH                                                                                                   |
| Owner                  | av400bb                                                                                                               |
| Solvent                | C6D6                                                                                                                  |
| Temperature            | 300.0                                                                                                                 |
| Pulse Sequence         | zgpg30                                                                                                                |
| Experiment             | 1D                                                                                                                    |
| Number of Scans        | 64                                                                                                                    |
| Receiver Gain          | 193                                                                                                                   |
| Relaxation Delay       | 2.0000                                                                                                                |
| Pulse Width            | 8.0000                                                                                                                |
| Acquisition Time       | 0.5112                                                                                                                |
| Acquisition Date       | 2017-02-24T15:53:53                                                                                                   |
| Spectrometer Frequency | 161.97                                                                                                                |
| Spectral Width         | 64102.6                                                                                                               |
| Lowest Frequency       | -40150.1                                                                                                              |
| Nucleus                | $^{31}\text{P}$                                                                                                       |
| Acquired Size          | 32768                                                                                                                 |
| Spectral Size          | 65536                                                                                                                 |

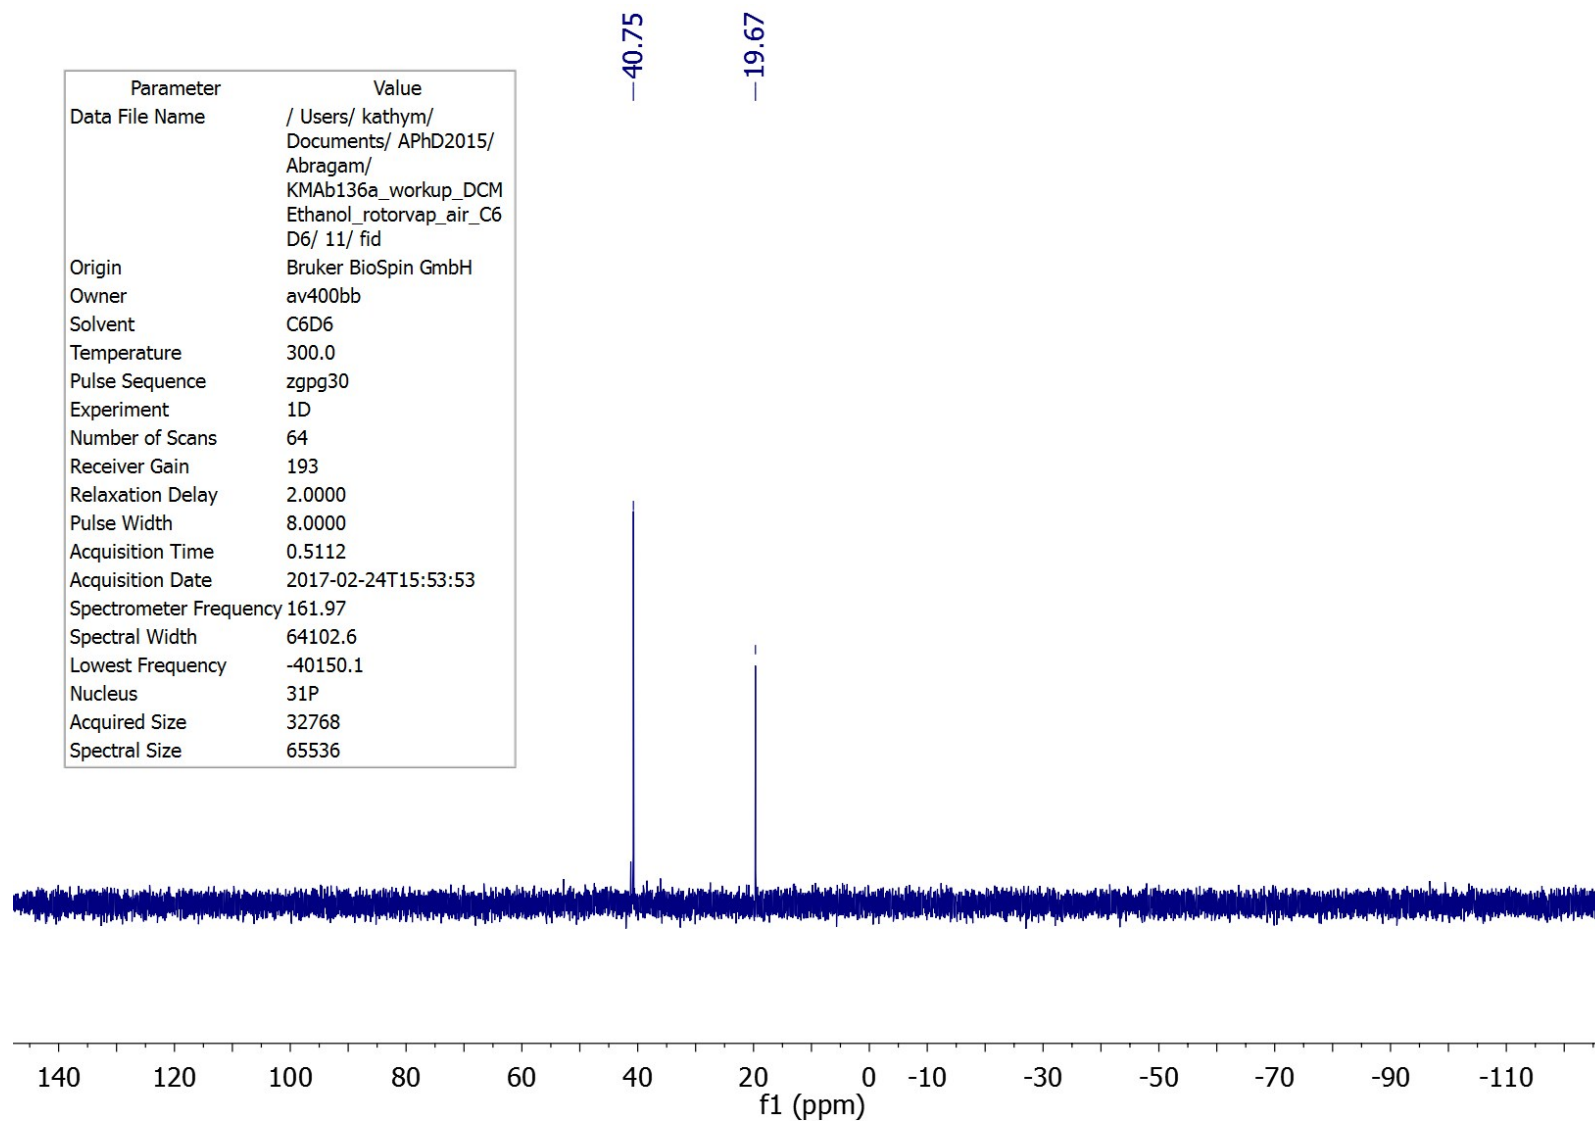

Characterisation of  $[\text{Ru}(\text{SiMe}_3)(\text{CO})(\text{PPh}_3)\{\text{H}_2\text{B}(\text{mt})_2\}]$  (3f)

# <sup>1</sup>H NMR Spectrum of 3g

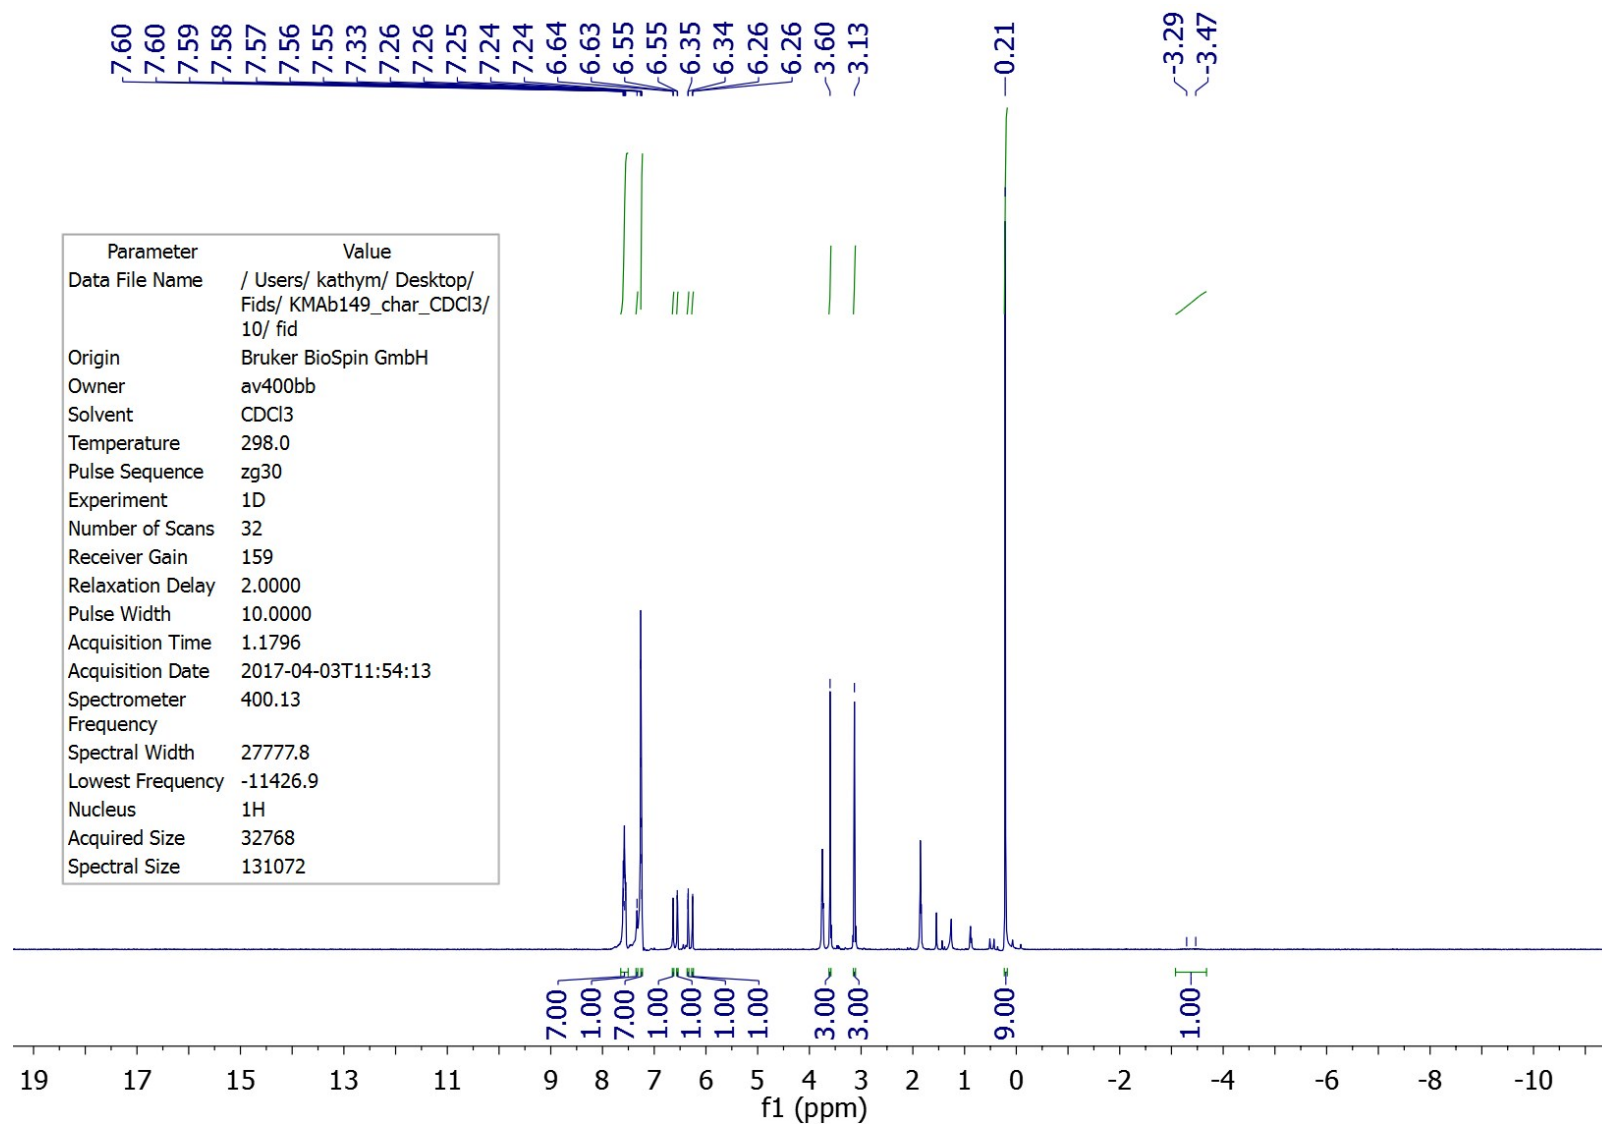

# <sup>1</sup>H NMR Spectrum of 3g (Expansion)

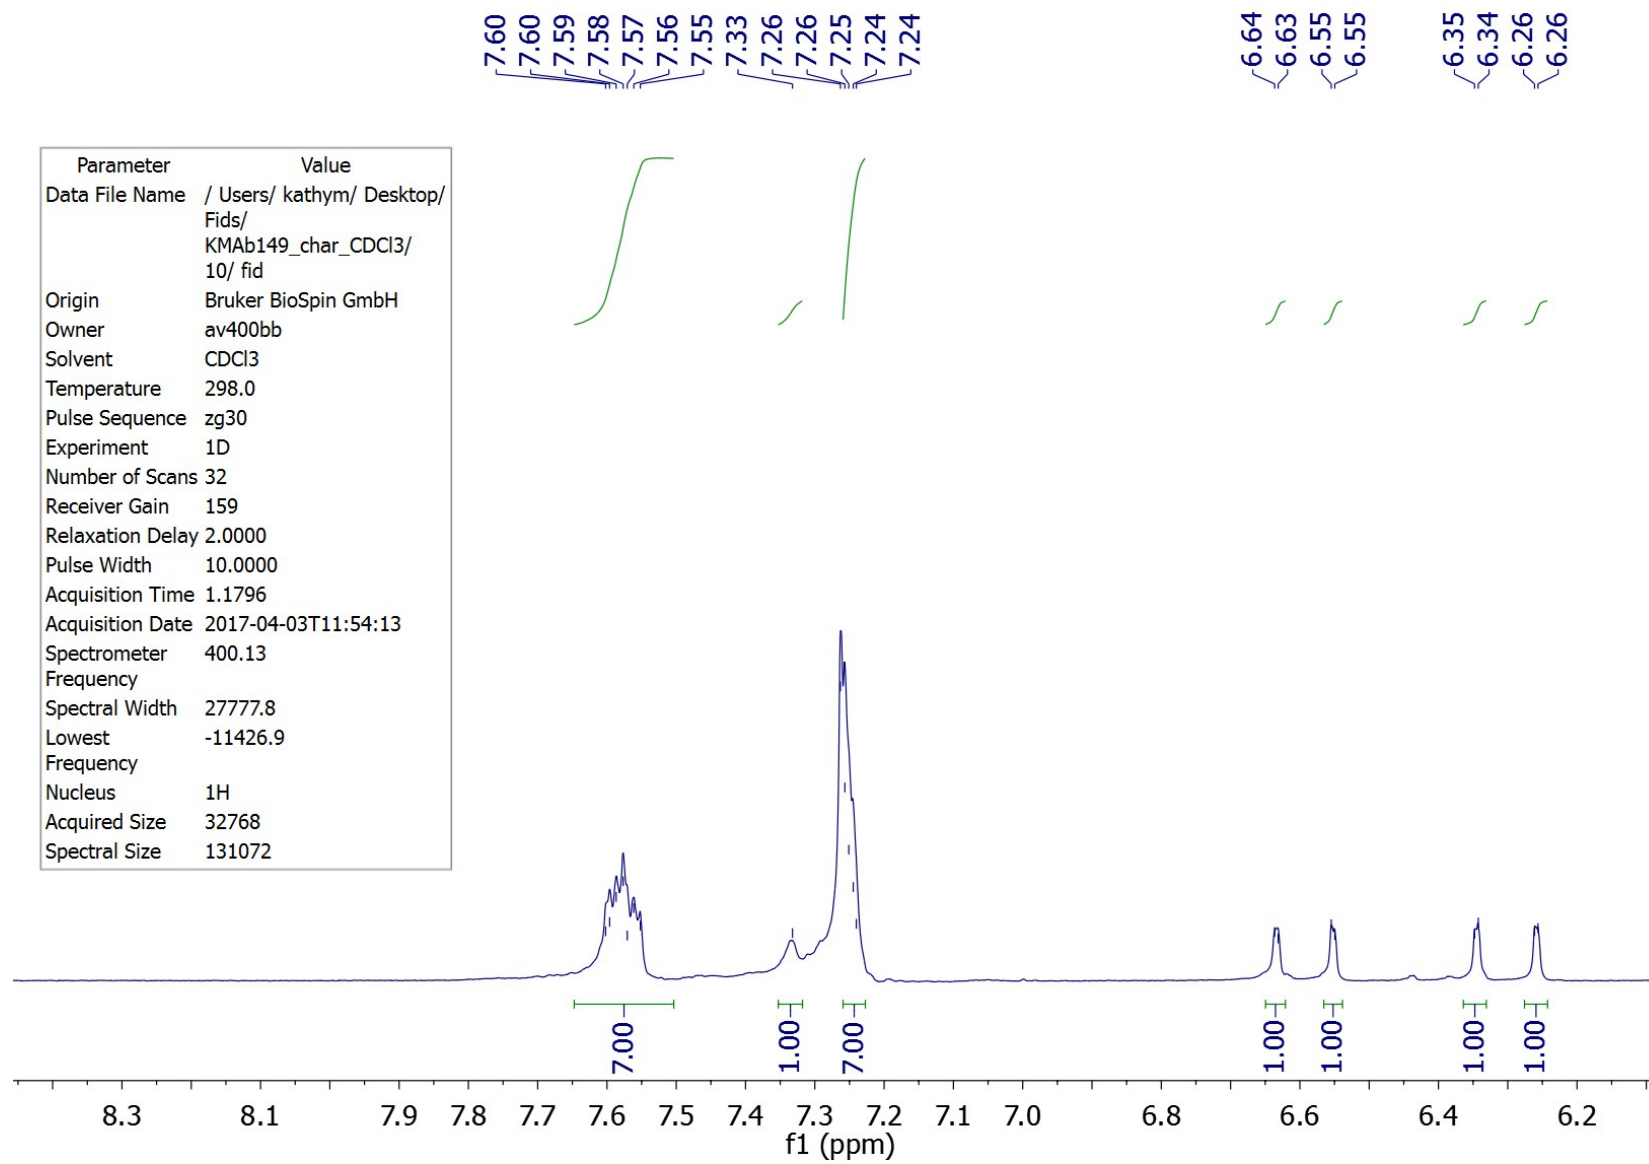

# $^{11}\text{B}\{^1\text{H}\}$ NMR Spectrum of 3g

| Parameter        | Value                                                       |
|------------------|-------------------------------------------------------------|
| Data File Name   | / Users/ kathym/ Desktop/ Fids/ KMAb149_char_CDCl3/ 13/ fid |
| Origin           | Bruker BioSpin GmbH                                         |
| Owner            | av400bb                                                     |
| Solvent          | CDCl3                                                       |
| Temperature      | 300.0                                                       |
| Pulse Sequence   | zgpg                                                        |
| Experiment       | 1D                                                          |
| Number of Scans  | 200                                                         |
| Receiver Gain    | 193                                                         |
| Relaxation Delay | 0.2000                                                      |
| Pulse Width      | 10.0000                                                     |
| Acquisition Time | 1.2845                                                      |
| Acquisition Date | 2017-04-03T12:14:51                                         |
| Spectrometer     | 128.38                                                      |
| Frequency        |                                                             |
| Spectral Width   | 25510.2                                                     |
| Lowest Frequency | -12754.9                                                    |
| Nucleus          | $^{11}\text{B}$                                             |
| Acquired Size    | 32768                                                       |
| Spectral Size    | 65536                                                       |

--4.81

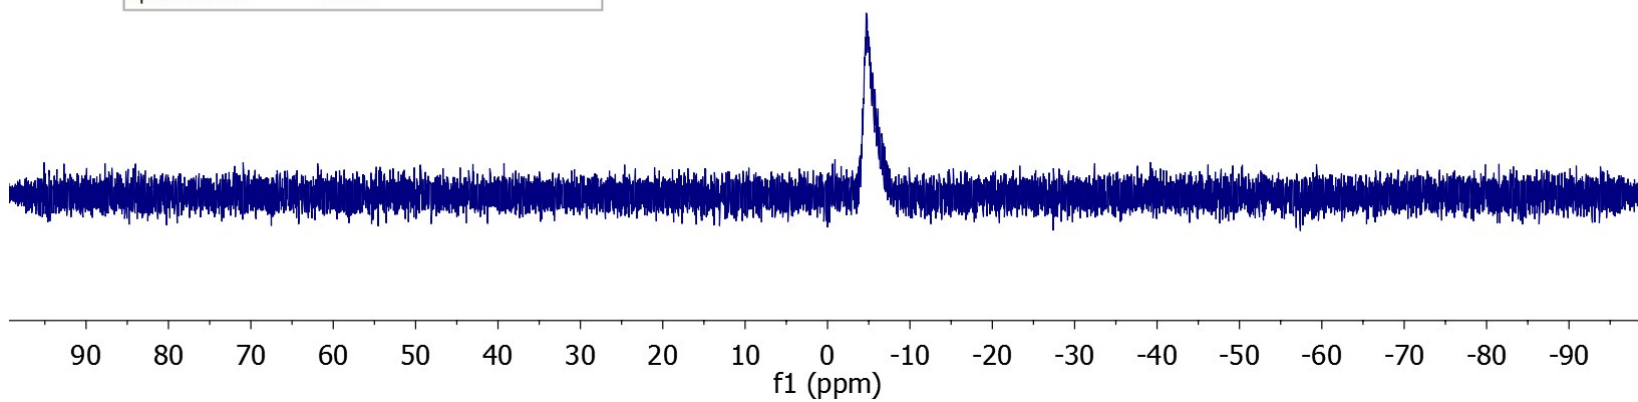

### $^{31}\text{P}\{^1\text{H}\}$ NMR Spectrum of 3g

| Parameter        | Value                                                       |
|------------------|-------------------------------------------------------------|
| Data File Name   | / Users/ kathym/ Desktop/ Fids/ KMAb149_char_CDCl3/ 11/ fid |
| Origin           | Bruker BioSpin GmbH                                         |
| Owner            | av400bb                                                     |
| Solvent          | CDCl3                                                       |
| Temperature      | 300.1                                                       |
| Pulse Sequence   | zgpg30                                                      |
| Experiment       | 1D                                                          |
| Number of Scans  | 64                                                          |
| Receiver Gain    | 193                                                         |
| Relaxation Delay | 2.0000                                                      |
| Pulse Width      | 8.0000                                                      |
| Acquisition Time | 0.5112                                                      |
| Acquisition Date | 2017-04-03T12:01:47                                         |
| Spectrometer     | 161.97                                                      |
| Frequency        |                                                             |
| Spectral Width   | 64102.6                                                     |
| Lowest Frequency | -40150.1                                                    |
| Nucleus          | $^{31}\text{P}$                                             |
| Acquired Size    | 32768                                                       |
| Spectral Size    | 65536                                                       |

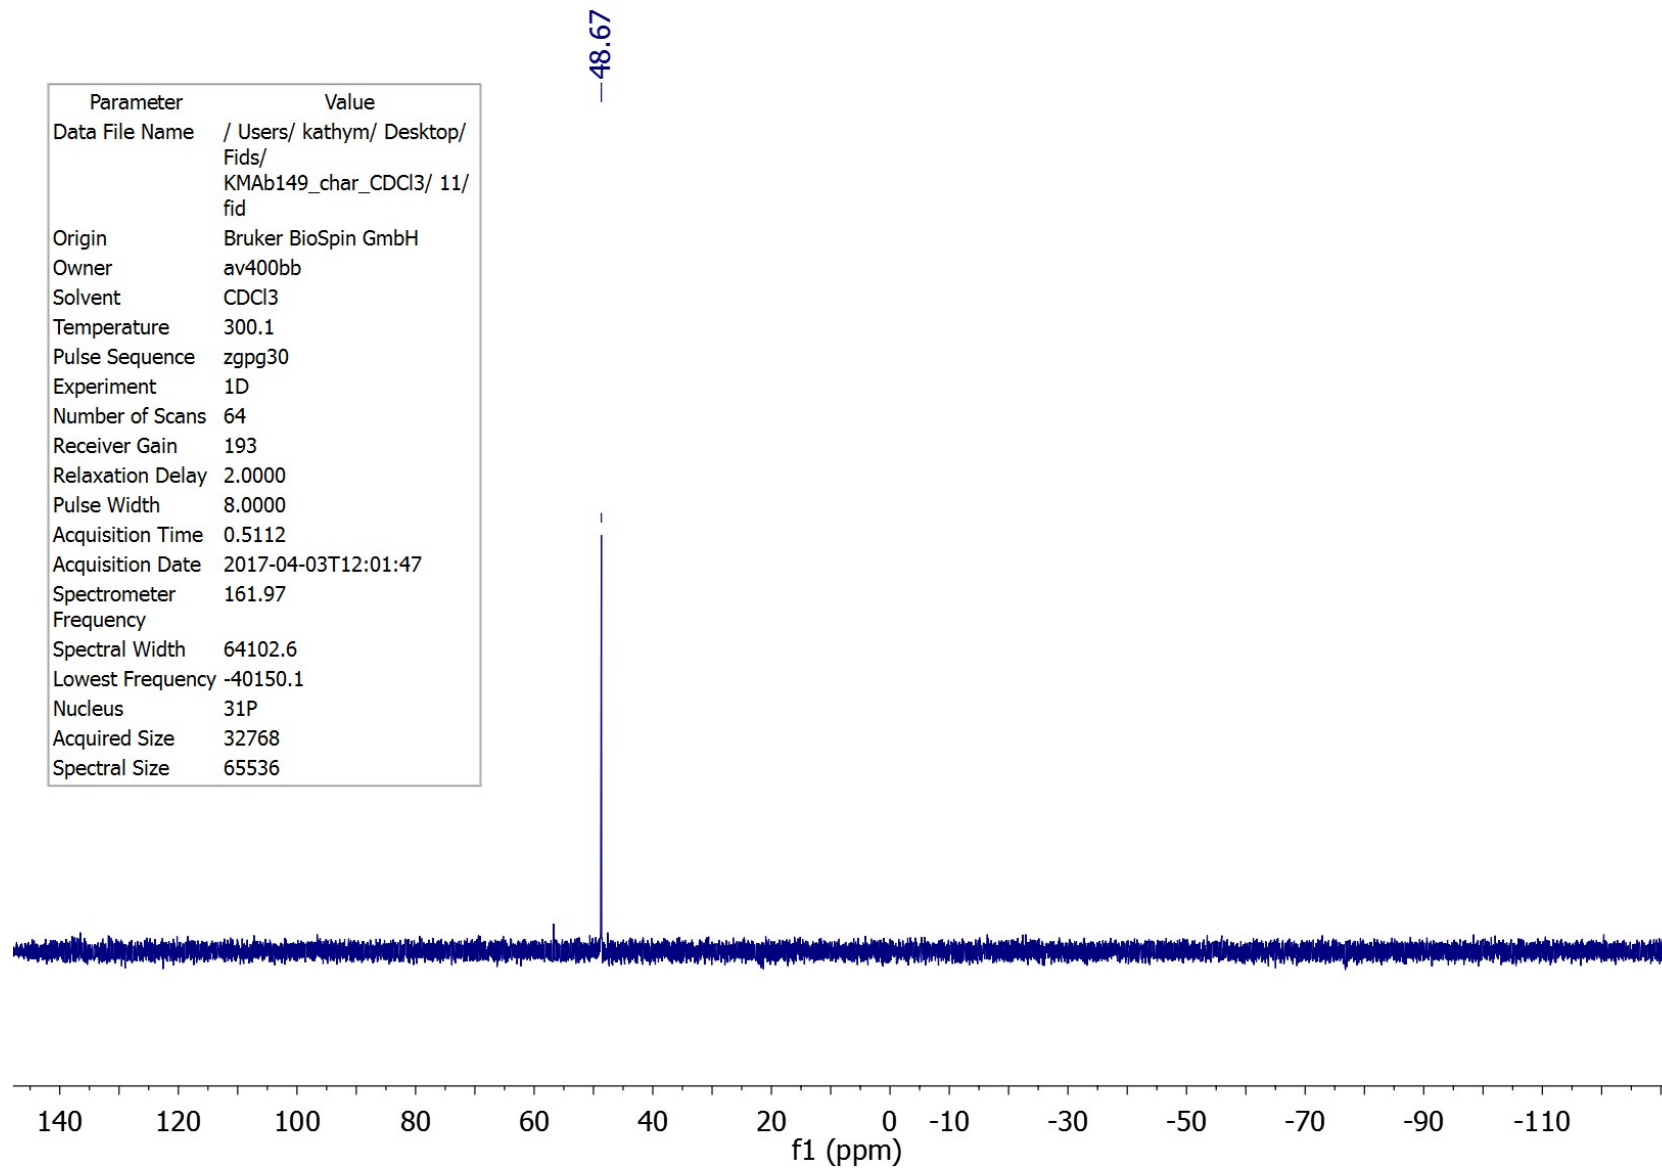



**$^{13}\text{C}\{^1\text{H}\}$  NMR Spectrum of 3g**

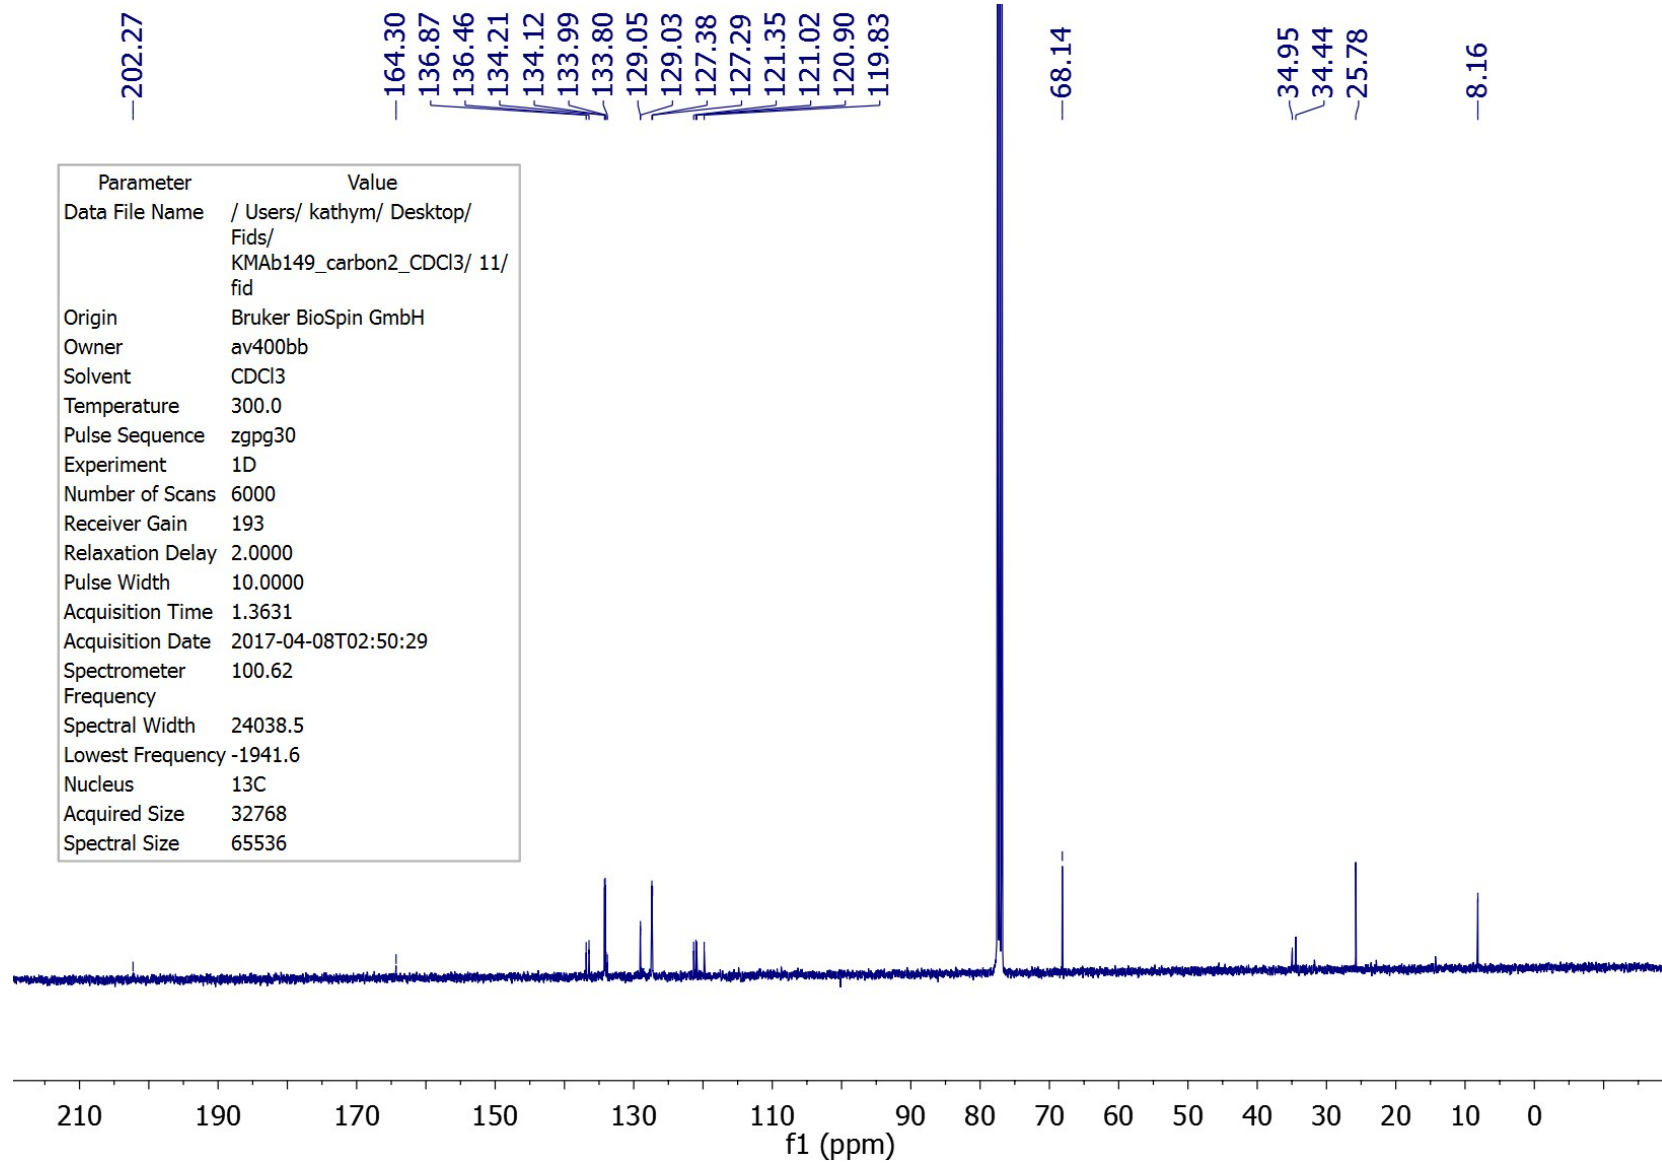

| Parameter        | Value                                                          |
|------------------|----------------------------------------------------------------|
| Data File Name   | / Users/ kathym/ Desktop/ Fids/ KMAb149_carbon2_CDCl3/ 11/ fid |
| Origin           | Bruker BioSpin GmbH                                            |
| Owner            | av400bb                                                        |
| Solvent          | CDCl3                                                          |
| Temperature      | 300.0                                                          |
| Pulse Sequence   | zgpg30                                                         |
| Experiment       | 1D                                                             |
| Number of Scans  | 6000                                                           |
| Receiver Gain    | 193                                                            |
| Relaxation Delay | 2.0000                                                         |
| Pulse Width      | 10.0000                                                        |
| Acquisition Time | 1.3631                                                         |
| Acquisition Date | 2017-04-08T02:50:29                                            |
| Spectrometer     | 100.62                                                         |
| Frequency        |                                                                |
| Spectral Width   | 24038.5                                                        |
| Lowest Frequency | -1941.6                                                        |
| Nucleus          | $^{13}\text{C}$                                                |
| Acquired Size    | 32768                                                          |
| Spectral Size    | 65536                                                          |

**$^{13}\text{C}\{^1\text{H}\}$  NMR Spectrum of 3g (Expansion)**

| Parameter        | Value                                                          |
|------------------|----------------------------------------------------------------|
| Data File Name   | / Users/ kathym/ Desktop/ Fids/ KMAb149_carbon2_CDCl3/ 11/ fid |
| Origin           | Bruker BioSpin GmbH                                            |
| Owner            | av400bb                                                        |
| Solvent          | CDCl3                                                          |
| Temperature      | 300.0                                                          |
| Pulse Sequence   | zgpg30                                                         |
| Experiment       | 1D                                                             |
| Number of Scans  | 6000                                                           |
| Receiver Gain    | 193                                                            |
| Relaxation Delay | 2.0000                                                         |
| Pulse Width      | 10.0000                                                        |
| Acquisition Time | 1.3631                                                         |
| Acquisition Date | 2017-04-08T02:50:29                                            |
| Spectrometer     | 100.62                                                         |
| Frequency        |                                                                |
| Spectral Width   | 24038.5                                                        |
| Lowest Frequency | -1941.6                                                        |
| Nucleus          | $^{13}\text{C}$                                                |
| Acquired Size    | 32768                                                          |
| Spectral Size    | 65536                                                          |

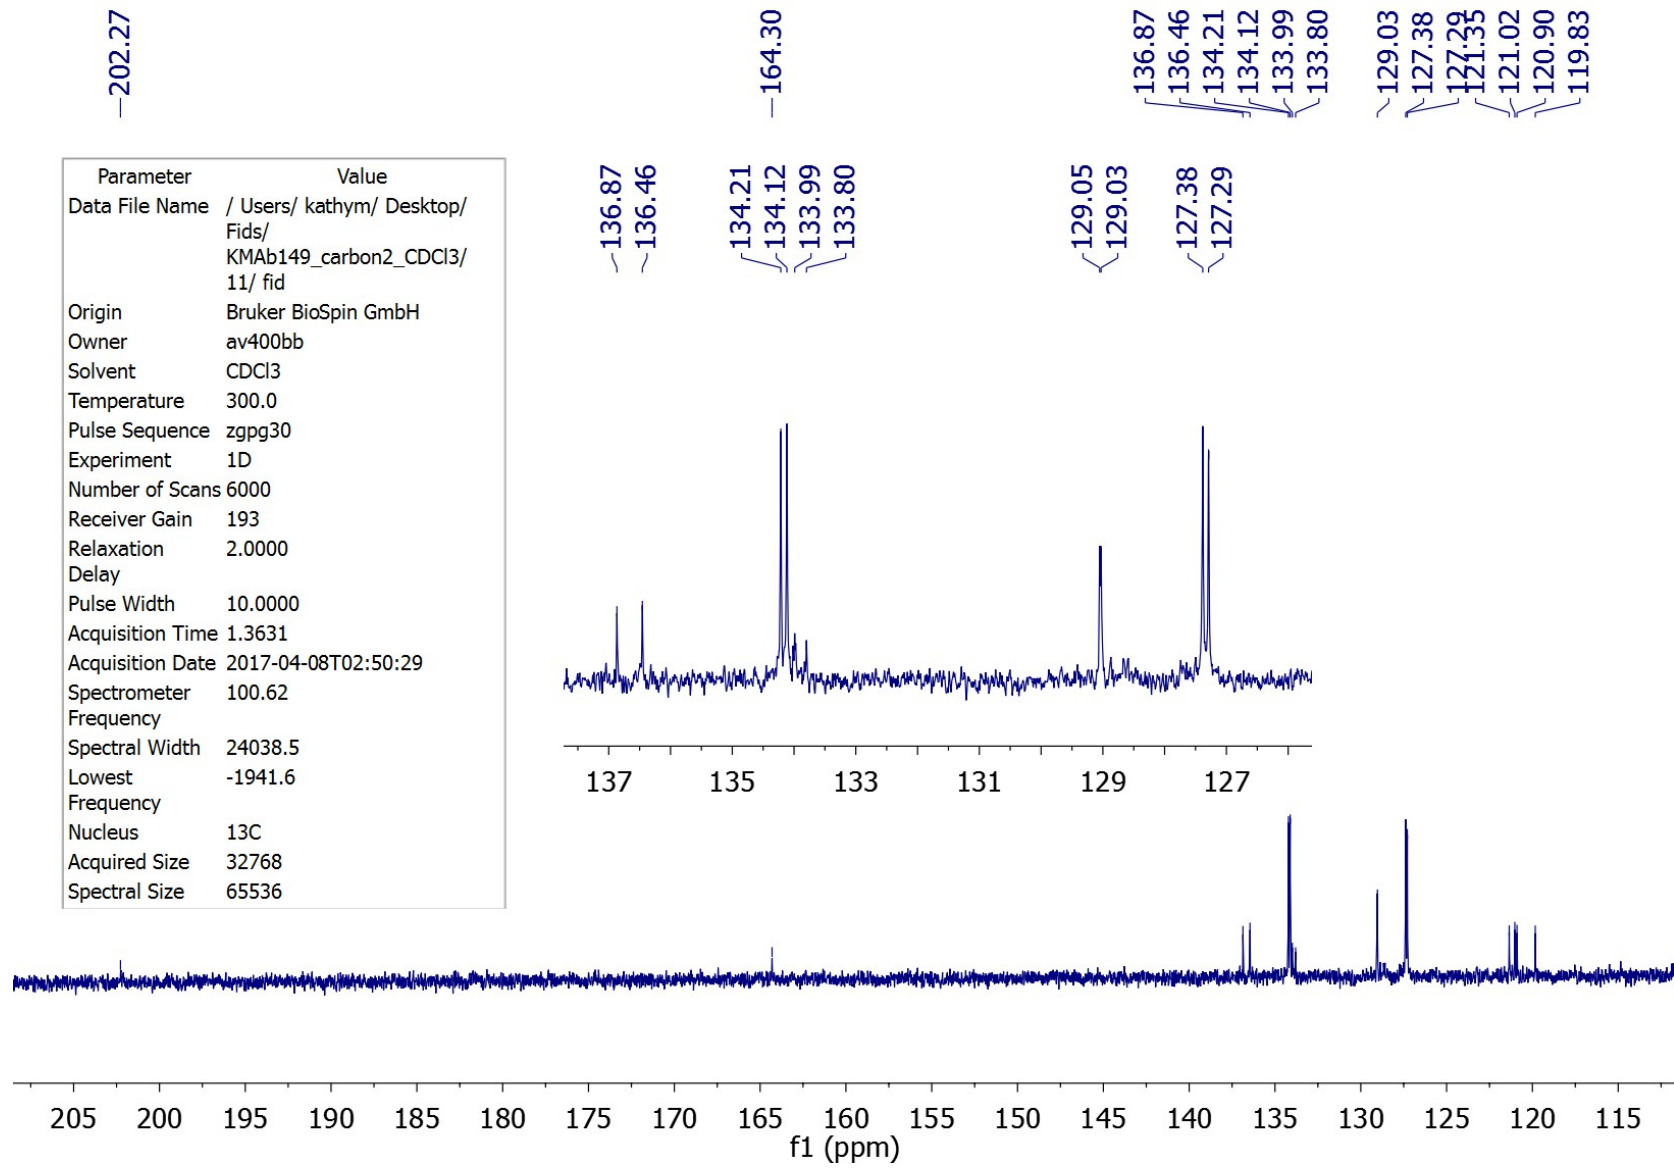

## Characterisation of $[\text{Os}(\text{H})(\text{CO})(\text{PPh}_3)_3\{\text{H}_2\text{B}(\text{mt})_2\}]$ (**3h**)

### Commentary

As for **3a**, two weak infrared absorptions may be assigned to the terminal  $\nu_{\text{BH}}$  (KBr:  $2398\text{ cm}^{-1}$ ) and  $3c-2e\ \nu_{\text{BHOs}}$  ( $2100\text{ cm}^{-1}$ ) groups. The anticipated  $\nu_{\text{OsH}}$  absorption appeared as a shoulder ( $1949\text{ cm}^{-1}$ ) on the more intense  $\nu_{\text{CO}}$  absorption ( $1907\text{ cm}^{-1}$ ). The  $^1\text{H}$  NMR spectrum includes a broad (h.h.w. =  $0.44\text{ ppm}$ ) resonance centred at  $-7.02\text{ ppm}$  due to the B–H–Os interaction in addition to a doublet at  $-13.23\text{ ppm}$  ( $^2J_{\text{PH}} = 18.2\text{ Hz}$ ) due to the terminal osmium hydride.

# <sup>1</sup>H NMR Spectrum of 3h

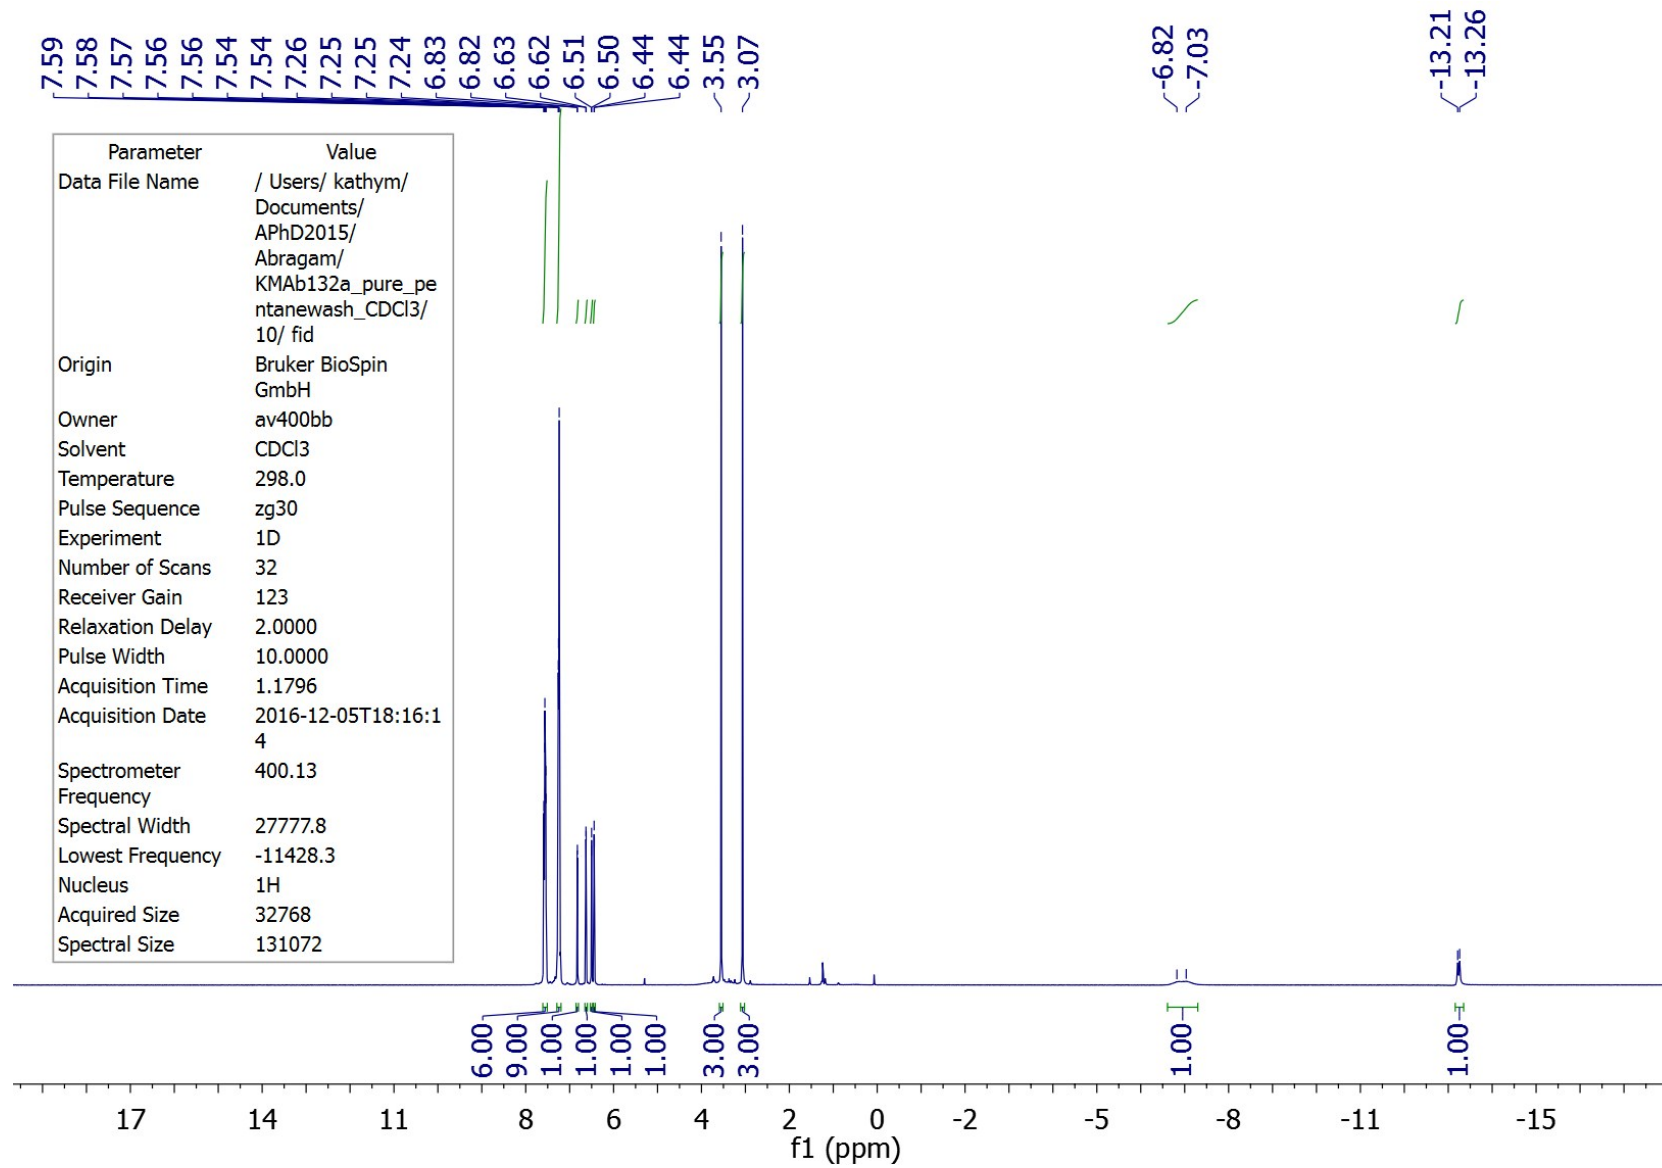

# <sup>1</sup>H NMR Spectrum of 3h (Expansion)

| Parameter        | Value                                                                                                      |
|------------------|------------------------------------------------------------------------------------------------------------|
| Data File Name   | / Users/ kathym/<br>Documents/<br>APhD2015/<br>Abragam/<br>KMAb132a_pure_pe<br>ntanewash_CDCl3/<br>10/ fid |
| Origin           | Bruker BioSpin<br>GmbH                                                                                     |
| Owner            | av400bb                                                                                                    |
| Solvent          | CDCl3                                                                                                      |
| Temperature      | 298.0                                                                                                      |
| Pulse Sequence   | zg30                                                                                                       |
| Experiment       | 1D                                                                                                         |
| Number of Scans  | 32                                                                                                         |
| Receiver Gain    | 123                                                                                                        |
| Relaxation Delay | 2.0000                                                                                                     |
| Pulse Width      | 10.0000                                                                                                    |
| Acquisition Time | 1.1796                                                                                                     |
| Acquisition Date | 2016-12-05T18:16:1<br>4                                                                                    |
| Spectrometer     | 400.13                                                                                                     |
| Frequency        |                                                                                                            |
| Spectral Width   | 27777.8                                                                                                    |
| Lowest Frequency | -11428.3                                                                                                   |
| Nucleus          | <sup>1</sup> H                                                                                             |
| Acquired Size    | 32768                                                                                                      |
| Spectral Size    | 131072                                                                                                     |

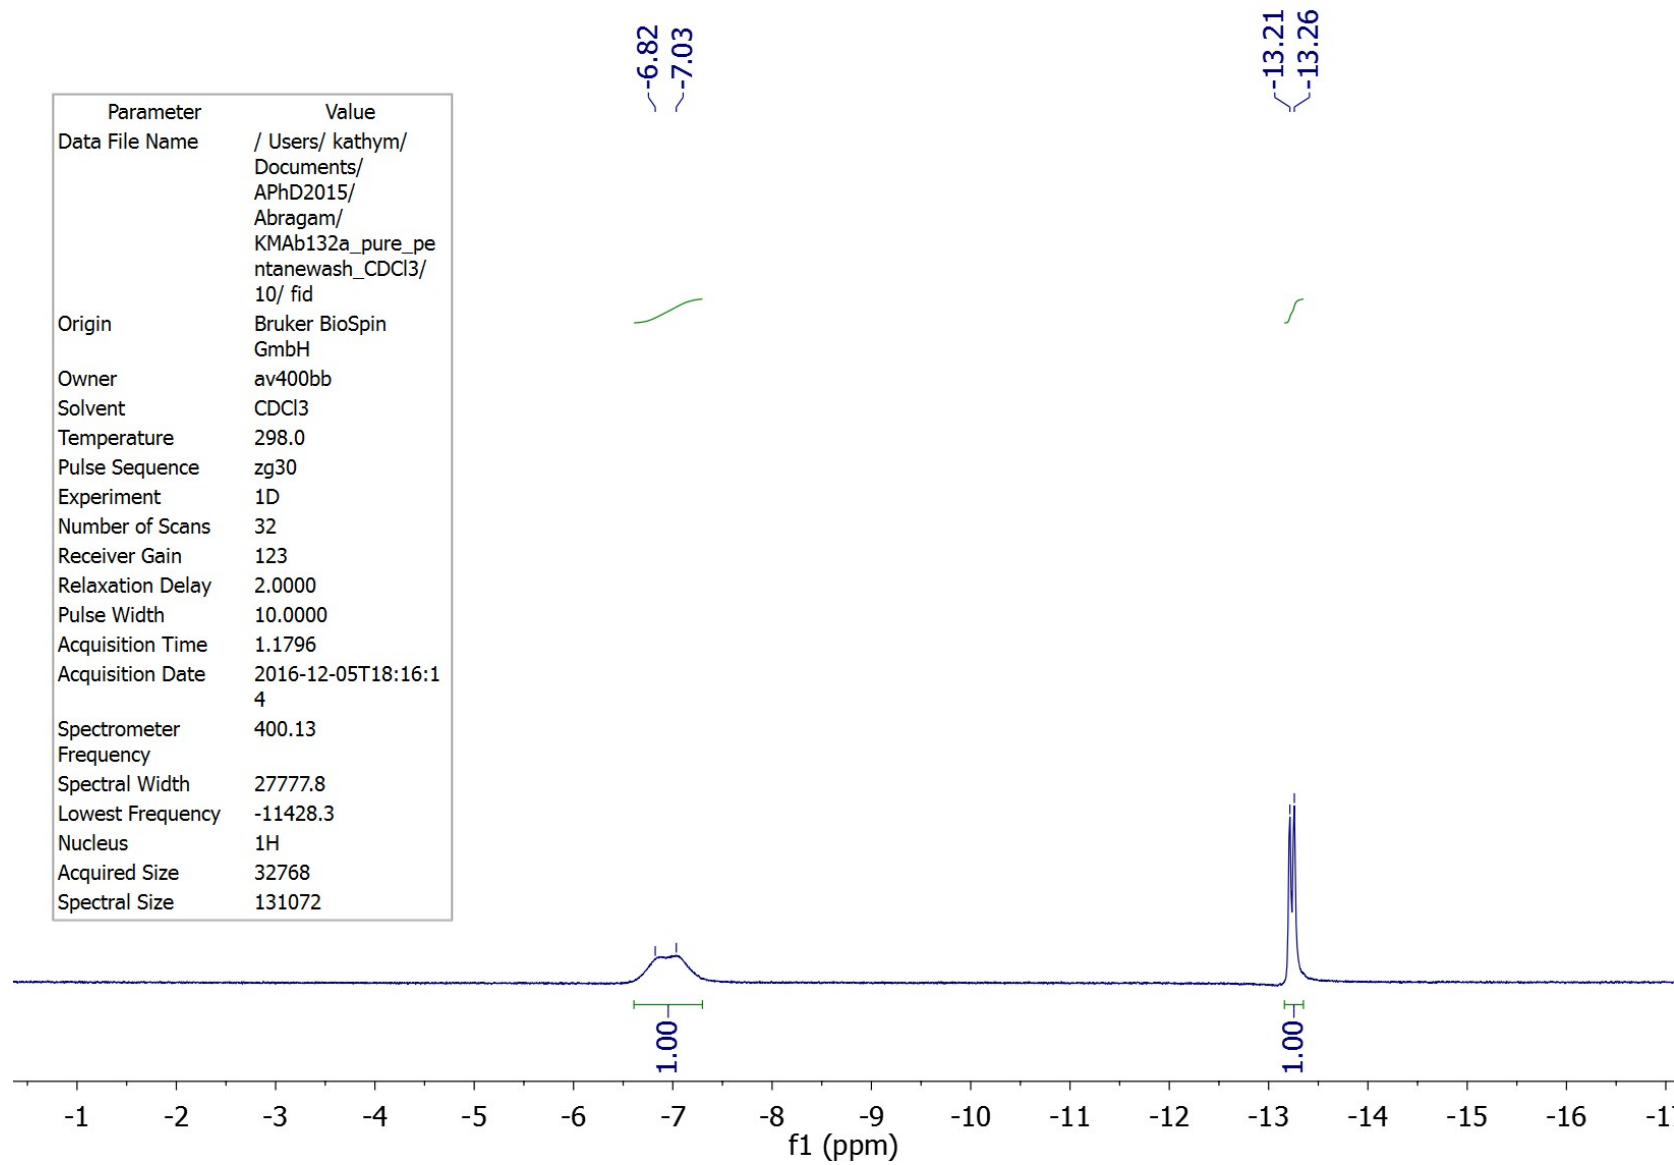

# $^{11}\text{B}\{^1\text{H}\}$ NMR Spectrum of 3h

| Parameter        | Value                                                                       |
|------------------|-----------------------------------------------------------------------------|
| Data File Name   | / Users/ kathym/ Documents/ APhD2015/ Abragam/ KMAb132a_pure_CDCl3/ 15/ fid |
| Origin           | Bruker BioSpin GmbH                                                         |
| Owner            | av400bb                                                                     |
| Solvent          | CDCl3                                                                       |
| Temperature      | 300.0                                                                       |
| Pulse Sequence   | zgpg                                                                        |
| Experiment       | 1D                                                                          |
| Number of Scans  | 200                                                                         |
| Receiver Gain    | 193                                                                         |
| Relaxation Delay | 0.2000                                                                      |
| Pulse Width      | 10.0000                                                                     |
| Acquisition Time | 1.2845                                                                      |
| Acquisition Date | 2016-12-06T05:36:15                                                         |
| Spectrometer     | 128.38                                                                      |
| Frequency        |                                                                             |
| Spectral Width   | 25510.2                                                                     |
| Lowest Frequency | -12754.9                                                                    |
| Nucleus          | $^{11}\text{B}$                                                             |
| Acquired Size    | 32768                                                                       |
| Spectral Size    | 65536                                                                       |

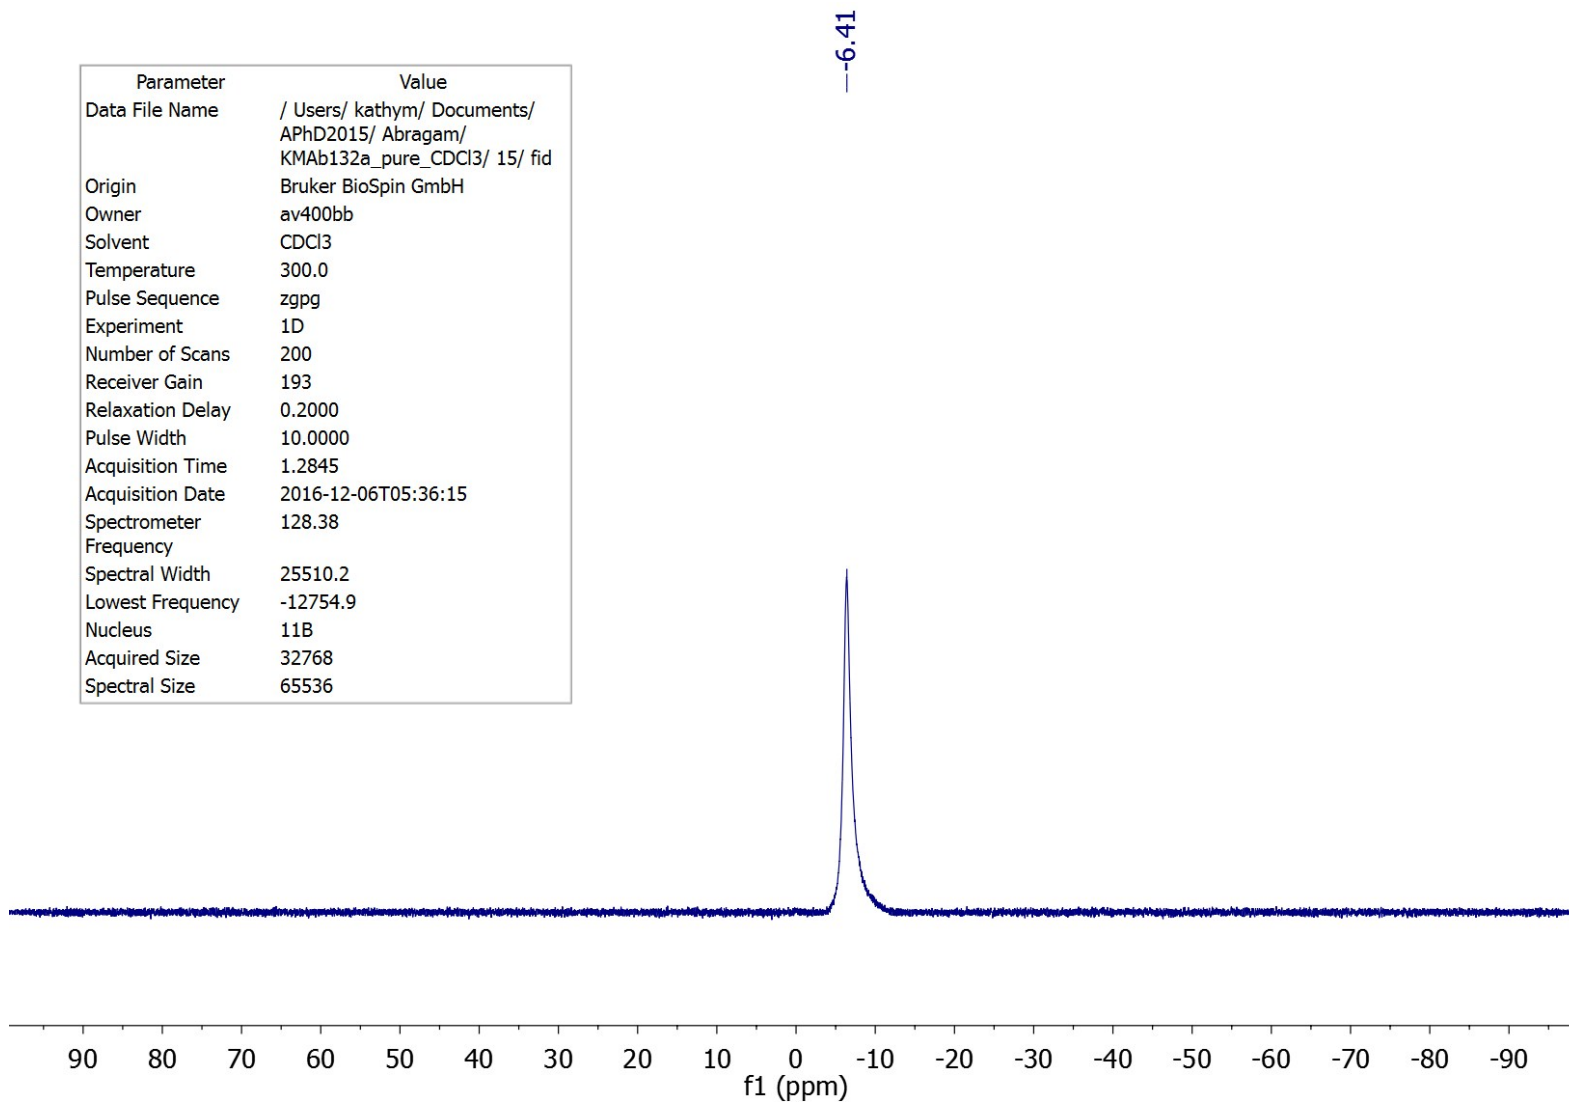

### $^{31}\text{P}\{^1\text{H}\}$ NMR Spectrum of 3h

| Parameter        | Value                                                             |
|------------------|-------------------------------------------------------------------|
| Data File        | / Users/ kathym/ Documents/                                       |
| Name             | APhD2015/ Abragam/<br>KMAb132a_pure_pentanewash_CDCl3/<br>11/ fid |
| Origin           | Bruker BioSpin GmbH                                               |
| Owner            | av400bb                                                           |
| Solvent          | CDCl3                                                             |
| Temperature      | 300.0                                                             |
| Pulse            | zpgg30                                                            |
| Sequence         |                                                                   |
| Experiment       | 1D                                                                |
| Number of Scans  | 128                                                               |
| Receiver Gain    | 193                                                               |
| Relaxation Delay | 2.0000                                                            |
| Pulse Width      | 8.0000                                                            |
| Acquisition Time | 0.5112                                                            |
| Acquisition Date | 2016-12-05T18:25:48                                               |
| Spectrometer     | 161.97                                                            |
| Frequency        |                                                                   |
| Spectral Width   | 64102.6                                                           |
| Lowest Frequency | -40044.7                                                          |
| Nucleus          | 31P                                                               |
| Acquired Size    | 32768                                                             |
| Spectral Size    | 65536                                                             |

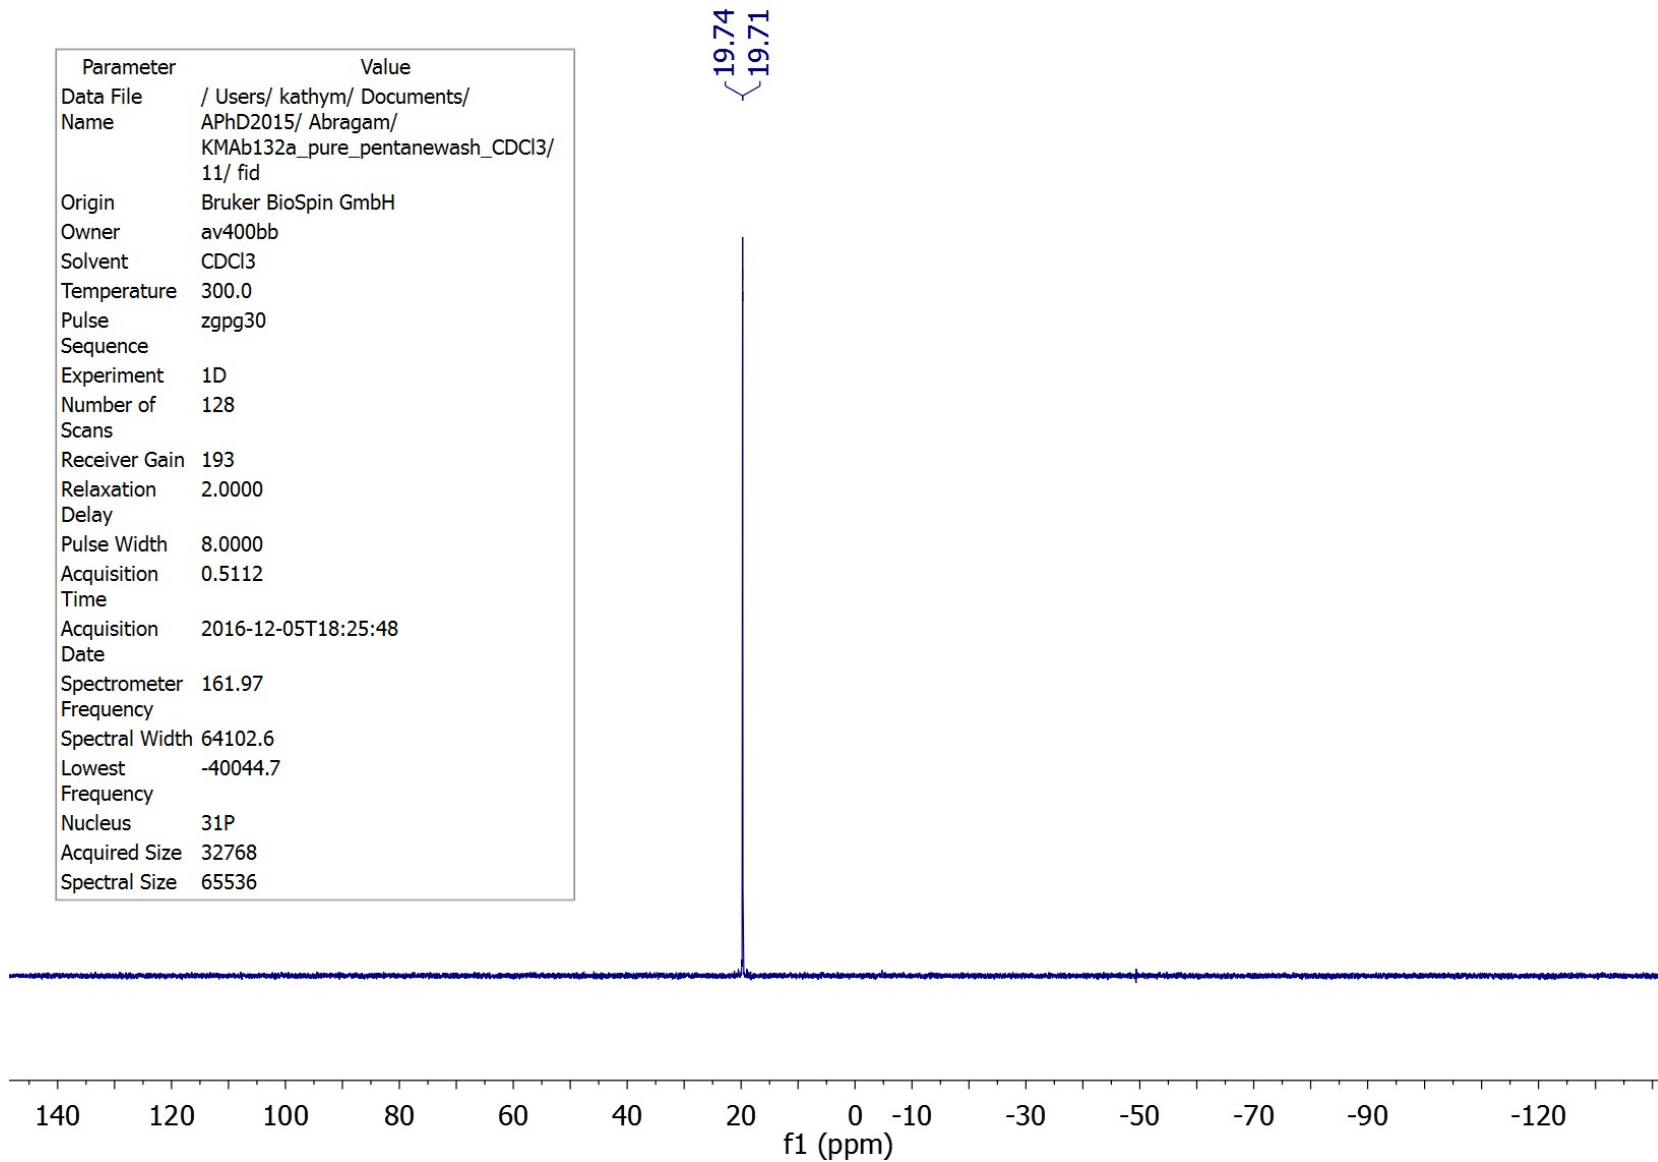

**$^{13}\text{C}\{^1\text{H}\}$  NMR Spectrum of 3h**

$\{$ 182.28  
 $\{$ 182.18  
 $\sim$ 170.65  
 $\sim$ 167.39  
 $\{$ 137.12  
 $\{$ 136.62  
 $\{$ 134.14  
 $\{$ 134.04  
 $\{$ 129.06  
 $\{$ 129.04  
 $\{$ 127.37  
 $\{$ 127.27  
 $\{$ 122.47  
 $\{$ 121.44  
 $\{$ 120.96  
 $\{$ 120.92  
 $\{$ 77.48  
 $\{$ 77.16  
 $\{$ 76.84  
 $\{$ 34.62  
 $\{$ 34.12

| Parameter        | Value                                                                       |
|------------------|-----------------------------------------------------------------------------|
| Data File Name   | / Users/ kathym/ Documents/ APhD2015/ Ernst/ KMAb132a_carbon_CDCl3/ 11/ fid |
| Origin           | Bruker BioSpin GmbH                                                         |
| Owner            | av400bb                                                                     |
| Solvent          | CDCl3                                                                       |
| Temperature      | 298.5                                                                       |
| Pulse Sequence   | zgpg30                                                                      |
| Experiment       | 1D                                                                          |
| Number of Scans  | 4000                                                                        |
| Receiver Gain    | 200                                                                         |
| Relaxation Delay | 2.0000                                                                      |
| Pulse Width      | 10.0000                                                                     |
| Acquisition Time | 1.3631                                                                      |
| Acquisition Date | 2016-12-06T05:45:58                                                         |
| Spectrometer     | 100.63                                                                      |
| Frequency        |                                                                             |
| Spectral Width   | 24038.5                                                                     |
| Lowest Frequency | -1942.7                                                                     |
| Nucleus          | $^{13}\text{C}$                                                             |
| Acquired Size    | 32768                                                                       |
| Spectral Size    | 65536                                                                       |

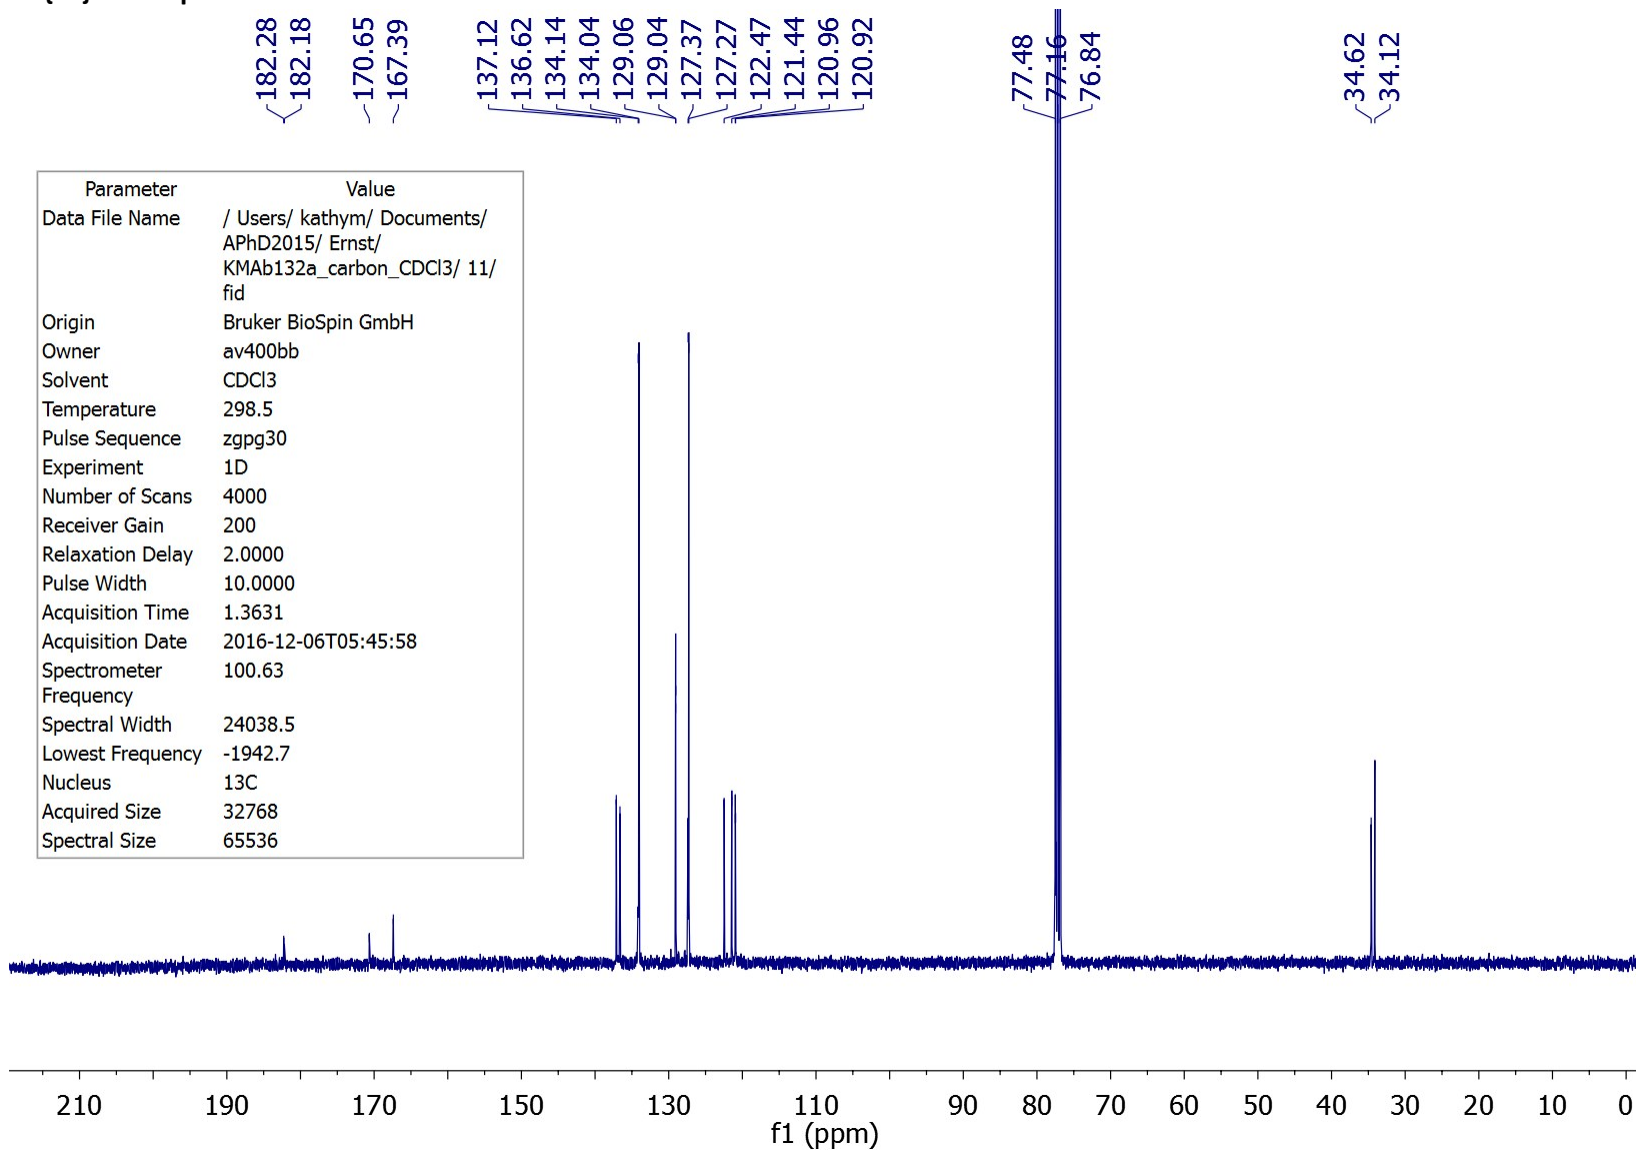



### $^{13}\text{C}\{^1\text{H}\}$ NMR Spectrum of 3h (Expansion)

| Parameter        | Value                                                                       |
|------------------|-----------------------------------------------------------------------------|
| Data File Name   | / Users/ kathym/ Documents/ APhD2015/ Ernst/ KMAB132a_carbon_CDCl3/ 11/ fid |
| Origin           | Bruker BioSpin GmbH                                                         |
| Owner            | av400bb                                                                     |
| Solvent          | CDCl <sub>3</sub>                                                           |
| Temperature      | 298.5                                                                       |
| Pulse Sequence   | zgpg30                                                                      |
| Experiment       | 1D                                                                          |
| Number of Scans  | 4000                                                                        |
| Receiver Gain    | 200                                                                         |
| Relaxation       | 2.0000                                                                      |
| Delay            |                                                                             |
| Pulse Width      | 10.0000                                                                     |
| Acquisition Time | 1.3631                                                                      |
| Acquisition Date | 2016-12-06T05:45:58                                                         |
| Spectrometer     | 100.63                                                                      |
| Frequency        |                                                                             |
| Spectral Width   | 24038.5                                                                     |
| Lowest           | -1942.7                                                                     |
| Frequency        |                                                                             |
| Nucleus          | $^{13}\text{C}$                                                             |
| Acquired Size    | 32768                                                                       |
| Spectral Size    | 65536                                                                       |

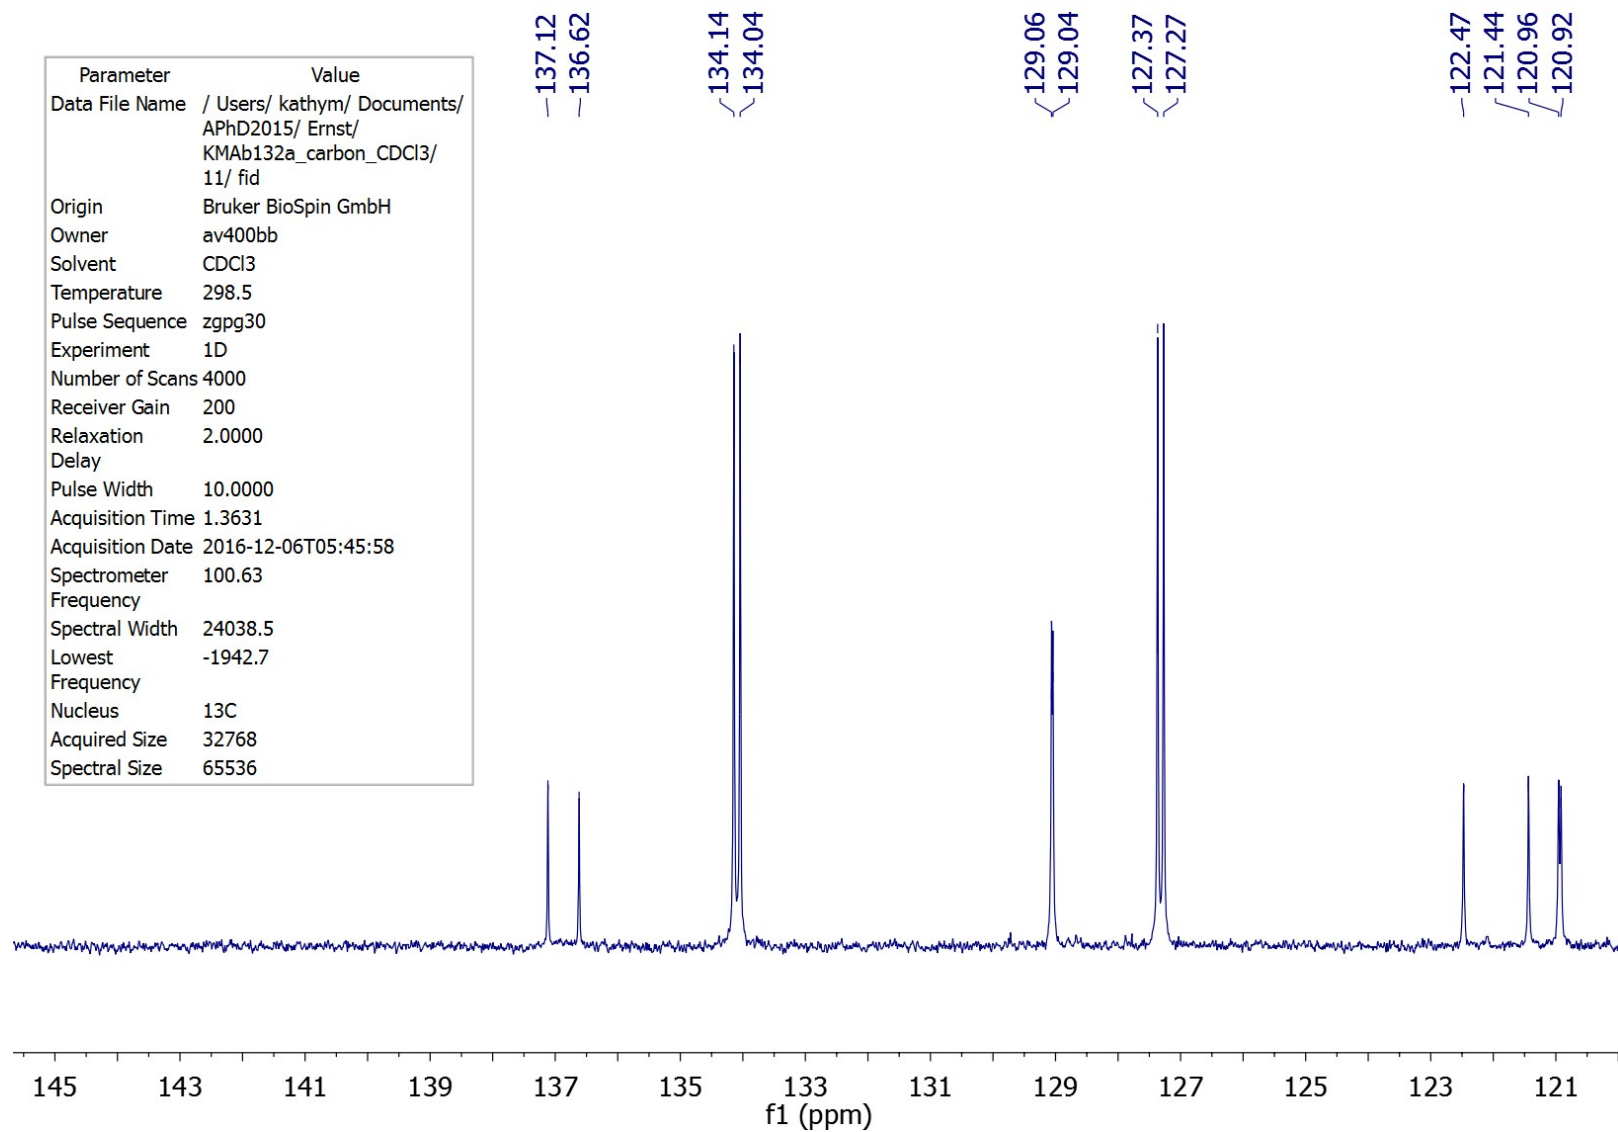

Supplement: c7dt02420g1.pdf [file c7dt02420g1.pdf]
